# Supplementary material for: Alpha-2-adrenergic receptor agonists for the prevention of delirium and cognitive decline after open heart surgery (ALPHA2PREVENT): protocol for a multicentre randomised controlled trial
Source: PubMed Central journal article supplement — BMJ Open. 2022 Jun 20;12(6):e057460. doi: 10.1136/bmjopen-2021-057460 (PMC9214392; doi:10.1136/bmjopen-2021-057460), 2022-06-20
Supplement: bmjopen-2021-057460.draft_revisions.pdf [file bmjopen-2021-057460.draft_revisions.pdf]

# BMJ Open

BMJ Open is committed to open peer review. As part of this commitment we make the peer review history of every article we publish publicly available.

When an article is published we post the peer reviewers' comments and the authors' responses online. We also post the versions of the paper that were used during peer review. These are the versions that the peer review comments apply to.

The versions of the paper that follow are the versions that were submitted during the peer review process. They are not the versions of record or the final published versions. They should not be cited or distributed as the published version of this manuscript.

BMJ Open is an open access journal and the full, final, typeset and author-corrected version of record of the manuscript is available on our site with no access controls, subscription charges or pay-per-view fees (<http://bmjopen.bmj.com>).

If you have any questions on BMJ Open's open peer review process please email [info.bmjopen@bmj.com](mailto:info.bmjopen@bmj.com)

# BMJ Open

## Alpha-2-adrenergic receptor agonists for the prevention of delirium and cognitive decline after open heart surgery (ALPHA2PREVENT): protocol for a multicentre randomised controlled trial

|                               |                                                                                                                                                                                                                                                                                                                                                                                                                                                                                                                                                                                                                                                                                                                                                                                                                                                                                                                                                                                                                                                                                                                                                                                                                                                                                                                                                                                                                                                                                                                                                                                                                                                                                                                                                                                                                                                                                                                                                                                                                                                                                                                                                                                          |
|-------------------------------|------------------------------------------------------------------------------------------------------------------------------------------------------------------------------------------------------------------------------------------------------------------------------------------------------------------------------------------------------------------------------------------------------------------------------------------------------------------------------------------------------------------------------------------------------------------------------------------------------------------------------------------------------------------------------------------------------------------------------------------------------------------------------------------------------------------------------------------------------------------------------------------------------------------------------------------------------------------------------------------------------------------------------------------------------------------------------------------------------------------------------------------------------------------------------------------------------------------------------------------------------------------------------------------------------------------------------------------------------------------------------------------------------------------------------------------------------------------------------------------------------------------------------------------------------------------------------------------------------------------------------------------------------------------------------------------------------------------------------------------------------------------------------------------------------------------------------------------------------------------------------------------------------------------------------------------------------------------------------------------------------------------------------------------------------------------------------------------------------------------------------------------------------------------------------------------|
| Journal:                      | <i>BMJ Open</i>                                                                                                                                                                                                                                                                                                                                                                                                                                                                                                                                                                                                                                                                                                                                                                                                                                                                                                                                                                                                                                                                                                                                                                                                                                                                                                                                                                                                                                                                                                                                                                                                                                                                                                                                                                                                                                                                                                                                                                                                                                                                                                                                                                          |
| Manuscript ID                 | bmjopen-2021-057460                                                                                                                                                                                                                                                                                                                                                                                                                                                                                                                                                                                                                                                                                                                                                                                                                                                                                                                                                                                                                                                                                                                                                                                                                                                                                                                                                                                                                                                                                                                                                                                                                                                                                                                                                                                                                                                                                                                                                                                                                                                                                                                                                                      |
| Article Type:                 | Protocol                                                                                                                                                                                                                                                                                                                                                                                                                                                                                                                                                                                                                                                                                                                                                                                                                                                                                                                                                                                                                                                                                                                                                                                                                                                                                                                                                                                                                                                                                                                                                                                                                                                                                                                                                                                                                                                                                                                                                                                                                                                                                                                                                                                 |
| Date Submitted by the Author: | 17-Sep-2021                                                                                                                                                                                                                                                                                                                                                                                                                                                                                                                                                                                                                                                                                                                                                                                                                                                                                                                                                                                                                                                                                                                                                                                                                                                                                                                                                                                                                                                                                                                                                                                                                                                                                                                                                                                                                                                                                                                                                                                                                                                                                                                                                                              |
| Complete List of Authors:     | <p>Neerland, Bjørn; Oslo University Hospital, Department of Geriatric Medicine</p> <p>Busund, Rolf; University Hospital of North Norway, Department of Cardiothoracic and Vascular Surgery; UiT The Arctic University of Norway, Institute of Clinical Medicine</p> <p>Haaverstad, Rune; Haukeland University Hospital, Heart Disease; University of Bergen, Clinical Science</p> <p>Helbostad, Jorunn; Norwegian University of Science and Technology</p> <p>Landsverk, Svein Aslak; Oslo University Hospital, Department of Anaesthesiology</p> <p>Martinaityte, Ieva; UiT The Arctic University of Norway; University Hospital of North Norway, Department of Geriatric medicine</p> <p>Norum, Hilde Margrethe; Oslo University Hospital, Department of Anaesthesiology; Oslo University Hospital, Department of Research and Development</p> <p>Ræder, Johan ; Universitetet i Oslo Institutt for klinisk medisin, Anesthesiology</p> <p>Selbaek, Geir; Innlandet Hospital Trust, Centre for Old Age Psychiatric Research; Oslo University Hospital, Department of Geriatric Medicine</p> <p>Skaar, Elisabeth; Haukeland University Hospital, Department of Heart Disease</p> <p>Skjærvold, Nils Kristian; Norwegian University of Science and Technology, Department of Circulation and Medical Imaging; Trondheim University Hospital, Department of Anesthesia and Intensive Care Medicine</p> <p>Skovlund, Eva; Norwegian University of Science and Technology</p> <p>Slooter, Arjen ; University Medical Centre Utrecht Brain Centre; Vrije Universiteit Brussel</p> <p>Svendsen, Øyvind Sverre; Haukeland University Hospital, Department of Anesthesia and Intensive Care; University of Bergen, Department of Clinical Medicine</p> <p>Tønnessen, Theis; University of Oslo, Institute of Clinical Medicine; Oslo University Hospital, Department of Cardiothoracic Surgery</p> <p>Wahba, Alexander; Norwegian University of Science and Technology, Department of Circulation and Medical Imaging; Trondheim University Hospital</p> <p>Zetterberg, Henrik; University of Gothenburg Sahlgrenska Academy, Department of Psychiatry and Neurochemistry; UCL Institute of</p> |

1  
2  
3  
4  
5  
6  
7  
8  
9  
10  
11  
12  
13  
14  
15  
16  
17  
18  
19  
20  
21  
22  
23  
24  
25  
26  
27  
28  
29  
30  
31  
32  
33  
34  
35  
36  
37  
38  
39  
40  
41  
42  
43  
44  
45  
46  
47  
48  
49  
50  
51  
52  
53  
54  
55  
56  
57  
58  
59  
60

|           |                                                                                                                                                                                          |
|-----------|------------------------------------------------------------------------------------------------------------------------------------------------------------------------------------------|
|           | Neurology, Department of Neurodegenerative Disease<br>Wyller, Torgeir; Oslo University Hospital, Department of Geriatric<br>Medicine; University of Oslo, Institute of Clinical Medicine |
| Keywords: | Cardiac surgery < SURGERY, Delirium & cognitive disorders <<br>PSYCHIATRY, Adult anaesthesia < ANAESTHETICS, GERIATRIC<br>MEDICINE                                                       |
|           |                                                                                                                                                                                          |

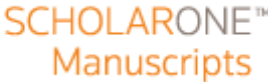

1  
2  
3 1 **TITLE PAGE**  
4  
5

6 2 **Title:** Alpha-2-adrenergic receptor agonists for the prevention of delirium and cognitive decline after  
7  
8 3 open heart surgery (ALPHA2PREVENT): protocol for a multicentre randomised controlled trial  
9  
10

11 4  
12  
13  
14 5 **Authors and affiliations:**  
15

16  
17 6 Neerland, Bjørn Erik 1  
18

19  
20 7 Busund, Rolf 2,3  
21  
22

23 8 Haaverstad, Rune 4,5  
24  
25

26 9 Helbostad, Jorunn Lægdheim 6  
27  
28

29  
30 10 Landsverk, Svein Aslak 7  
31

32 11 Martinaityte, Ieva 3,8  
33  
34

35 12 Norum, Hilde Margrethe 7, 9  
36  
37

38 13 Ræder, Johan 7,10  
39  
40

41 14 Selbæk, Geir 1, 10, 11  
42  
43

44 15 Skaar, Elisabeth 12  
45  
46

47 16 Skjærvold, Nils Kristian 13, 14  
48  
49

50 17 Skovlund, Eva 15  
51  
52

53 18 Slooter, Arjen 16, 17  
54  
55

56 19 Svendsen, Øyvind Sverre 18, 19  
57  
58  
59  
60

- 1  
2  
3 20 Tønnessen, Theis 10, 20  
4  
5  
6 21 Wahba, Alexander 13, 21  
7  
8  
9 22 Zetterberg, Henrik 22, 23, 24, 25, 26  
10  
11  
12 23 Wyller, Torgeir Bruun 1, 10  
13  
14  
15 24  
16  
17  
18 25 1) Oslo Delirium Research Group, Department of Geriatric Medicine, Oslo University Hospital,  
19  
20  
21 26 Oslo, Norway  
22  
23 27 2) Department of Cardiothoracic and Vascular Surgery, University Hospital of North Norway,  
24  
25 28 Tromsø, Norway  
26  
27 29 3) Institute of Clinical Medicine, UiT The Arctic University of Norway, Tromsø, Norway.  
28  
29 30 4) Section of Cardiothoracic Surgery, Department of Heart Disease, Haukeland University  
30  
31 31 Hospital, Bergen, Norway  
32  
33 34 32 5) Institute of Clinical Science, Medical Faculty, University of Bergen, Bergen, Norway  
34  
35  
36 33 6) Department of Neuromedicine and Movement Science, Faculty of Medicine and Health  
37  
38 34 Sciences, Norwegian University of Science and Technology, Trondheim, Norway  
39  
40 35 7) Department of Anaesthesiology, Division of Emergencies and Critical Care, Oslo University  
41  
42 36 Hospital, Oslo, Norway  
43  
44 37 8) Department of Geriatric medicine, University Hospital of North Norway, Tromsø, Norway  
45  
46 38 9) Department of Research and Development, Division of Emergencies and Critical Care, Oslo  
47  
48 39 University Hospital, Oslo, Norway  
49  
50 40 10) Institute of Clinical Medicine, University of Oslo, Oslo, Norway  
51  
52 41 11) Norwegian National Advisory Unit on Ageing and Health, Vestfold Hospital Trust, Tønsberg,  
53  
54 42 Norway.  
55  
56 43 12) Department of Heart Disease, Haukeland University Hospital, Bergen, Norway  
57  
58  
59  
60

- 1  
2  
3 44 13) Department of Circulation and Medical Imaging, Norwegian University of Science and  
4  
5 45 Technology, Trondheim, Norway  
6  
7 46 14) Department of Anesthesia and Intensive Care Medicine, Trondheim University Hospital,  
8  
9 47 Trondheim, Norway  
10  
11 48 15) Department of Public Health and Nursing, Norwegian University of Science and Technology,  
12  
13 49 Trondheim, Norway  
14  
15 50 16) Department of Intensive Care Medicine and UMC Utrecht Brain Center, University Medical  
16  
17 51 Center Utrecht, Utrecht University, Utrecht, the Netherlands  
18  
19 52 17) Department of Neurology, UZ Brussel and Vrije Universiteit Brussel, Brussels, Belgium  
20  
21 53 18) Department of Anesthesia and Intensive Care, Haukeland University Hospital, Bergen,  
22  
23 54 Norway  
24  
25 55 19) Department of Clinical Medicine, University of Bergen, Bergen, Norway  
26  
27 56 20) Department of Cardiothoracic Surgery, Oslo University Hospital, Oslo, Norway  
28  
29 57 21) Clinic of Cardiothoracic Surgery, Trondheim University Hospital, Trondheim, Norway  
30  
31 58 22) Department of Psychiatry and Neurochemistry, Institute of Neuroscience and Physiology, the  
32  
33 59 Sahlgrenska Academy at the University of Gothenburg, Mölndal, Sweden  
34  
35 60 23) Clinical Neurochemistry Laboratory, Sahlgrenska University Hospital, Mölndal, Sweden  
36  
37 61 24) Department of Neurodegenerative Disease, UCL Institute of Neurology, Queen Square,  
38  
39 62 London, UK  
40  
41 63 25) UK Dementia Research Institute at UCL, London, UK  
42  
43 64 26) Hong Kong Center for Neurodegenerative Diseases, Hong Kong, China  
44  
45  
46  
47  
48  
49  
50

51 **Corresponding author:** Dr. Bjørn Erik Neerland ([bjonee@ous-hf.no](mailto:bjonee@ous-hf.no))  
52  
53

54 **Address:** Oslo Delirium Research Group, Department of Geriatric Medicine, Oslo University Hospital,  
55  
56 Pb 4950 Nydalen, 0424 Oslo, Norway  
57  
58

59 **Telephone:** +47 90078979  
60

1  
2  
3 69 **Twitter:** Bjørn Erik Neerland @beneerland  
4  
5

6 70 **ORCID number:** 0000-0001-5335-9146  
7  
8

9 71 **Other ORCID numbers:**  
10  
11

12 72 Rune Haaverstad: 0000-0002-3242-7602  
13  
14

15 73 Jorunn L Helbostad: 0000-0003-0214-9290  
16  
17

18 74 Svein Aslak Landsverk: 0000-0002-93445708  
19  
20

21 75 Ieva Martinaityte: 0000-0002-6873-2852  
22  
23

24 76 Hilde Margrethe Norum: 0000-0001-8123-7488  
25  
26

27 77 Geir Selbæk: 0000-0001-6511-8219  
28  
29

30 78 Nils Kristian Skjærvold: 0000-0002-0085-7042  
31  
32

33 79 Eva Skovlund: 0000-0002-2997-6141  
34  
35

36 80 Arjen Slooter: 0000-0003-0804-8378  
37  
38

39 81 Øyvind Sverre Svendsen: 0000-0003-3553-9084  
40  
41

42 82 Alexander Wahba: 0000-0001-7838-8162  
43  
44

45 83 Henrik Zetterberg: 0000-0003-3930-4354  
46  
47

48 84 Torgeir Bruun Wyller: 0000-0002-0330-9471  
49  
50

51  
52 85  
53

54  
55 86  
56

57  
58 87 **Word count:** Abstract = 274 words. Body = 4002 words  
59  
60

1  
2  
3 88  
4  
5

6 89 **Key words:** delirium, prevention, dexmedetomidine, clonidine, cardiac surgery, frailty, older,  
7

8 90 cognitive decline  
9

10  
11 91  
12

13  
14 92  
15  
16  
17  
18  
19  
20  
21  
22  
23  
24  
25  
26  
27  
28  
29  
30  
31  
32  
33  
34  
35  
36  
37  
38  
39  
40  
41  
42  
43  
44  
45  
46  
47  
48  
49  
50  
51  
52  
53  
54  
55  
56  
57  
58  
59  
60

For peer review only



1  
2  
3 93 **ABSTRACT**  
4  
5

6 94 **Introduction:** Postoperative delirium is common in older cardiac surgery patients and associated with  
7  
8 95 negative short-term and long-term outcomes. The alpha-2-adrenergic receptor agonist  
9  
10 96 dexmedetomidine shows promise as prophylaxis and treatment for delirium in intensive care units  
11  
12 97 (ICU) and postoperative settings. Clonidine has similar pharmacological properties and can be  
13  
14 98 administered both parenterally and orally. We aim to study whether repurposing of clonidine can  
15  
16 99 represent a novel treatment option for delirium, and the possible effects of dexmedetomidine and  
17  
18 100 clonidine on long-term cognitive trajectories, motor activity patterns and biomarkers of neuronal  
19  
20 101 injury, and whether these effects are associated with frailty status.  
21  
22

23  
24 102 **Methods and analysis:** This five-centre, double blind randomised controlled trial will include 900  
25  
26 103 cardiac surgery patients aged 70+. Participants will be randomized 1:1:1 to dexmedetomidine or  
27  
28 104 clonidine or placebo. The study drug will be given as a continuous intravenous infusion from the start  
29  
30 105 of cardiopulmonary bypass, at a rate of 0.4 µg/kg/h. The infusion rate will be decreased to 0.2  
31  
32 106 µg/kg/h postoperatively and be continued until discharge from the ICU or 24 hours postoperatively,  
33  
34 107 whichever happens first.  
35  
36

37  
38 108 Primary endpoint is the 7-day cumulative incidence of postoperative delirium (Diagnostic and  
39  
40 109 Statistical Manual of Mental Disorders, 5th edition). Secondary endpoints include the composite  
41  
42 110 endpoint of coma, delirium or death, delirium severity and motor activity patterns, levels of  
43  
44 111 circulating biomarkers of neuronal injury, cognitive function and frailty status 1 and 6 months after  
45  
46 112 surgery.  
47  
48

49  
50 113 **Ethics and dissemination:** This trial is approved by the Regional Committee for Ethics in Medical  
51  
52 114 Research in Norway (South-East Norway) and by the Norwegian Medicines Agency. Dissemination  
53  
54 115 plans include publication in peer-reviewed medical journals and presentation at scientific meetings.  
55  
56

57  
58 116 **Trial registration number:** EudraCT: 2021-001645-12. ClinicalTrials.gov: NCT05029050  
59  
60

1  
2  
3 117 **STRENGTHS AND LIMITATIONS OF THIS STUDY**  
4  
5

- 6 118 • This multicentre trial will provide evidence for prophylactic efficacy of dexmedetomidine and  
7  
8 119 clonidine in reducing the incidence of postoperative delirium as well as decline in cognitive  
9  
10 120 function 1 and 6 months postoperatively in older cardiac surgical patients  
11  
12  
13 121 • Inclusion of preoperative frailty assessments will provide evidence for frailty as a predictive  
14  
15 122 marker of treatment effect  
16  
17 123 • The analysis of biomarkers will provide insights into the neural mechanisms in postoperative  
18  
19 124 delirium and long-term cognitive dysfunction  
20  
21  
22 125 • The analysis of activity by accelerometers will provide insight into motor activity patterns in  
23  
24 126 subtypes of delirium  
25  
26 127 • The dose of the active drugs may potentially be too low or the duration of treatment too  
27  
28  
29 128 short in order to show effects  
30  
31  
32  
33  
34  
35  
36  
37  
38  
39  
40  
41  
42  
43  
44  
45  
46  
47  
48  
49  
50  
51  
52  
53  
54  
55  
56  
57  
58  
59  
60

## 129 BACKGROUND

130 Delirium represents an acute change in awareness, attention and cognition, precipitated by an acute  
131 illness, trauma, intoxication or surgery.<sup>1,2</sup> Common additional features are agitation, hallucinations  
132 and poor compliance with medical treatment and care.

133 Delirium appears in all parts of the health care service, including intensive care units (ICUs) and  
134 postoperative settings, regular hospital wards, nursing homes, home nursing services and palliative  
135 departments. In a recent meta-analysis, Greaves and co-workers found a delirium prevalence of 24%  
136 postoperatively after coronary artery bypass grafting (CABG) surgery, aggregated over all age  
137 groups.<sup>3</sup> In a Norwegian study of patients  $\geq 80$  years undergoing open aortic valve replacement, the  
138 prevalence of postoperative delirium was above 60%.<sup>4</sup> Open heart surgery patients are especially  
139 susceptible to delirium. Probable causes may be established cardiovascular disease, micro-embolism  
140 from cardiopulmonary bypass (CPB), perioperative circulatory changes including ischemia-  
141 reperfusion injuries, systemic inflammation, blood-brain barrier disruption and very deep  
142 anaesthesia.<sup>5,6</sup>

143 Delirium is difficult to handle in clinical settings, increases length of hospital stay and the need for  
144 long-term care,<sup>7,8,9</sup> is expensive for the society,<sup>10</sup> represents a frightening experience for the patient  
145 and the relatives,<sup>11</sup> and is an independent risk factor for death after cardiac surgery.<sup>12</sup> Delirium is an  
146 independent risk factor for cognitive decline in older adults, and induces a more rapid trajectory of  
147 deterioration in those who already have dementia.<sup>13,14</sup>

148 Frailty is a risk factor for delirium,<sup>15</sup> but less is known regarding how frailty assessments can guide  
149 prophylactic and therapeutic measures and shared decision making.<sup>16</sup> Frailty is a state of impaired  
150 physiologic reserve and decreased resistance to stressors, which increases the risk of an adverse  
151 outcome.<sup>17,18</sup> It is a consequence of cumulative decline in many physiological systems.

1  
2  
3 152 Conventionally, delirium has been separated into hyperactive and hypoactive subtypes based on  
4  
5 153 clinical impression,<sup>19</sup> but recent research using body-worn sensors indicates a more heterogeneous  
6  
7 154 pattern of motor activity across the clinical delirium motor subtypes.<sup>20 21</sup> Body-worn motor activity  
8  
9  
10 155 sensors may provide objective measures of the effectiveness of delirium treatment intervention, by  
11  
12 156 classifying motor activity patterns in delirious patients. A small postoperative study on cardiac  
13  
14 157 surgery patients showed the possibility of detecting the amount of movement in sedated patients.<sup>22</sup>

15  
16  
17 158 Routinely, several actions are taken in perioperative care to minimize the risk of delirium, such as  
18  
19 159 appropriate management of pain and minimizing the use of sedative drugs like benzodiazepines.  
20  
21  
22 160 Further, non-pharmacological multicomponent interventions are essential,<sup>23</sup> but there is currently no  
23  
24 161 compelling evidence to support the use of specific prophylactic pharmacological measures in routine  
25  
26 162 perioperative care for patients at risk of postoperative delirium.<sup>24</sup>

27  
28  
29 163 However, dexmedetomidine, a parenterally administered alpha-2-adrenergic receptor agonist that  
30  
31 164 attenuates sympathetic nervous system activity, shows promise as prophylaxis and treatment for  
32  
33  
34 165 delirium in ICUs and postoperative settings.<sup>25 26</sup> In a recent meta-analysis, perioperative use of  
35  
36 166 dexmedetomidine in various surgical procedures was associated with a lower incidence of  
37  
38 167 postoperative delirium. The relative risk (RR) and 95% confidence interval (CI) was 0.52 (0.39-0.70)  
39  
40 168 when compared with placebo.<sup>25</sup> A meta-analysis in cardiac surgery patients showed that  
41  
42 169 dexmedetomidine could reduce the risk of postoperative delirium (Odds Ratio 0.56, 95% CI 0.36-  
43  
44 170 0.89)<sup>27</sup>. Among newer studies, some,<sup>28-31</sup> but not all,<sup>32 33</sup> have found a beneficial short time effect on  
45  
46 171 the incidence of delirium. Effects upon long time cognitive trajectories have so far only been  
47  
48  
49 172 assessed in two studies, with conflicting results.<sup>34 35</sup> Nevertheless, the use of dexmedetomidine in  
50  
51 173 ICUs is rapidly increasing.<sup>26</sup>

52  
53  
54 174 An alternative agent is clonidine, which has similar pharmacological properties to  
55  
56 175 dexmedetomidine,<sup>36</sup> even though it's alpha-2-adrenergic selectivity is lower.<sup>37</sup> Clonidine can be  
57  
58 176 administered both parenterally and orally, thus potentially widening its clinical usefulness.<sup>36 37</sup>  
59  
60

1  
2  
3 177 Clonidine was originally launched as an antihypertensive agent, but it is also used as an analgesic  
4  
5 178 drug. Further, clonidine has a long tradition as a sedative in patients with hyperactive delirium, and is  
6  
7 179 used by several anaesthesiologists and intensivists.<sup>38</sup> This practice is based on their clinical  
8  
9  
10 180 experiences and knowledge on the drug's properties, but is so far not supported by placebo-  
11  
12 181 controlled clinical trials. A pilot study indicated that clonidine infusion during the period of weaning  
13  
14 182 from mechanical ventilation after surgery for aortic dissection may reduce the severity of delirium.<sup>39</sup>  
15  
16 183 A recent study compared clonidine with dexmedetomidine postoperatively after CABG and found  
17  
18 184 better effect on risk and duration of delirium of dexmedetomidine. Since no placebo control group  
19  
20  
21 185 was included, that study could not assess potential effects of clonidine.<sup>40</sup>  
22  
23  
24 186 Thus, there is a need for prospective large-scale studies on the potential prophylactic effect of alpha-  
25  
26 187 2-adrenergic receptor agonists on delirium in susceptible patients. The aims of the present planned  
27  
28 188 trial are to study 1) whether repurposing of clonidine can represent a novel treatment option for  
29  
30 189 delirium, and 2) the possible effects of dexmedetomidine and clonidine on long-term cognitive  
31  
32 190 trajectories, motor activity patterns, patient rated outcome measures and biomarkers of neuronal  
33  
34  
35 191 injury, and 3) whether these effects are associated with frailty status.  
36  
37  
38 192  
39  
40  
41 193  
42  
43  
44  
45  
46  
47  
48  
49  
50  
51  
52  
53  
54  
55  
56  
57  
58  
59  
60

1  
2  
3 194 **METHODS AND ANALYSIS**  
4  
5

6 195 **Study design**  
7  
8

9 196 ALPHA2PREVENT is a nationwide five-centre, double blind randomised controlled trial (RCT). Patients  
10  
11 197 aged 70+ scheduled for open heart surgery will be randomized 1:1:1 to dexmedetomidine or  
12  
13 198 clonidine or placebo. The patients will be cognitively assessed preoperatively, then assessed for any  
14  
15 199 symptoms of delirium according to the Diagnostic and Statistical Manual of Mental Disorders, 5th  
16  
17 200 edition (DSM-5) criteria<sup>41</sup> or subsyndromal delirium<sup>42</sup> postoperatively, and finally assessed for  
18  
19 201 cognitive function after 1 and 6 months (figure 1).  
20  
21  
22

23 202 **Study locations**  
24  
25

26 203 The trial will be carried out at Oslo University Hospital (Ullevaal and Rikshospitalet) in Oslo,  
27  
28 204 Haukeland University Hospital in Bergen, Trondheim University Hospital in Trondheim, and the  
29  
30 205 University Hospital of Northern Norway in Tromsø, all in Norway.  
31  
32  
33

34 206 **Participants, randomisation and blinding**  
35  
36

37 207 Patients will be assessed for eligibility and asked for participation in cooperation with the responsible  
38  
39 208 thoracic surgeons or anaesthesiologists. A full listing of trial inclusion and exclusion criteria is  
40  
41 209 displayed in table 1. Participants must be  $\geq 70$  years old, accepted for cardiac surgery with CPB and  
42  
43 210 capable of giving signed informed consent. The surgical procedures may constitute CABG, valve  
44  
45 211 replacement, surgery on the ascending aorta, or combinations of these. Main exclusion criteria are  
46  
47 212 bradycardia, uncontrolled hypotension, ischemic stroke the last month or acute coronary syndrome  
48  
49 213 last 24 hours,<sup>43</sup> left ventricular ejection fraction  $< 40\%$ , severe renal failure or hepatic dysfunction,  
50  
51 214 sepsis, planned deep hypothermia and circulatory arrest, as well as emergency surgery.  
52  
53  
54  
55

56 215 **Table 1. Inclusion and exclusion criteria**  
57  
58  
59  
60

|                                                                                                                                                                                                                                                                                                                                                                                                                                                                                   |                                                                                                                                                                                                                                                                                                                                                                                                                                                                                                                                                                                                                                                                                                                                                                                                                                                                                                                                                                                                                |
|-----------------------------------------------------------------------------------------------------------------------------------------------------------------------------------------------------------------------------------------------------------------------------------------------------------------------------------------------------------------------------------------------------------------------------------------------------------------------------------|----------------------------------------------------------------------------------------------------------------------------------------------------------------------------------------------------------------------------------------------------------------------------------------------------------------------------------------------------------------------------------------------------------------------------------------------------------------------------------------------------------------------------------------------------------------------------------------------------------------------------------------------------------------------------------------------------------------------------------------------------------------------------------------------------------------------------------------------------------------------------------------------------------------------------------------------------------------------------------------------------------------|
| <p>Participants are eligible to be included in the study only if all of the following criteria apply:</p>                                                                                                                                                                                                                                                                                                                                                                         | <p>Participants are excluded from the study if any of the following criteria apply:</p>                                                                                                                                                                                                                                                                                                                                                                                                                                                                                                                                                                                                                                                                                                                                                                                                                                                                                                                        |
| <p>1. Participant must be <math>\geq 70</math> years old at the time of signing the informed consent.</p> <p>2. Participant must be accepted for cardiac surgery with cardiopulmonary bypass. The surgical procedures may constitute 1) coronary bypass grafting, 2) tricuspid, mitral, or aortic valve replacement or repair, 3) the combination of 1 and 2, and 4) surgery on the ascending aorta.</p> <p>3. Participant must be capable of giving signed informed consent.</p> | <p>4. Preoperative delirium (present at time of potential inclusion)</p> <p>5. Known hypersensitivity to the active ingredient or components of the product</p> <p>6. Bradycardia due to sick-sinus-syndrome, 2nd or 3rd degree AV-block (if not treated with pacemaker) or any other reason causing HR <math>&lt; 50</math> bpm at time of inclusion</p> <p>7. Uncontrolled hypotension</p> <p>8. Ischemic stroke or transitory ischemic attack the last month or critical peripheral ischemia</p> <p>9. Acute coronary syndrome last 24 hours. Acute coronary syndrome is defined according to international guidelines</p> <p>10. Left ventricular ejection fraction <math>&lt; 40\%</math></p> <p>11. Severe renal impairment (estimated GFR <math>&lt; 20</math> ml/min) or expected requirement for renal replacement therapy</p> <p>12. Severe hepatic dysfunction (liver enzyme three times the upper limit of normal together with a serum albumin concentration below the normal reference limit</p> |

|  |                                                                                                                                                                                                                                                                                                                                                                                                                                                                                                                                                               |
|--|---------------------------------------------------------------------------------------------------------------------------------------------------------------------------------------------------------------------------------------------------------------------------------------------------------------------------------------------------------------------------------------------------------------------------------------------------------------------------------------------------------------------------------------------------------------|
|  | <p>13. Reduced peripheral autonomous activity (e.g., spinal cord injury)</p> <p>14. Current use of tricyclic antidepressants, monoamine reuptake inhibitors or ciclosporin</p> <p>15. Endocarditis or sepsis</p> <p>16. Pheochromocytoma</p> <p>17. Planned deep hypothermia and circulatory arrest</p> <p>18. Emergency surgery, defined as less than 24 hours from admission to surgery</p> <p>19. Previously included in this study</p> <p>20. Not speaking or reading Norwegian</p> <p>21. Any other condition as evaluated by the treating physician</p> |
|--|---------------------------------------------------------------------------------------------------------------------------------------------------------------------------------------------------------------------------------------------------------------------------------------------------------------------------------------------------------------------------------------------------------------------------------------------------------------------------------------------------------------------------------------------------------------|

216 AV-block, atrioventricular block; HR, heart rate; GFR, glomerular filtration rate

217 Consenting patients will be randomly assigned 1:1:1, to dexmedetomidine, clonidine or placebo.

218 Randomization will be computer generated with random permuted block sizes of 2 or 4, and  
 219 stratified according to study centre. Allocation will be concealed by a web-based system that can be  
 220 accessed no earlier than 3 days before surgery. The study drug will be prepared by an otherwise  
 221 uninvolved research associate, ensuring that investigators, clinicians and outcome assessors are  
 222 blinded to the group assignment.

#### 223 **Data collected at study entry**

224 The data collection will take place in connection with routine clinical care at the relevant hospital  
 225 wards and the ICU (table 2). According to the selection criteria, electrocardiogram (ECG),



226 creatinine/estimated Glomerular Filtration Rate (eGFR), liver transaminases, albumin, and a recent  
 227 echo-cardiography will be required, as well as a screening for preoperative delirium. At study entry,  
 228 demographic data, medical history including cardiovascular and non-cardiovascular co-morbidities,  
 229 prescription drugs used, sensory impairment, presence or absence of any fall within the past year,  
 230 functional status including activities of daily living, surgical site and indication for surgery will be  
 231 obtained. Haemodynamic variables, body mass index, American Society of Anesthesiologists Physical  
 232 Status (ASA)-classification and Euroscore II will be recorded, and routine blood samples taken prior to  
 233 surgery will be registered. Blood samples for biomarkers will be drawn preoperatively and on  
 234 postoperative day 1, 3 and 5. Included patients will undergo preoperative cognitive tests and physical  
 235 tests for assessment of frailty. Patient rated outcome measures (PROMs) will be assessed by use of  
 236 the Norwegian version of the EuroQol 5 Dimension 5 Level (EQ-5D-5L) questionnaire.<sup>44</sup> The same  
 237 tests and questionnaires will be used also after 1 and 6 months, for assessment of cognitive and  
 238 functional trajectories.

239 **Table 2. Study procedures**

| Procedure                              | Screening<br>(up to 30<br>days before<br>Day 1) | Intervention Period [Days] |   |   |   |   |   |   |   | Registrations<br>during hospital<br>stay | 1 and 6<br>months |   |
|----------------------------------------|-------------------------------------------------|----------------------------|---|---|---|---|---|---|---|------------------------------------------|-------------------|---|
|                                        |                                                 | -1<br>to<br>-3             | 1 | 2 | 3 | 4 | 5 | 6 | 7 |                                          |                   | 8 |
| Assessment of eligibility              | X                                               |                            |   |   |   |   |   |   |   |                                          |                   |   |
| Informed consent and<br>randomization  | X                                               |                            |   |   |   |   |   |   |   |                                          |                   |   |
| Demographic data                       |                                                 | X                          |   |   |   |   |   |   |   |                                          |                   | X |
| Physical examination                   |                                                 | X                          |   |   |   |   |   |   |   |                                          |                   |   |
| Past and current medical<br>conditions | X                                               | X                          |   |   |   |   |   |   |   |                                          |                   | X |
| Prescribed medications                 | X                                               | X                          |   |   |   |   |   |   |   |                                          |                   | X |



|                                                       |  |   |         |   |   |
|-------------------------------------------------------|--|---|---------|---|---|
| Death                                                 |  |   |         | X | X |
| Body-worn accelerometers<br>(Trondheim patients only) |  | X | ←=====→ | X | X |

240

241 ProBNP, Pro B-type Natriuretic Peptide; ECG, electrocardiogram; PROM, Patient Rated Outcome

242 Measure; ASA-classification, American Society of Anesthesiologists Physical Status Classification; AE,

243 Adverse Event; SAE, Serious AE

244 <sup>a</sup> No delirium assessment at follow-up after 6 months

### 245 **Trial interventions**

246 Dexmedetomidine, clonidine or placebo (saline), will be given as a continuous intravenous infusion,

247 without a loading dose, from the start of CPB, at a rate of 0.4 µg/kg/h for the active drugs. The

248 infusion rate will be decreased to 0.2 µg/kg/h postoperatively and maintained for at least 12 hours

249 after end of surgery. The infusion will be continued until discharge from the ICU or 24 hours

250 postoperatively, whichever happens first. Clinicians are allowed to decrease, pause or stop

251 administration of study medication if clinically indicated, e.g. if the patient is difficult to wake up

252 after surgery or study drug induced hemodynamic instability is suspected.

### 253 **Concomitant therapy and rescue medicine**

254 Patients will not be included if they use tricyclic antidepressants, monoamine reuptake inhibitors or

255 cyclosporine. The perioperative anaesthesia will be given per routine at participating institutions. If

256 delirium develops and pharmacological intervention is needed, the study drug will be stopped, and

257 further treatment will be according to local routines and the treating physician's preferences.

### 258 **Primary endpoint**

259 The primary endpoint for ALPHA2PREVENT is the 7-day cumulative incidence of postoperative

260 delirium. The diagnosis of delirium will be made according to DSM-5 criteria<sup>41</sup> by using a standardized

1  
2  
3 261 procedure developed for our previous study<sup>45</sup> and as recommended by others<sup>46</sup>. The methods are  
4  
5 262 refined in order, in a stepwise approach, to assess presence or absence of the diagnostic criteria in  
6  
7 263 DSM-5 and will be carried out by specially trained research assistants. Level of arousal will be  
8  
9  
10 264 assessed using the Norwegian versions of Richmond Agitation Sedation Scale (RASS)<sup>47</sup> and  
11  
12 265 Observational Scale of Level of Arousal (OSLA).<sup>48</sup> Attention and awareness will be evaluated using  
13  
14 266 objective tests (vigilance “A”-test, months of the years backwards, days of the week backwards, and  
15  
16 267 counting down from 20 to 1)<sup>49</sup> and observations by the examiner of the patient’s distractibility,  
17  
18 268 comprehension and tendency to lose the thread of conversation. Presence of additional cognitive  
19  
20 269 disturbances will be assessed by tests for orientation and recall test of three words (different words  
21  
22 270 for each day), as well as information derived from nursing staff and clinical notes. Acute change in  
23  
24 271 the patient’s mental condition, and fluctuations of any disturbance, will be ascertained through  
25  
26 272 informant history from nursing staff and derived from clinical notes.  
27  
28  
29

30  
31 273 The Norwegian version of the Confusion Assessment Method for Intensive Care Units (CAM-ICU)<sup>50</sup>  
32  
33 274 will be used as a delirium screening tool by the study nurses. The results from each of the CAM-ICU-  
34  
35 275 items, as well as the total CAM-ICU score, will also be used as a source of information for making the  
36  
37 276 final delirium diagnosis.  
38  
39

40  
41 277 Two or more experienced delirium researchers will independently use all available information  
42  
43 278 (including the project assistants’ assessments) on each patient to decide if the DSM-5 criteria for  
44  
45 279 delirium are fulfilled. An interrater agreement for the diagnosis of delirium will be calculated and  
46  
47 280 disagreements will be resolved through discussion.  
48  
49

50  
51 281 Subsyndromal delirium will be defined as evidence of change, in addition to any one of these:  
52  
53 282 altered arousal, attentional deficits, other cognitive change, delusions or hallucinations. DSM-5  
54  
55 283 delirium criteria D and E must be met.  
56  
57

58 284 Postoperative delirium assessment will start as soon as possible after admission to the ICU, and will  
59  
60 285 continue daily until the seventh postoperative day or until discharge from the university hospital,

1  
2  
3 286 whichever happens first. Tests for delirium will also be repeated at the 1-month follow-up, to pick up  
4  
5 287 signs of persistent delirium.  
6  
7

8 288 **Secondary endpoints**  
9

10  
11 289 Secondary endpoints include the composite endpoint of coma, delirium or death, number of delirium  
12  
13 290 days, delirium severity and motor activity patterns, comparison to inclusion of serum concentrations  
14  
15 291 of neurofilament light (NFL) and p-tau181 1, 3 and 5 days postoperatively, as well as change between  
16  
17 292 inclusion and after 1 and 6 months in cognitive function, patient rated health status, frailty status,  
18  
19 293 and comparison of change in frailty status between patients with or without postoperative delirium.  
20  
21 294 We will also assess preoperative frailty status as a predictive marker of effect of dexmedetomidine  
22  
23 295 and clonidine treatment, by studying the interaction between preoperative frailty and treatment on  
24  
25 296 delirium and the other mentioned endpoints.  
26  
27  
28  
29

30 297 All endpoints will be assessed using Norwegian versions of validated instruments: Delirium severity  
31  
32 298 will be measured using CAM-ICU-7,<sup>51</sup> OSLA<sup>48</sup> and RASS;<sup>47</sup> motor activity patterns using body worn  
33  
34 299 accelerometers; cognitive function using Montreal Cognitive Assessment (MoCA),<sup>52</sup> immediate and  
35  
36 300 delayed recall from The Ten Words Memory Task from The Consortium to Establish a Registry for  
37  
38 301 Alzheimer's Disease,<sup>53</sup> Trail Making Test (TMT) version A and B,<sup>54</sup> semantic and phonemic verbal  
39  
40 302 fluency,<sup>55</sup> digit span forwards and backwards (by Wechsler Adult Intelligence Scale);<sup>56</sup> frailty using a  
41  
42 303 comprehensive geriatric assessment-based Frailty Index<sup>57</sup> and Essential Frailty Toolset;<sup>58</sup> and patient  
43  
44 304 rated health status using the EQ-5D-5L questionnaire.<sup>44</sup>  
45  
46  
47  
48

49 305 For assessment of cognitive trajectories, the same cognitive test battery will be performed in a stable  
50  
51 306 phase preoperatively as well as after 1 and 6 months. Information regarding functional status will be  
52  
53 307 obtained from the patient preoperatively and from either the patient or their proxy at follow-up,  
54  
55 308 depending on the patient's ability to provide detailed information.  
56  
57  
58  
59  
60

1  
2  
3 309 For a sub-sample of one hundred patients from the Trondheim cohort, motor activity will be  
4  
5 310 measured by 3D accelerometer inertial sensors (AX3 sensors) (Axivity Ltd., Newcastle, UK) sampled at  
6  
7 311 100 Hz and processed using custom made software. Accelerometers will be attached to the  
8  
9 312 abdomen, the dominant thigh (ventrally, midhigh), and on the dominant wrist pre surgery. Motor  
10  
11 313 activity patterns will be monitored continuously (day and nights) before and the five first days after  
12  
13 314 surgery or until discharge from hospital, and over one week after 1 and 6 months. Sensor data will be  
14  
15 315 analyzed regarding both quantity and quality of movements and compared with the clinical delirium  
16  
17 316 assessments.

### 317 **Biomarkers**

318 In addition to routine blood tests, blood will be taken in the morning for specific study analyses  
319 (serum, plasma and wholeblood) before surgery, and at postoperative day 1, 3 and 5 (or earlier if  
320 discharged before day 5) and frozen at  $-80^{\circ}\text{C}$  locally. Frozen samples will then be shipped to the  
321 coordinating centre (Oslo) to be stored in a biobank at  $-80^{\circ}\text{C}$  for future analyses. The stored blood  
322 samples will be analysed for promising markers such as NFL already known to be associated with  
323 delirium,<sup>59</sup> p-tau181 associated with dementia and delirium,<sup>60-62</sup> and possibly other biomarkers of  
324 neuronal degeneration, neuroinflammation and neurotransmitters,<sup>63-67</sup> using state-of-the-art  
325 ultrasensitive assays to evaluate their association with observed clinical responses to the study drugs.

### 326 **Standardised training**

327 The research assistants across all sites will receive standardized training for all study measures prior  
328 to study initiation, including cognitive tests, delirium assessments and measurements of frailty  
329 indicators. Retraining will be provided as necessary. Detailed instructions and operation manuals in  
330 Norwegian language, including an instruction video for the MoCA, will be made available to all  
331 assessors.

### 332 **Data management and monitoring**

1  
2  
3 333 Participant data will be collected by authorized trained personnel, be recorded on electronic Case  
4  
5 334 Report Forms (CRF) and stored on a password protected database. Paper files will be stored in locked  
6  
7 335 cabinets accessible to team members only. Study monitors will perform ongoing source data  
8  
9  
10 336 verification to confirm that data entered into the CRFs are accurate, complete, and verifiable from  
11  
12 337 source documents; that the safety and rights of participants are being protected; and that the study  
13  
14 338 is being conducted in accordance with the currently approved protocol, International Conference on  
15  
16 339 Harmonization Good Clinical Practice, and all applicable regulatory requirements. Records and  
17  
18 340 documents, including signed Informed Consent Forms, pertaining to the conduct of this study will be  
19  
20  
21 341 retained by the investigators for 15 years after study completion.  
22

23 342

### 24 25 343 **Safety and adverse events management**

26  
27  
28 344 Immediate safety concerns will be handled by the treating anaesthesiologist, who will determine if  
29  
30 345 the participant should continue or discontinue study intervention. Since patients are closely  
31  
32 346 monitored in the perioperative phase of cardiac surgery, potential adverse circulatory effects will be  
33  
34 347 rapidly revealed and corrected;

- 35  
36  
37  
38 348 • Temporal epicardial pacing wires are placed routinely during cardiac surgery, and  
39  
40 349 bradycardia will be treated with atropine and/or pacemaker as per routine.
- 41  
42 350 • Hypotension will be treated at discretion of the treating anaesthesiologists, who are  
43  
44 351 permitted to reduce dose of the study drug as necessary to preserve haemodynamic stability,  
45  
46 352 following guidelines and local routines. A Mean Arterial Pressure (MAP) >55-60mmHg is  
47  
48 353 recommended.
- 49  
50 354 • If not rapid and satisfactory response on other measures is achieved, the treating  
51  
52 355 anaesthesiologist will consider to turn off the infusion/unblind the study.

53  
54  
55  
56  
57 356 Planned time points for safety assessments are provided in table 2.  
58  
59  
60

1  
2  
3 357 The following safety indicators will be compared between the three treatment groups with  
4  
5 358 appropriate statistical methods: Highest and lowest heart rate, systolic, diastolic and mean arterial  
6  
7 359 blood pressure, oxygen saturation, PaO<sub>2</sub>/FiO<sub>2</sub> ratio, number of units for blood transfusion, volume of  
8  
9 360 postoperative blood loss, use of pressor substances, use of rescue medication, number of episodes of  
10  
11 361 bradycardia, hypotension or hypoxemia in need of intervention, perioperative myocardial infarction  
12  
13 362 and stroke, postoperative serum concentrations of troponin and Pro B-type Natriuretic Peptide  
14  
15 363 (proBNP), mortality.

16  
17  
18  
19 364 An independent Data Monitoring Committee will have unblinded access to all data and meet  
20  
21 365 whenever the members find it necessary.<sup>68</sup> Meetings are pre-planned after inclusion of 20, 50, 100  
22  
23 366 and 400 participants, to assess safety indicators and to advise on continuation or termination of the  
24  
25 367 study.

### 26 27 28 29 368 **Current sample size justification**

30  
31  
32 369 The proportion of patients experiencing postoperative delirium after open heart surgery for all ages  
33  
34 370 has been reported to be 24%,<sup>3</sup> and higher in the elderly.<sup>4</sup> Since the lower age limit in our trial is 70  
35  
36 371 years, we estimate that the proportion in the control group will be at least 30%. The most recent  
37  
38 372 meta-analysis of the effect of dexmedetomidine estimates the delirium risk to be reduced to  
39  
40 373 approximately half of the untreated group (*i.e.*, 15%).<sup>25</sup> The effect of clonidine may be weaker but  
41  
42 374 still worth finding. We have thus powered the study based on an estimated delirium incidence of  
43  
44 375 20% in the clonidine group. A sample size of 290 in each group (870 altogether) will give a power of  
45  
46 376 80% with a significance level of 5% to detect such a difference between the clonidine and the  
47  
48 377 placebo group. To account for dropouts, we aim at including 900 patients.

### 49 50 51 52 53 378 **Statistical analysis**

54  
55  
56 379 The primary analysis population will be the intention-to-treat population, and all tests will be two-  
57  
58 380 sided. The primary objective in this study is to prevent postoperative delirium. The primary endpoint



1  
2  
3 381 is the cumulative incidence of postoperative delirium. The endpoint will be registered when the  
4  
5 382 patient is diagnosed with delirium or receives rescue medication for delirium. The postoperative  
6  
7 383 observation time will vary between patients, as time to discharge or transfer to other hospitals will  
8  
9  
10 384 be different. We will thus estimate cumulative incidence by the Kaplan Meier estimator with time to  
11  
12 385 first delirium as the dependent variable and compare time to event curves between treatments by  
13  
14 386 the logrank test. Patients who are discharged from the university hospital during the observation  
15  
16 387 period or reach the end of the observation period (7 days) without having developed delirium, are  
17  
18 388 regarded as censored. We consider that there is no risk that allocation to treatment group will  
19  
20  
21 389 influence the risk of being censored. Those who die, will also be regarded as censored in the primary  
22  
23 390 analysis, but we will carry out a secondary analysis with the combined endpoint *death or delirium*.  
24  
25 391 The same approach will be applied for those who are comatose, and thus impossible to evaluate for  
26  
27 392 delirium. Additional analyses may also include estimating the incidence of delirium treating deaths as  
28  
29 393 a competing risk by the Fine and Gray method.  
30  
31  
32  
33 394 All analyses will be adjusted for variables applied in the stratified randomization.  
34  
35  
36 395 Sensitivity analyses will be carried out by estimating hazard ratios using Cox' proportional hazards  
37  
38 396 model to adjust for potential imbalance of prognostic factors between treatment groups.  
39  
40  
41 397 Secondary endpoints as the cumulative incidence of death, coma or postoperative delirium will be  
42  
43 398 analysed using the Kaplan Meier estimator and the logrank test as above. Additional analyses by Cox'  
44  
45 399 proportional hazards model may also be performed. Mean duration of delirium; severity of delirium;  
46  
47 400 combination of duration and severity of delirium; cognitive tests after 1 and 6 months; EQ-5D-5L  
48  
49 401 scores after 1 and 6 months; and postoperative plasma concentrations of NFL and p-tau181 will be  
50  
51 402 compared between treatments by linear mixed models with time, treatment group, and strata as  
52  
53 403 fixed factors and constraining the means to be equal in all groups at baseline.  
54  
55  
56  
57  
58 404 Frailty as risk factor for delirium and for adverse effects of the study medication, will be analysed by  
59  
60 405 linear or logistic regression (as appropriate), adjusted for other known risk factors. The association

1  
2  
3 406 between frailty and delirium will be analysed by adding frailty as a covariate in a Cox'proportional  
4  
5 407 hazards model on time to delirium (as above). Any interaction between frailty and treatment will also  
6  
7 408 be assessed. The association between frailty and occurrence of adverse events (AE) will be estimated  
8  
9  
10 409 by logistic regression models including covariates as above.

11  
12  
13 410 A detailed statistical analysis plan will be finalized prior to un-blinding.

#### 14 15 16 411 **Ethics and dissemination**

17  
18  
19 412 This trial is approved by the Regional Committee for Ethics in Medical Research in Norway (South-  
20  
21 413 East Norway) and by the Norwegian Medicines Agency, and will be conducted in accordance with  
22  
23 414 consensus ethical principles derived from international guidelines including the Declaration of  
24  
25 415 Helsinki. The results of this study will be published in peer-reviewed medical journals, as well as  
26  
27  
28 416 presented at scientific meetings

#### 29 30 31 417 **Discussion**

32  
33  
34 418 To our knowledge, ALPHA2PREVENT will be the first large randomised controlled multicentre trial to  
35  
36 419 study the prophylactic efficacy of dexmedetomidine and clonidine to reduce the incidence of  
37  
38 420 postoperative delirium in older cardiac surgical patients, as well as reducing cognitive decline 1 and 6  
39  
40  
41 421 months postoperatively.

42  
43  
44 422 One should expect that treatment options that can prevent delirium in a short-term perspective,  
45  
46 423 would also improve the long-term cognitive prognosis. Evidence for such an effect is slowly emerging  
47  
48 424 for non-pharmacological interventions,<sup>69</sup> but is lacking regarding drug treatment.

49  
50  
51 425 Published studies of dexmedetomidine for prevention of delirium in ICU vary largely with respect to  
52  
53 426 dosing regimens, from 0.1<sup>70</sup> to 1.4 µg/kg/h.<sup>32</sup> Many of the authors also administered an initial  
54  
55 427 bolus. In the cardiac surgery context, Turan et al started dexmedetomidine infusion already before  
56  
57  
58 428 start of CPB, gave 0.4 µg/kg/h postoperatively,<sup>33</sup> and found more side effects in the actively treated  
59  
60

1  
2  
3 429 than in the placebo group. We have chosen a careful dosage of 0.4 µg/kg/h peroperatively and 0.2  
4  
5 430 µg/kg/h postoperatively, with no bolus, to reduce the risk of AE, but not so low that we cannot  
6  
7 431 expect an effect on delirium.  
8  
9

10 432 Regarding clonidine, the recommended dosage varies greatly between sources, but is mainly in the  
11  
12 433 range 1-1.5 µg/kg/h.<sup>72</sup> We will dose the drug considerably lower, to avoid side effects. A recent meta-  
13  
14 434 analysis indicates that clonidine and dexmedetomidine are approximately equipotent in similar  
15  
16 435 doses.<sup>73</sup> We have thus chosen the same dosage for clonidine as for dexmedetomidine.  
17  
18  
19

20 436 To further reduce the risk of hemodynamic instability due to the combination of anaesthesiological  
21  
22 437 procedures and study drug at the start of surgery, we will postpone infusion of study drug until the  
23  
24 438 CPB is established.  
25  
26  
27

28 439 Strengths of this trial are the prospective and randomised placebo controlled design, the use of two  
29  
30 440 relevant and much used drugs, inclusion of a high number of patients from multiple sites, adequate  
31  
32 441 statistic strength, repeated cognitive and frailty assessments, use of body-worn accelerometers, and  
33  
34 442 repeated samples of biomarkers. The analyses of biomarkers reflecting neural injury will give us  
35  
36 443 increased understanding of the pathophysiological mechanisms of delirium. Inclusion of preoperative  
37  
38 444 frailty assessments will provide evidence for frailty as a predictive marker of treatment effect and  
39  
40 445 allow for interaction analyses. The use of body-worn accelerometers will provide insight into motor  
41  
42 446 activity patterns in subtypes of delirium.  
43  
44  
45

46 447 This trial has, however, some limitations to consider. The exclusion criteria might limit the  
47  
48 448 generalisability of our findings to other patient populations. There might be a problem with statistical  
49  
50 449 power if the incidence of delirium is lower than expected. The dose of the active drugs might be too  
51  
52 450 low or the duration of treatment be too short in order to show effects. As many patients live far  
53  
54 451 away from the study site, there is a potential for missing long-term data.  
55  
56  
57  
58  
59  
60

1  
2  
3 452 Should the treatment have a positive effect, it would have important beneficial implications for  
4  
5 453 patients, cares and society, such as alleviating acute patient distress and carer burden. If this  
6  
7 454 treatment could reduce longer-term negative effects of delirium, it might have significant  
8  
9 455 consequences for financial and human resource use in health care.  
10  
11  
12  
13 456

14  
15  
16 457 **DECLARATIONS**

17  
18  
19 458 **Patient and public involvement:** Panellists from the user panel established by the Norwegian  
20  
21 459 National Advisory Unit on Ageing and Health, participate in the Trial Advisory Board. They have  
22  
23 460 experience as relatives to patients with dementia or delirium, have given valuable input to the  
24  
25 461 project plans and will follow up during the project period.  
26  
27  
28

29 462 **Ethics approval:** The trial is approved by the Regional Committee for Ethics in Medical Research in  
30  
31 463 Norway (South-east Norway) (REK 262384), June 9th 2021, and by the Norwegian Medicines Agency  
32  
33 464 June 17<sup>th</sup> 2021.  
34  
35

36 465 **Availability of data and materials:** Materials can be available upon reasonable request to the  
37  
38 466 corresponding author. However, availability is dependent on approval from the Regional Ethics  
39  
40 467 Committee and the local data protection officer.  
41  
42  
43

44 468 **Competing interest:** HZ has served at scientific advisory boards and/or as a consultant for Alector,  
45  
46 469 Eisai, Denali, Roche Diagnostics, Wave, Samumed, Siemens Healthineers, Pinteon Therapeutics,  
47  
48 470 Nervgen, AZTherapies, CogRx and Red Abbey Labs, has given lectures in symposia sponsored by  
49  
50 471 Celectricon, Fujirebio, Alzecure and Biogen, and is a co-founder of Brain Biomarker Solutions in  
51  
52 472 Gothenburg AB (BBS), which is a part of the GU Ventures Incubator Program (outside submitted  
53  
54 473 work).  
55  
56  
57  
58  
59  
60

1  
2  
3 474 AJCS is advisor for Prolira, a start-up company that develops an EEG-based delirium monitor. Any  
4  
5 475 (future) profits from EEG-based delirium monitoring will be used for future scientific research only.  
6  
7

8 476 GS has participated in one advisory meeting for Biogen. HMN has received lecture fees from Vifor  
9  
10 477 Pharma and Orion Pharma.  
11  
12

13  
14 478 The other authors declare that they have no competing interests.  
15

16  
17 479 **Consent for publication:** Not required  
18

19  
20 480 **Funding:** The trial is funded by KLINBEFORSK, The National Programme for Clinical Therapy Research  
21  
22 481 in the Specialist Health Service in Norway, grant number 2020204. HZ is a Wallenberg Scholar.  
23  
24

25 482 **Disclaimer:** Funders have no role in the trial design, data collection, management, analysis, writing of  
26  
27 483 the manuscript or decision to publish.  
28  
29

30 484 **Author contributions:**  
31

32  
33 485 Drafting of the manuscript: BEN  
34  
35

36 486 Critical revision of the manuscript for important intellectual content: BEN, RB, RH, JLH, AKK, SAL, IM,  
37  
38

39 487 HMN, JR, GS, ES, NKS, ES, AS, ØSS, TT, AW, HZ, TBW  
40  
41

42 488 Obtained funding: TBW  
43  
44

45 489 All authors contributed to the writing of the manuscript and approved the final version.  
46  
47

48 490 **Acknowledgements:** The trial is investigator-initiated and investigator-led, and is conducted  
49  
50 491 independently of the pharmaceutical industry. We are thankful to the staff of the participating  
51  
52 492 departments for their compliance with the project directives and their caring for the patients.  
53  
54

55 493  
56  
57

58 494 **Abbreviations:**  
59  
60

| Abbreviation          | Explanation                                                                                                                                     |
|-----------------------|-------------------------------------------------------------------------------------------------------------------------------------------------|
| AE                    | Adverse Event                                                                                                                                   |
| ALPHA2PREVENT         | Alpha-2-adrenergic receptor agonists for the prevention of delirium and cognitive decline after open heart surgery: randomised controlled trial |
| ASA<br>classification | American Society of Anesthesiologists Physical Status Classification                                                                            |
| CABG                  | Coronary Artery Bypass Grafting                                                                                                                 |
| CAM-ICU               | Confusion Assessment Method for Intensive Care Units                                                                                            |
| CPB                   | Cardiopulmonary Bypass                                                                                                                          |
| CRF                   | Case Report Form                                                                                                                                |
| DSM-5                 | Diagnostic and Statistical Manual of Mental Disorders, 5th edition                                                                              |
| ECG                   | Electrocardiogram                                                                                                                               |
| EQ-5D-5L              | EuroQol 5 Dimension 5 Level                                                                                                                     |
| FI                    | Frailty Index                                                                                                                                   |
| GFR                   | Glomerular Filtration Rate                                                                                                                      |
| ICU                   | Intensive Care Unit                                                                                                                             |
| MAP                   | Mean Arterial Pressure                                                                                                                          |
| MoCA                  | Montreal Cognitive Assessment                                                                                                                   |
| NFL                   | Neurofilament light                                                                                                                             |
| OSLA                  | Observational Scale of Level of Arousal                                                                                                         |
| ProBNP                | Pro B-type Natriuretic Peptide                                                                                                                  |
| PROM                  | Patient Rated Outcome Measure                                                                                                                   |
| RASS                  | Richmond Agitation Sedation Scale                                                                                                               |
| RCT                   | Randomised Controlled Trial                                                                                                                     |
| SAE                   | Serious Adverse Event                                                                                                                           |

1  
2  
3  
4  
5  
6  
7  
8  
9  
10  
11  
12  
13  
14  
15  
16  
17  
18  
19  
20  
21  
22  
23  
24  
25  
26  
27  
28  
29  
30  
31  
32  
33  
34  
35  
36  
37  
38  
39  
40  
41  
42  
43  
44  
45  
46  
47  
48  
49  
50  
51  
52  
53  
54  
55  
56  
57  
58  
59  
60

|     |                   |
|-----|-------------------|
| TMT | Trail Making Test |
|-----|-------------------|

495

496

For peer review only

1  
2  
3 497 **LEGENDS**  
4  
5

6 498 **Figure 1:**  
7  
8

9 499 Study schema. MoCA, Montreal Cognitive Assessment; TMT, Trail Making Test; EQ-5D-5L, EuroQol 5

10  
11 500 Dimension 5 Level; POD, Postoperative Day  
12  
13

14  
15 501  
16  
17  
18  
19  
20  
21  
22  
23  
24  
25  
26  
27  
28  
29  
30  
31  
32  
33  
34  
35  
36  
37  
38  
39  
40  
41  
42  
43  
44  
45  
46  
47  
48  
49  
50  
51  
52  
53  
54  
55  
56  
57  
58  
59  
60

For peer review only



502 **REFERENCES**

- 503 1. Marcantonio ER. Delirium in Hospitalized Older Adults. *The New England journal of medicine*  
504 2017;377(15):1456-66. doi: 10.1056/NEJMcp1605501 [published Online First: 2017/10/12]
- 505 2. Wilson JE, Mart MF, Cunningham C, et al. Delirium. *Nat Rev Dis Primers* 2020;6(1):90. doi:  
506 10.1038/s41572-020-00223-4
- 507 3. Greaves D, Psaltis PJ, Ross TJ, et al. Cognitive outcomes following coronary artery bypass grafting:  
508 A systematic review and meta-analysis of 91,829 patients. *International journal of cardiology*  
509 2019;289:43-49. doi: 10.1016/j.ijcard.2019.04.065 [published Online First: 2019/05/13]
- 510 4. Eide LS, Ranhoff AH, Fridlund B, et al. Comparison of frequency, risk factors, and time course of  
511 postoperative delirium in octogenarians after transcatheter aortic valve implantation versus  
512 surgical aortic valve replacement. *The American journal of cardiology* 2015;115(6):802-9. doi:  
513 10.1016/j.amjcard.2014.12.043 [published Online First: 2015/02/04]
- 514 5. Hollinger A, Siegemund M, Goettel N, et al. Postoperative Delirium in Cardiac Surgery: An  
515 Unavoidable Menace? *Journal of cardiothoracic and vascular anesthesia* 2015;29(6):1677-87.  
516 doi: 10.1053/j.jvca.2014.08.021 [published Online First: 2015/10/13]
- 517 6. Abrahamov D, Levran O, Naparstek S, et al. Blood-Brain Barrier Disruption After Cardiopulmonary  
518 Bypass: Diagnosis and Correlation to Cognition. *The Annals of thoracic surgery*  
519 2017;104(1):161-69. doi: 10.1016/j.athoracsur.2016.10.043
- 520 7. Gleason LJ, Schmitt EM, Kosar CM, et al. Effect of Delirium and Other Major Complications on  
521 Outcomes After Elective Surgery in Older Adults. *JAMA Surg* 2015;150(12):1134-40. doi:  
522 10.1001/jamasurg.2015.2606
- 523 8. Witlox J, Eurelings LS, de Jonghe JF, et al. Delirium in elderly patients and the risk of postdischarge  
524 mortality, institutionalization, and dementia: a meta-analysis. *JAMA* 2010;304(4):443-51. doi:  
525 304/4/443 [pii];10.1001/jama.2010.1013 [doi]
- 526 9. Krogseth M, Wyller TB, Engedal K, et al. Delirium is a risk factor for institutionalization and  
527 functional decline in older hip fracture patients. *Journal of psychosomatic research*

- 1  
2  
3 528 2014;76(1):68-74. doi: 10.1016/j.jpsychores.2013.10.006 [published Online First:  
4  
5 529 2013/12/24]  
6  
7 530 10. Pezzullo L, Streatfeild J, Hickson J, et al. Economic impact of delirium in Australia: a cost of illness  
8  
9 531 study. *BMJ Open* 2019;9(9):e027514. doi: 10.1136/bmjopen-2018-027514 [published Online  
10  
11 532 First: 2019/09/19]  
12  
13  
14 533 11. Instenes I, Gjengedal E, Eide LSP, et al. "Eight Days of Nightmares ... " - Octogenarian Patients'  
15  
16 534 Experiences of Postoperative Delirium after Transcatheter or Surgical Aortic Valve  
17  
18 535 Replacement. *Heart, lung & circulation* 2018;27(2):260-66. doi: 10.1016/j.hlc.2017.02.012  
19  
20 536 [published Online First: 2017/04/12]  
21  
22  
23 537 12. Gottesman RF, Grega MA, Bailey MM, et al. Delirium after coronary artery bypass graft surgery  
24  
25 538 and late mortality. *Annals of neurology* 2010;67(3):338-44. doi: 10.1002/ana.21899  
26  
27 539 [published Online First: 2010/04/08]  
28  
29  
30 540 13. Davis DH, Muniz-Terrera G, Keage HA, et al. Association of Delirium With Cognitive Decline in Late  
31  
32 541 Life: A Neuropathologic Study of 3 Population-Based Cohort Studies. *JAMA Psychiatry* 2017  
33  
34 542 doi: 10.1001/jamapsychiatry.2016.3423 [published Online First: 2017/01/24]  
35  
36  
37 543 14. Saczynski JS, Marcantonio ER, Quach L, et al. Cognitive trajectories after postoperative delirium.  
38  
39 544 *The New England journal of medicine* 2012;367(1):30-9. doi: 10.1056/NEJMoa1112923  
40  
41 545 [published Online First: 2012/07/06]  
42  
43  
44 546 15. Persico I, Cesari M, Morandi A, et al. Frailty and Delirium in Older Adults: A Systematic Review  
45  
46 547 and Meta-Analysis of the Literature. *Journal of the American Geriatrics Society*  
47  
48 548 2018;66(10):2022-30. doi: 10.1111/jgs.15503 [published Online First: 2018/09/22]  
49  
50 549 16. van Beek-Peeters J, van Noort EHM, Faes MC, et al. Shared decision making in older patients with  
51  
52 550 symptomatic severe aortic stenosis: a systematic review. *Heart* 2020;106(9):647-55. doi:  
53  
54 551 10.1136/heartjnl-2019-316055 [published Online First: 2020/02/01]  
55  
56  
57 552 17. Clegg A, Young J, Iliffe S, et al. Frailty in elderly people. *Lancet* 2013;381(9868):752-62. doi:  
58  
59 553 S0140-6736(12)62167-9 [pii];10.1016/S0140-6736(12)62167-9 [doi]  
60

- 1  
2  
3 554 18. Guidet B, de Lange DW, Boumendil A, et al. The contribution of frailty, cognition, activity of daily  
4  
5 555 life and comorbidities on outcome in acutely admitted patients over 80 years in European  
6  
7 556 ICUs: the VIP2 study. *Intensive care medicine* 2020;46(1):57-69. doi: 10.1007/s00134-019-  
8  
9 557 05853-1  
10  
11  
12 558 19. Meagher DJ, Leonard M, Donnelly S, et al. A longitudinal study of motor subtypes in delirium:  
13  
14 559 frequency and stability during episodes. *JPsychosomRes* 2012;72(3):236-41. doi: S0022-  
15  
16 560 3999(11)00298-4 [pii];10.1016/j.jpsychores.2011.11.013 [doi]  
17  
18  
19 561 20. Godfrey A, Leonard M, Donnelly S, et al. Validating a new clinical subtyping scheme for delirium  
20  
21 562 with electronic motion analysis. *Psychiatry research* 2010;178(1):186-90. doi:  
22  
23 563 10.1016/j.psychres.2009.04.010 [published Online First: 2010/05/11]  
24  
25  
26 564 21. Evensen S, Bourke AK, Lydersen S, et al. Motor activity across delirium motor subtypes in geriatric  
27  
28 565 patients assessed using body-worn sensors: a Norwegian cross-sectional study. *BMJ Open*  
29  
30 566 2019;9(2):e026401. doi: 10.1136/bmjopen-2018-026401 [published Online First:  
31  
32 567 2019/03/04]  
33  
34  
35 568 22. Harbo EF, Fuglerud SS, Skjaervold NK. Visualisation of limb movements by accelerometers in  
36  
37 569 sedated patients. *Crit Care* 2020;24(1):283. doi: 10.1186/s13054-020-02975-7 [published  
38  
39 570 Online First: 2020/06/05]  
40  
41  
42 571 23. Needham MJ, Webb CE, Bryden DC. Postoperative cognitive dysfunction and dementia: what we  
43  
44 572 need to know and do. *British journal of anaesthesia* 2017;119(suppl\_1):i115-i25. doi:  
45  
46 573 10.1093/bja/aex354 [published Online First: 2017/11/22]  
47  
48  
49 574 24. Siddiqi N, Harrison JK, Clegg A, et al. Interventions for preventing delirium in hospitalised non-ICU  
50  
51 575 patients. *The Cochrane database of systematic reviews* 2016;3:CD005563. doi:  
52  
53 576 10.1002/14651858.CD005563.pub3 [published Online First: 2016/03/12]  
54  
55  
56 577 25. Flukiger J, Hollinger A, Speich B, et al. Dexmedetomidine in prevention and treatment of  
57  
58 578 postoperative and intensive care unit delirium: a systematic review and meta-analysis.  
59  
60

- 1  
2  
3 579 *Annals of intensive care* 2018;8(1):92. doi: 10.1186/s13613-018-0437-z [published Online  
4  
5 580 First: 2018/09/22]  
6  
7 581 26. Bajwa S, Kulshrestha A. Dexmedetomidine: An Adjuvant Making Large Inroads into Clinical  
8  
9 582 Practice. *Annals of medical and health sciences research* 2013;3(4):475-83. doi:  
10 583 10.4103/2141-9248.122044 [published Online First: 2014/01/01]  
11  
12 584 27. Li P, Li LX, Zhao ZZ, et al. Dexmedetomidine reduces the incidence of postoperative delirium after  
13  
14 585 cardiac surgery: a meta-analysis of randomized controlled trials. *BMC anesthesiology*  
15  
16 586 2021;21(1):153. doi: 10.1186/s12871-021-01370-1 [published Online First: 2021/05/20]  
17  
18 587 28. Li CJ, Wang BJ, Mu DL, et al. Randomized clinical trial of intraoperative dexmedetomidine to  
19  
20 588 prevent delirium in the elderly undergoing major non-cardiac surgery. *The British journal of*  
21  
22 589 *surgery* 2020;107(2):e123-e32. doi: 10.1002/bjs.11354 [published Online First: 2020/01/07]  
23  
24 590 29. Likhvantsev VV, Landoni G, Grebenchikov OA, et al. Perioperative Dexmedetomidine Supplement  
25  
26 591 Decreases Delirium Incidence After Adult Cardiac Surgery: A Randomized, Double-Blind,  
27  
28 592 Controlled Study. *Journal of cardiothoracic and vascular anesthesia* 2020 doi:  
29  
30 593 10.1053/j.jvca.2020.02.035 [published Online First: 2020/04/09]  
31  
32 594 30. van Norden J, Spies CD, Borchers F, et al. The effect of peri-operative dexmedetomidine on the  
33  
34 595 incidence of postoperative delirium in cardiac and non-cardiac surgical patients: a  
35  
36 596 randomised, double-blind placebo-controlled trial. *Anaesthesia* 2021 doi:  
37  
38 597 10.1111/anae.15469 [published Online First: 2021/05/08]  
39  
40 598 31. Peng K, Shen YP, Ying YY, et al. Perioperative dexmedetomidine and 5-year survival in patients  
41  
42 599 undergoing cardiac surgery. *British journal of anaesthesia* 2021 doi:  
43  
44 600 10.1016/j.bja.2021.03.040 [published Online First: 2021/06/05]  
45  
46 601 32. Subramaniam B, Shankar P, Shaefi S, et al. Effect of Intravenous Acetaminophen vs Placebo  
47  
48 602 Combined With Propofol or Dexmedetomidine on Postoperative Delirium Among Older  
49  
50 603 Patients Following Cardiac Surgery: The DEXACET Randomized Clinical Trial. *JAMA*  
51  
52 604 2019;321(7):686-96. doi: 10.1001/jama.2019.0234 [published Online First: 2019/02/20]  
53  
54  
55  
56  
57  
58  
59  
60

- 1  
2  
3 605 33. Turan A, Duncan A, Leung S, et al. Dexmedetomidine for reduction of atrial fibrillation and  
4  
5 606 delirium after cardiac surgery (DECADE): a randomised placebo-controlled trial. *Lancet*  
6  
7 607 2020;396(10245):177-85. doi: 10.1016/S0140-6736(20)30631-0 [published Online First:  
8  
9 608 2020/07/20]
- 11  
12 609 34. Deiner S, Luo X, Lin HM, et al. Intraoperative Infusion of Dexmedetomidine for Prevention of  
13  
14 610 Postoperative Delirium and Cognitive Dysfunction in Elderly Patients Undergoing Major  
15  
16 611 Elective Noncardiac Surgery: A Randomized Clinical Trial. *JAMA Surg* 2017;152(8):e171505.  
17  
18 612 doi: 10.1001/jamasurg.2017.1505 [published Online First: 2017/06/09]
- 20  
21 613 35. Cheng XQ, Mei B, Zuo YM, et al. A multicentre randomised controlled trial of the effect of intra-  
22  
23 614 operative dexmedetomidine on cognitive decline after surgery. *Anaesthesia* 2019;74(6):741-  
24  
25 615 50. doi: 10.1111/anae.14606 [published Online First: 2019/03/06]
- 27  
28 616 36. Pichot C, Ghignone M, Quintin L. Dexmedetomidine and clonidine: from second- to first-line  
29  
30 617 sedative agents in the critical care setting? *Journal of intensive care medicine* 2012;27(4):219-  
31  
32 618 37. doi: 10.1177/0885066610396815 [published Online First: 2011/04/29]
- 34  
35 619 37. Khan ZP, Ferguson CN, Jones RM. alpha-2 and imidazoline receptor agonists. Their pharmacology  
36  
37 620 and therapeutic role. *Anaesthesia* 1999;54(2):146-65.
- 38  
39 621 38. Wang JG, Belley-Cote E, Burry L, et al. Clonidine for sedation in the critically ill: a systematic  
40  
41 622 review and meta-analysis. *Crit Care* 2017;21(1):75. doi: 10.1186/s13054-017-1610-8  
42  
43 623 [published Online First: 2017/03/24]
- 45  
46 624 39. Rubino AS, Onorati F, Caroleo S, et al. Impact of clonidine administration on delirium and related  
47  
48 625 respiratory weaning after surgical correction of acute type-A aortic dissection: results of a  
49  
50 626 pilot study. *InteractCardiovascThoracSurg* 2010;10(1):58-62. doi: icvts.2009.217562  
51  
52 627 [pii];10.1510/icvts.2009.217562 [doi]
- 54  
55 628 40. Shokri H, Ali I. A randomized control trial comparing prophylactic dexmedetomidine versus  
56  
57 629 clonidine on rates and duration of delirium in older adult patients undergoing coronary  
58  
59  
60

- 1  
2  
3 630 artery bypass grafting. *Journal of clinical anesthesia* 2020;61:109622. doi:  
4  
5 631 10.1016/j.jclinane.2019.09.016 [published Online First: 2019/11/02]  
6  
7 632 41. American Psychiatric Association. Diagnostic and Statistical Manual of Mental Disorders: DSM-5  
8  
9 633 (5th ed.). Washington DC: American Psychiatric Association 2013.  
10  
11  
12 634 42. Cole MG, Ciampi A, Belzile E, et al. Subsyndromal delirium in older people: a systematic review of  
13  
14 635 frequency, risk factors, course and outcomes. *Int J Geriatr Psychiatry* 2013;28(8):771-80. doi:  
15  
16 636 10.1002/gps.3891  
17  
18 637 43. Collet JP, Thiele H, Barbato E, et al. 2020 ESC Guidelines for the management of acute coronary  
19  
20 638 syndromes in patients presenting without persistent ST-segment elevation. *European heart*  
21  
22 639 *journal* 2021;42(14):1289-367. doi: 10.1093/eurheartj/ehaa575 [published Online First:  
23  
24 640 2020/08/30]  
25  
26  
27 641 44. EuroQol G. EuroQol--a new facility for the measurement of health-related quality of life. *Health*  
28  
29 642 *policy (Amsterdam, Netherlands)* 1990;16(3):199-208. doi: 10.1016/0168-8510(90)90421-9  
30  
31 643 [published Online First: 1990/11/05]  
32  
33  
34 644 45. Neerland BE, Hov KR, Bruun Wyller V, et al. The protocol of the Oslo Study of Clonidine in Elderly  
35  
36 645 Patients with Delirium; LUCID: a randomised placebo-controlled trial. *BMC geriatrics*  
37  
38 646 2015;15(1):7. doi: 10.1186/s12877-015-0006-3 [published Online First: 2015/04/19]  
39  
40  
41 647 46. Oh ES, Akeju O, Avidan MS, et al. A roadmap to advance delirium research: Recommendations  
42  
43 648 from the NIDUS Scientific Think Tank. *Alzheimer's & dementia : the journal of the Alzheimer's*  
44  
45 649 *Association* 2020;16(5):726-33. doi: 10.1002/alz.12076 [published Online First: 2020/04/16]  
46  
47  
48 650 47. Sessler CN, Gosnell MS, Grap MJ, et al. The Richmond Agitation-Sedation Scale: validity and  
49  
50 651 reliability in adult intensive care unit patients. *Am J Respir Crit Care Med* 2002;166(10):1338-  
51  
52 652 44. doi: 10.1164/rccm.2107138 [doi];166/10/1338 [pii]  
53  
54  
55 653 48. Tiegues Z, McGrath A, Hall RJ, et al. Abnormal level of arousal as a predictor of delirium and  
56  
57 654 inattention: an exploratory study. *The American journal of geriatric psychiatry : official*  
58  
59  
60

- 1  
2  
3 655 *journal of the American Association for Geriatric Psychiatry* 2013;21(12):1244-53. doi:  
4  
5 656 10.1016/j.jagp.2013.05.003  
6  
7 657 49. Hall RJ, Meagher DJ, Maclulich AM. Delirium detection and monitoring outside the ICU.  
8  
9 658 *BestPractResClinAnaesthesiol* 2012;26(3):367-83. doi: S1521-6896(12)00035-3  
10  
11 [pii];10.1016/j.bpa.2012.07.002 [doi]  
12  
13  
14 660 50. Ely EW, Inouye SK, Bernard GR, et al. Delirium in mechanically ventilated patients: validity and  
15  
16 661 reliability of the confusion assessment method for the intensive care unit (CAM-ICU). *JAMA*  
17  
18 662 2001;286(21):2703-10. doi: 10.1001/jama.286.21.2703 [published Online First: 2001/12/26]  
19  
20  
21 663 51. Khan BA, Perkins AJ, Gao S, et al. The Confusion Assessment Method for the ICU-7 Delirium  
22  
23 664 Severity Scale: A Novel Delirium Severity Instrument for Use in the ICU. *Crit Care Med*  
24  
25 665 2017;45(5):851-57. doi: 10.1097/CCM.0000000000002368  
26  
27  
28 666 52. Nasreddine ZS, Phillips NA, Bedirian V, et al. The Montreal Cognitive Assessment, MoCA: a brief  
29  
30 667 screening tool for mild cognitive impairment. *Journal of the American Geriatrics Society*  
31  
32 668 2005;53(4):695-9. doi: 10.1111/j.1532-5415.2005.53221.x [published Online First:  
33  
34 669 2005/04/09]  
35  
36  
37 670 53. Morris JC, Heyman A, Mohs RC, et al. The Consortium to Establish a Registry for Alzheimer's  
38  
39 671 Disease (CERAD). Part I. Clinical and neuropsychological assessment of Alzheimer's disease.  
40  
41 672 *Neurology* 1989;39(9):1159-65. [published Online First: 1989/09/01]  
42  
43  
44 673 54. Tombaugh TN. Trail Making Test A and B: normative data stratified by age and education.  
45  
46 674 *Archives of clinical neuropsychology : the official journal of the National Academy of*  
47  
48 675 *Neuropsychologists* 2004;19(2):203-14. doi: 10.1016/S0887-6177(03)00039-8 [published  
49  
50 676 Online First: 2004/03/11]  
51  
52  
53 677 55. Tombaugh TN, Kozak J, Rees L. Normative data stratified by age and education for two measures  
54  
55 678 of verbal fluency: FAS and animal naming. *Archives of clinical neuropsychology : the official*  
56  
57 679 *journal of the National Academy of Neuropsychologists* 1999;14(2):167-77. [published Online  
58  
59 680 First: 2003/11/01]  
60



- 1  
2  
3 681 56. Wechsler D NH, Nordvik H. Wais-III Wechsler Adult Intelligence Scale : manual. 3. Ed. Stockholm:  
4  
5 682 Psykologiförlaget 2003.  
6  
7 683 57. Kim DH, Afilalo J, Shi SM, et al. Evaluation of Changes in Functional Status in the Year After Aortic  
8  
9 684 Valve Replacement. *JAMA Intern Med* 2019;179(3):383-91. doi:  
10 685 10.1001/jamainternmed.2018.6738 [published Online First: 2019/02/05]  
11  
12 686 58. Afilalo J, Lauck S, Kim DH, et al. Frailty in Older Adults Undergoing Aortic Valve Replacement: The  
13  
14 687 FRAILITY-AVR Study. *J Am Coll Cardiol* 2017;70(6):689-700. doi: 10.1016/j.jacc.2017.06.024  
15  
16 688 [published Online First: 2017/07/12]  
17  
18 689 59. Halaas NB, Blennow K, Idland AV, et al. Neurofilament Light in Serum and Cerebrospinal Fluid of  
19  
20 690 Hip Fracture Patients with Delirium. *Dementia and geriatric cognitive disorders* 2018;46(5-  
21  
22 691 6):346-57. doi: 10.1159/000494754 [published Online First: 2018/12/07]  
23  
24 692 60. Karikari TK, Pascoal TA, Ashton NJ, et al. Blood phosphorylated tau 181 as a biomarker for  
25  
26 693 Alzheimer's disease: a diagnostic performance and prediction modelling study using data  
27  
28 694 from four prospective cohorts. *The Lancet Neurology* 2020;19(5):422-33. doi: 10.1016/S1474-  
29  
30 695 4422(20)30071-5 [published Online First: 2020/04/26]  
31  
32 696 61. Ballweg T, White M, Parker M, et al. Association between plasma tau and postoperative delirium  
33  
34 697 incidence and severity: a prospective observational study. *British journal of anaesthesia*  
35  
36 698 2021;126(2):458-66. doi: 10.1016/j.bja.2020.08.061 [published Online First: 2020/11/25]  
37  
38 699 62. Yu L, Wen G, Zhu S, et al. Abnormal phosphorylation of tau protein and neuroinflammation  
39  
40 700 induced by laparotomy in an animal model of postoperative delirium. *Experimental brain*  
41  
42 701 *research* 2021 doi: 10.1007/s00221-020-06007-2 [published Online First: 2021/01/08]  
43  
44 702 63. Sajjad MU, Blennow K, Knapskog AB, et al. Cerebrospinal Fluid Levels of Interleukin-8 in Delirium,  
45  
46 703 Dementia, and Cognitively Healthy Patients. *Journal of Alzheimer's disease : JAD*  
47  
48 704 2020;73(4):1363-72. doi: 10.3233/JAD-190941 [published Online First: 2020/01/14]  
49  
50  
51  
52  
53  
54  
55  
56  
57  
58  
59  
60



- 1  
2  
3 705 64. Hov KR, Bolstad N, Idland AV, et al. Cerebrospinal Fluid S100B and Alzheimer's Disease  
4  
5 706 Biomarkers in Hip Fracture Patients with Delirium. *Dementia and geriatric cognitive disorders*  
6  
7 707 *extra* 2017;7(3):374-85. doi: 10.1159/000481853 [published Online First: 2017/12/29]  
8  
9  
10 708 65. Neerland BE, Hall RJ, Seljeflot I, et al. Associations Between Delirium and Preoperative  
11  
12 709 Cerebrospinal Fluid C-Reactive Protein, Interleukin-6, and Interleukin-6 Receptor in  
13  
14 710 Individuals with Acute Hip Fracture. *Journal of the American Geriatrics Society*  
15  
16 711 2016;64(7):1456-63. doi: 10.1111/jgs.14238 [published Online First: 2016/06/25]  
17  
18  
19 712 66. Balaganapathy P, Baik SH, Mallilankaraman K, et al. Interplay between Notch and p53 promotes  
20  
21 713 neuronal cell death in ischemic stroke. *Journal of cerebral blood flow and metabolism :*  
22  
23 714 *official journal of the International Society of Cerebral Blood Flow and Metabolism*  
24  
25 715 2018;38(10):1781-95. doi: 10.1177/0271678X17715956  
26  
27  
28 716 67. Wedervang-Resell K, Ueland T, Aukrust P, et al. Reduced levels of circulating adhesion molecules  
29  
30 717 in adolescents with early-onset psychosis. *NPJ Schizophr* 2020;6(1):20. doi: 10.1038/s41537-  
31  
32 718 020-00112-5  
33  
34  
35 719 68. Fleming TR, DeMets DL, Roe MT, et al. Data monitoring committees: Promoting best practices to  
36  
37 720 address emerging challenges. *Clin Trials* 2017;14(2):115-23. doi: 10.1177/1740774516688915  
38  
39 721 69. Wang YY, Yue JR, Xie DM, et al. Effect of the Tailored, Family-Involved Hospital Elder Life Program  
40  
41 722 on Postoperative Delirium and Function in Older Adults A Randomized Clinical Trial. *Jama*  
42  
43 723 *Internal Medicine* 2020;180(1):17-25. doi: 10.1001/jamainternmed.2019.4446  
44  
45  
46 724 70. Su X, Meng ZT, Wu XH, et al. Dexmedetomidine for prevention of delirium in elderly patients after  
47  
48 725 non-cardiac surgery: a randomised, double-blind, placebo-controlled trial. *Lancet* 2016 doi:  
49  
50 726 10.1016/S0140-6736(16)30580-3  
51  
52  
53 727 71. Shehabi Y, Grant P, Wolfenden H, et al. Prevalence of delirium with dexmedetomidine compared  
54  
55 728 with morphine based therapy after cardiac surgery: a randomized controlled trial  
56  
57 729 (DEXmedetomidine COmpared to Morphine-DEXCOM Study). *Anesthesiology*  
58  
59 730 2009;111(5):1075-84. doi: 10.1097/ALN.0b013e3181b6a783 [doi]  
60

- 1  
2  
3 731 72. Jamadarkhana S, Gopal S. Clonidine in adults as a sedative agent in the intensive care unit.  
4  
5 732 *Journal of anaesthesiology, clinical pharmacology* 2010;26(4):439-45. [published Online First:  
6  
7 733 2011/05/07]  
8  
9  
10 734 73. Wang N, Wang Z, Song X, et al. Intravenous dexmedetomidine versus intravenous clonidine for  
11  
12 735 post spinal anesthesia shivering: a meta-analysis of randomized controlled trials. *Scottish*  
13  
14 736 *medical journal* 2020;65(3):94-102. doi: 10.1177/0036933020936283 [published Online First:  
15  
16 737 2020/06/24]  
17  
18  
19  
20  
21  
22  
23  
24  
25  
26  
27  
28  
29  
30  
31  
32  
33  
34  
35  
36  
37  
38  
39  
40  
41  
42  
43  
44  
45  
46  
47  
48  
49  
50  
51  
52  
53  
54  
55  
56  
57  
58  
59  
60

For peer review only

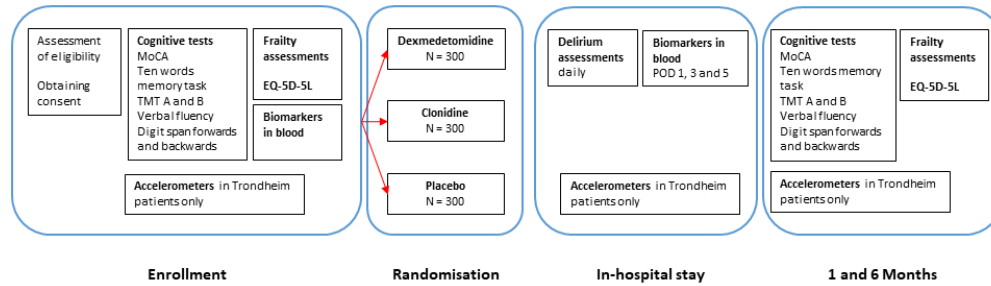

Figure 1:  
Study schema. MoCA, Montreal Cognitive Assessment; TMT, Trail Making Test; EQ-5D-5L, EuroQol 5 Dimension 5 Level; POD, Postoperative Day

254x190mm (96 x 96 DPI)

# Reporting checklist for protocol of a clinical trial.

Based on the SPIRIT guidelines.

## Instructions to authors

Complete this checklist by entering the page numbers from your manuscript where readers will find each of the items listed below.

Your article may not currently address all the items on the checklist. Please modify your text to include the missing information. If you are certain that an item does not apply, please write "n/a" and provide a short explanation.

Upload your completed checklist as an extra file when you submit to a journal.

In your methods section, say that you used the SPIRIT reporting guidelines, and cite them as:

Chan A-W, Tetzlaff JM, Gøtzsche PC, Altman DG, Mann H, Berlin J, Dickersin K, Hróbjartsson A, Schulz KF, Parulekar WR, Krleža-Jerić K, Laupacis A, Moher D. SPIRIT 2013 Explanation and Elaboration: Guidance for protocols of clinical trials. *BMJ*. 2013;346:e7586

|                                   |                     |                                                                                                              | Page<br>Number |
|-----------------------------------|---------------------|--------------------------------------------------------------------------------------------------------------|----------------|
| <b>Administrative information</b> |                     |                                                                                                              |                |
| Title                             | <a href="#">#1</a>  | Descriptive title identifying the study design, population, interventions, and, if applicable, trial acronym | 1              |
| Trial registration                | <a href="#">#2a</a> | Trial identifier and registry name. If not yet registered, name of intended registry                         | 6              |
| Trial registration: data set      | <a href="#">#2b</a> | All items from the World Health Organization Trial Registration Data Set                                     | 11             |
| Protocol version                  | <a href="#">#3</a>  | Date and version identifier                                                                                  | NA             |

|    |                      |                     |                                                                               |            |
|----|----------------------|---------------------|-------------------------------------------------------------------------------|------------|
| 1  | Funding              | <a href="#">#4</a>  | Sources and types of financial, material, and other support                   | 26         |
| 2  |                      |                     |                                                                               |            |
| 3  |                      |                     |                                                                               |            |
| 4  | Roles and            | <a href="#">#5a</a> | Names, affiliations, and roles of protocol contributors                       | 1-3,26     |
| 5  | responsibilities:    |                     |                                                                               |            |
| 6  | contributorship      |                     |                                                                               |            |
| 7  |                      |                     |                                                                               |            |
| 8  |                      |                     |                                                                               |            |
| 9  |                      |                     |                                                                               |            |
| 10 | Roles and            | <a href="#">#5b</a> | Name and contact information for the trial sponsor                            | 25-26      |
| 11 | responsibilities:    |                     |                                                                               |            |
| 12 | sponsor contact      |                     |                                                                               |            |
| 13 | information          |                     |                                                                               |            |
| 14 |                      |                     |                                                                               |            |
| 15 |                      |                     |                                                                               |            |
| 16 |                      |                     |                                                                               |            |
| 17 |                      |                     |                                                                               |            |
| 18 | Roles and            | <a href="#">#5c</a> | Role of study sponsor and funders, if any, in study design; collection,       | 26         |
| 19 | responsibilities:    |                     | management, analysis, and interpretation of data; writing of the report;      |            |
| 20 | sponsor and funder   |                     | and the decision to submit the report for publication, including whether      |            |
| 21 |                      |                     | they will have ultimate authority over any of these activities                |            |
| 22 |                      |                     |                                                                               |            |
| 23 |                      |                     |                                                                               |            |
| 24 |                      |                     |                                                                               |            |
| 25 |                      |                     |                                                                               |            |
| 26 |                      |                     |                                                                               |            |
| 27 | Roles and            | <a href="#">#5d</a> | Composition, roles, and responsibilities of the coordinating centre,          | 19-21      |
| 28 | responsibilities:    |                     | steering committee, endpoint adjudication committee, data management          |            |
| 29 | committees           |                     | team, and other individuals or groups overseeing the trial, if applicable     |            |
| 30 |                      |                     | (see Item 21a for data monitoring committee)                                  |            |
| 31 |                      |                     |                                                                               |            |
| 32 |                      |                     |                                                                               |            |
| 33 |                      |                     |                                                                               |            |
| 34 |                      |                     |                                                                               |            |
| 35 | <b>Introduction</b>  |                     |                                                                               |            |
| 36 |                      |                     |                                                                               |            |
| 37 |                      |                     |                                                                               |            |
| 38 | Background and       | <a href="#">#6a</a> | Description of research question and justification for undertaking the trial, | 8-10,16,23 |
| 39 | rationale            |                     | including summary of relevant studies (published and unpublished)             |            |
| 40 |                      |                     | examining benefits and harms for each intervention                            |            |
| 41 |                      |                     |                                                                               |            |
| 42 |                      |                     |                                                                               |            |
| 43 |                      |                     |                                                                               |            |
| 44 |                      |                     |                                                                               |            |
| 45 | Background and       | <a href="#">#6b</a> | Explanation for choice of comparators                                         | 11         |
| 46 | rationale: choice of |                     |                                                                               |            |
| 47 | comparators          |                     |                                                                               |            |
| 48 |                      |                     |                                                                               |            |
| 49 |                      |                     |                                                                               |            |
| 50 |                      |                     |                                                                               |            |
| 51 | Objectives           | <a href="#">#7</a>  | Specific objectives or hypotheses                                             | 10         |
| 52 |                      |                     |                                                                               |            |
| 53 |                      |                     |                                                                               |            |
| 54 | Trial design         | <a href="#">#8</a>  | Description of trial design including type of trial (eg, parallel group,      | 11         |
| 55 |                      |                     | crossover, factorial, single group), allocation ratio, and framework (eg,     |            |
| 56 |                      |                     | superiority, equivalence, non-inferiority, exploratory)                       |            |
| 57 |                      |                     |                                                                               |            |
| 58 |                      |                     |                                                                               |            |
| 59 |                      |                     |                                                                               |            |
| 60 |                      |                     |                                                                               |            |

1 **Methods: Participants,**  
 2  
 3 **interventions, and**  
 4  
 5 **outcomes**  
 6

|    |                      |                      |                                                                                                                                                                                                                                                                                                                                                                                |           |
|----|----------------------|----------------------|--------------------------------------------------------------------------------------------------------------------------------------------------------------------------------------------------------------------------------------------------------------------------------------------------------------------------------------------------------------------------------|-----------|
| 7  | Study setting        | <a href="#">#9</a>   | Description of study settings (eg, community clinic, academic hospital) and list of countries where data will be collected. Reference to where list of study sites can be obtained                                                                                                                                                                                             | 11        |
| 8  |                      |                      |                                                                                                                                                                                                                                                                                                                                                                                |           |
| 9  |                      |                      |                                                                                                                                                                                                                                                                                                                                                                                |           |
| 10 |                      |                      |                                                                                                                                                                                                                                                                                                                                                                                |           |
| 11 |                      |                      |                                                                                                                                                                                                                                                                                                                                                                                |           |
| 12 |                      |                      |                                                                                                                                                                                                                                                                                                                                                                                |           |
| 13 |                      |                      |                                                                                                                                                                                                                                                                                                                                                                                |           |
| 14 | Eligibility criteria | <a href="#">#10</a>  | Inclusion and exclusion criteria for participants. If applicable, eligibility criteria for study centres and individuals who will perform the interventions (eg, surgeons, psychotherapists)                                                                                                                                                                                   | 11-13     |
| 15 |                      |                      |                                                                                                                                                                                                                                                                                                                                                                                |           |
| 16 |                      |                      |                                                                                                                                                                                                                                                                                                                                                                                |           |
| 17 |                      |                      |                                                                                                                                                                                                                                                                                                                                                                                |           |
| 18 |                      |                      |                                                                                                                                                                                                                                                                                                                                                                                |           |
| 19 |                      |                      |                                                                                                                                                                                                                                                                                                                                                                                |           |
| 20 | Interventions:       | <a href="#">#11a</a> | Interventions for each group with sufficient detail to allow replication, including how and when they will be administered                                                                                                                                                                                                                                                     | 16        |
| 21 | description          |                      |                                                                                                                                                                                                                                                                                                                                                                                |           |
| 22 |                      |                      |                                                                                                                                                                                                                                                                                                                                                                                |           |
| 23 |                      |                      |                                                                                                                                                                                                                                                                                                                                                                                |           |
| 24 |                      |                      |                                                                                                                                                                                                                                                                                                                                                                                |           |
| 25 | Interventions:       | <a href="#">#11b</a> | Criteria for discontinuing or modifying allocated interventions for a given trial participant (eg, drug dose change in response to harms, participant request, or improving / worsening disease)                                                                                                                                                                               | 16, 20-21 |
| 26 | modifications        |                      |                                                                                                                                                                                                                                                                                                                                                                                |           |
| 27 |                      |                      |                                                                                                                                                                                                                                                                                                                                                                                |           |
| 28 |                      |                      |                                                                                                                                                                                                                                                                                                                                                                                |           |
| 29 |                      |                      |                                                                                                                                                                                                                                                                                                                                                                                |           |
| 30 |                      |                      |                                                                                                                                                                                                                                                                                                                                                                                |           |
| 31 | Interventions:       | <a href="#">#11c</a> | Strategies to improve adherence to intervention protocols, and any procedures for monitoring adherence (eg, drug tablet return; laboratory tests)                                                                                                                                                                                                                              | 21        |
| 32 | adherence            |                      |                                                                                                                                                                                                                                                                                                                                                                                |           |
| 33 |                      |                      |                                                                                                                                                                                                                                                                                                                                                                                |           |
| 34 |                      |                      |                                                                                                                                                                                                                                                                                                                                                                                |           |
| 35 |                      |                      |                                                                                                                                                                                                                                                                                                                                                                                |           |
| 36 |                      |                      |                                                                                                                                                                                                                                                                                                                                                                                |           |
| 37 |                      |                      |                                                                                                                                                                                                                                                                                                                                                                                |           |
| 38 | Interventions:       | <a href="#">#11d</a> | Relevant concomitant care and interventions that are permitted or prohibited during the trial                                                                                                                                                                                                                                                                                  | 16        |
| 39 | concomitant care     |                      |                                                                                                                                                                                                                                                                                                                                                                                |           |
| 40 |                      |                      |                                                                                                                                                                                                                                                                                                                                                                                |           |
| 41 |                      |                      |                                                                                                                                                                                                                                                                                                                                                                                |           |
| 42 |                      |                      |                                                                                                                                                                                                                                                                                                                                                                                |           |
| 43 | Outcomes             | <a href="#">#12</a>  | Primary, secondary, and other outcomes, including the specific measurement variable (eg, systolic blood pressure), analysis metric (eg, change from baseline, final value, time to event), method of aggregation (eg, median, proportion), and time point for each outcome. Explanation of the clinical relevance of chosen efficacy and harm outcomes is strongly recommended | 16-19     |
| 44 |                      |                      |                                                                                                                                                                                                                                                                                                                                                                                |           |
| 45 |                      |                      |                                                                                                                                                                                                                                                                                                                                                                                |           |
| 46 |                      |                      |                                                                                                                                                                                                                                                                                                                                                                                |           |
| 47 |                      |                      |                                                                                                                                                                                                                                                                                                                                                                                |           |
| 48 |                      |                      |                                                                                                                                                                                                                                                                                                                                                                                |           |
| 49 |                      |                      |                                                                                                                                                                                                                                                                                                                                                                                |           |
| 50 |                      |                      |                                                                                                                                                                                                                                                                                                                                                                                |           |
| 51 |                      |                      |                                                                                                                                                                                                                                                                                                                                                                                |           |
| 52 |                      |                      |                                                                                                                                                                                                                                                                                                                                                                                |           |
| 53 |                      |                      |                                                                                                                                                                                                                                                                                                                                                                                |           |
| 54 |                      |                      |                                                                                                                                                                                                                                                                                                                                                                                |           |
| 55 |                      |                      |                                                                                                                                                                                                                                                                                                                                                                                |           |
| 56 |                      |                      |                                                                                                                                                                                                                                                                                                                                                                                |           |
| 57 |                      |                      |                                                                                                                                                                                                                                                                                                                                                                                |           |
| 58 |                      |                      |                                                                                                                                                                                                                                                                                                                                                                                |           |
| 59 |                      |                      |                                                                                                                                                                                                                                                                                                                                                                                |           |
| 60 |                      |                      |                                                                                                                                                                                                                                                                                                                                                                                |           |

|    |                                  |                      |                                                                                                                                                                                                                                                                                                                                                          |                                |
|----|----------------------------------|----------------------|----------------------------------------------------------------------------------------------------------------------------------------------------------------------------------------------------------------------------------------------------------------------------------------------------------------------------------------------------------|--------------------------------|
| 1  | Participant timeline             | <a href="#">#13</a>  | Time schedule of enrolment, interventions (including any run-ins and washouts), assessments, and visits for participants. A schematic diagram is highly recommended (see Figure)                                                                                                                                                                         | 11-16,<br>Table 2,<br>Figure 1 |
| 2  |                                  |                      |                                                                                                                                                                                                                                                                                                                                                          |                                |
| 3  |                                  |                      |                                                                                                                                                                                                                                                                                                                                                          |                                |
| 4  |                                  |                      |                                                                                                                                                                                                                                                                                                                                                          |                                |
| 5  |                                  |                      |                                                                                                                                                                                                                                                                                                                                                          |                                |
| 6  |                                  |                      |                                                                                                                                                                                                                                                                                                                                                          |                                |
| 7  |                                  |                      |                                                                                                                                                                                                                                                                                                                                                          |                                |
| 8  |                                  |                      |                                                                                                                                                                                                                                                                                                                                                          |                                |
| 9  |                                  |                      |                                                                                                                                                                                                                                                                                                                                                          |                                |
| 10 | Sample size                      | <a href="#">#14</a>  | Estimated number of participants needed to achieve study objectives and how it was determined, including clinical and statistical assumptions supporting any sample size calculations                                                                                                                                                                    | 21                             |
| 11 |                                  |                      |                                                                                                                                                                                                                                                                                                                                                          |                                |
| 12 |                                  |                      |                                                                                                                                                                                                                                                                                                                                                          |                                |
| 13 |                                  |                      |                                                                                                                                                                                                                                                                                                                                                          |                                |
| 14 |                                  |                      |                                                                                                                                                                                                                                                                                                                                                          |                                |
| 15 |                                  |                      |                                                                                                                                                                                                                                                                                                                                                          |                                |
| 16 |                                  |                      |                                                                                                                                                                                                                                                                                                                                                          |                                |
| 17 | Recruitment                      | <a href="#">#15</a>  | Strategies for achieving adequate participant enrolment to reach target sample size                                                                                                                                                                                                                                                                      | 11                             |
| 18 |                                  |                      |                                                                                                                                                                                                                                                                                                                                                          |                                |
| 19 |                                  |                      |                                                                                                                                                                                                                                                                                                                                                          |                                |
| 20 |                                  |                      |                                                                                                                                                                                                                                                                                                                                                          |                                |
| 21 | <b>Methods: Assignment</b>       |                      |                                                                                                                                                                                                                                                                                                                                                          |                                |
| 22 | <b>of interventions (for</b>     |                      |                                                                                                                                                                                                                                                                                                                                                          |                                |
| 23 | <b>controlled trials)</b>        |                      |                                                                                                                                                                                                                                                                                                                                                          |                                |
| 24 |                                  |                      |                                                                                                                                                                                                                                                                                                                                                          |                                |
| 25 |                                  |                      |                                                                                                                                                                                                                                                                                                                                                          |                                |
| 26 |                                  |                      |                                                                                                                                                                                                                                                                                                                                                          |                                |
| 27 |                                  |                      |                                                                                                                                                                                                                                                                                                                                                          |                                |
| 28 | Allocation: sequence generation  | <a href="#">#16a</a> | Method of generating the allocation sequence (eg, computer-generated random numbers), and list of any factors for stratification. To reduce predictability of a random sequence, details of any planned restriction (eg, blocking) should be provided in a separate document that is unavailable to those who enrol participants or assign interventions | 13                             |
| 29 |                                  |                      |                                                                                                                                                                                                                                                                                                                                                          |                                |
| 30 |                                  |                      |                                                                                                                                                                                                                                                                                                                                                          |                                |
| 31 |                                  |                      |                                                                                                                                                                                                                                                                                                                                                          |                                |
| 32 |                                  |                      |                                                                                                                                                                                                                                                                                                                                                          |                                |
| 33 |                                  |                      |                                                                                                                                                                                                                                                                                                                                                          |                                |
| 34 |                                  |                      |                                                                                                                                                                                                                                                                                                                                                          |                                |
| 35 |                                  |                      |                                                                                                                                                                                                                                                                                                                                                          |                                |
| 36 |                                  |                      |                                                                                                                                                                                                                                                                                                                                                          |                                |
| 37 |                                  |                      |                                                                                                                                                                                                                                                                                                                                                          |                                |
| 38 | Allocation concealment mechanism | <a href="#">#16b</a> | Mechanism of implementing the allocation sequence (eg, central telephone; sequentially numbered, opaque, sealed envelopes), describing any steps to conceal the sequence until interventions are assigned                                                                                                                                                | 13                             |
| 39 |                                  |                      |                                                                                                                                                                                                                                                                                                                                                          |                                |
| 40 |                                  |                      |                                                                                                                                                                                                                                                                                                                                                          |                                |
| 41 |                                  |                      |                                                                                                                                                                                                                                                                                                                                                          |                                |
| 42 |                                  |                      |                                                                                                                                                                                                                                                                                                                                                          |                                |
| 43 |                                  |                      |                                                                                                                                                                                                                                                                                                                                                          |                                |
| 44 |                                  |                      |                                                                                                                                                                                                                                                                                                                                                          |                                |
| 45 |                                  |                      |                                                                                                                                                                                                                                                                                                                                                          |                                |
| 46 | Allocation: implementation       | <a href="#">#16c</a> | Who will generate the allocation sequence, who will enrol participants, and who will assign participants to interventions                                                                                                                                                                                                                                | 11-13                          |
| 47 |                                  |                      |                                                                                                                                                                                                                                                                                                                                                          |                                |
| 48 |                                  |                      |                                                                                                                                                                                                                                                                                                                                                          |                                |
| 49 |                                  |                      |                                                                                                                                                                                                                                                                                                                                                          |                                |
| 50 |                                  |                      |                                                                                                                                                                                                                                                                                                                                                          |                                |
| 51 | Blinding (masking)               | <a href="#">#17a</a> | Who will be blinded after assignment to interventions (eg, trial participants, care providers, outcome assessors, data analysts), and how                                                                                                                                                                                                                | 13                             |
| 52 |                                  |                      |                                                                                                                                                                                                                                                                                                                                                          |                                |
| 53 |                                  |                      |                                                                                                                                                                                                                                                                                                                                                          |                                |
| 54 |                                  |                      |                                                                                                                                                                                                                                                                                                                                                          |                                |
| 55 |                                  |                      |                                                                                                                                                                                                                                                                                                                                                          |                                |
| 56 |                                  |                      |                                                                                                                                                                                                                                                                                                                                                          |                                |
| 57 |                                  |                      |                                                                                                                                                                                                                                                                                                                                                          |                                |
| 58 |                                  |                      |                                                                                                                                                                                                                                                                                                                                                          |                                |
| 59 |                                  |                      |                                                                                                                                                                                                                                                                                                                                                          |                                |
| 60 |                                  |                      |                                                                                                                                                                                                                                                                                                                                                          |                                |

|    |                        |                      |                                                                              |           |
|----|------------------------|----------------------|------------------------------------------------------------------------------|-----------|
| 1  | Blinding (masking):    | <a href="#">#17b</a> | If blinded, circumstances under which unblinding is permissible, and         | 20-21     |
| 2  |                        |                      |                                                                              |           |
| 3  | emergency unblinding   |                      | procedure for revealing a participant's allocated intervention during the    |           |
| 4  |                        |                      |                                                                              |           |
| 5  |                        |                      | trial                                                                        |           |
| 6  |                        |                      |                                                                              |           |
| 7  |                        |                      |                                                                              |           |
| 8  | <b>Methods: Data</b>   |                      |                                                                              |           |
| 9  | <b>collection,</b>     |                      |                                                                              |           |
| 10 | <b>management, and</b> |                      |                                                                              |           |
| 11 | <b>analysis</b>        |                      |                                                                              |           |
| 12 |                        |                      |                                                                              |           |
| 13 |                        |                      |                                                                              |           |
| 14 |                        |                      |                                                                              |           |
| 15 |                        |                      |                                                                              |           |
| 16 | Data collection plan   | <a href="#">#18a</a> | Plans for assessment and collection of outcome, baseline, and other trial    | 13,16-19, |
| 17 |                        |                      | data, including any related processes to promote data quality (eg,           | Table 2   |
| 18 |                        |                      | duplicate measurements, training of assessors) and a description of          |           |
| 19 |                        |                      | study instruments (eg, questionnaires, laboratory tests) along with their    |           |
| 20 |                        |                      | reliability and validity, if known. Reference to where data collection forms |           |
| 21 |                        |                      | can be found, if not in the protocol                                         |           |
| 22 |                        |                      |                                                                              |           |
| 23 |                        |                      |                                                                              |           |
| 24 |                        |                      |                                                                              |           |
| 25 |                        |                      |                                                                              |           |
| 26 |                        |                      |                                                                              |           |
| 27 |                        |                      |                                                                              |           |
| 28 | Data collection plan:  | <a href="#">#18b</a> | Plans to promote participant retention and complete follow-up, including     | 21-22     |
| 29 | retention              |                      | list of any outcome data to be collected for participants who discontinue    |           |
| 30 |                        |                      | or deviate from intervention protocols                                       |           |
| 31 |                        |                      |                                                                              |           |
| 32 |                        |                      |                                                                              |           |
| 33 |                        |                      |                                                                              |           |
| 34 |                        |                      |                                                                              |           |
| 35 | Data management        | <a href="#">#19</a>  | Plans for data entry, coding, security, and storage, including any related   | 19-20     |
| 36 |                        |                      | processes to promote data quality (eg, double data entry; range checks       |           |
| 37 |                        |                      | for data values). Reference to where details of data management              |           |
| 38 |                        |                      | procedures can be found, if not in the protocol                              |           |
| 39 |                        |                      |                                                                              |           |
| 40 |                        |                      |                                                                              |           |
| 41 |                        |                      |                                                                              |           |
| 42 |                        |                      |                                                                              |           |
| 43 | Statistics: outcomes   | <a href="#">#20a</a> | Statistical methods for analysing primary and secondary outcomes.            | 21-23     |
| 44 |                        |                      | Reference to where other details of the statistical analysis plan can be     |           |
| 45 |                        |                      | found, if not in the protocol                                                |           |
| 46 |                        |                      |                                                                              |           |
| 47 |                        |                      |                                                                              |           |
| 48 |                        |                      |                                                                              |           |
| 49 | Statistics: additional | <a href="#">#20b</a> | Methods for any additional analyses (eg, subgroup and adjusted               | 21-23     |
| 50 | analyses               |                      | analyses)                                                                    |           |
| 51 |                        |                      |                                                                              |           |
| 52 |                        |                      |                                                                              |           |
| 53 |                        |                      |                                                                              |           |
| 54 | Statistics: analysis   | <a href="#">#20c</a> | Definition of analysis population relating to protocol non-adherence (eg,    | 21-23     |
| 55 | population and         |                      | as randomised analysis), and any statistical methods to handle missing       |           |
| 56 | missing data           |                      | data (eg, multiple imputation)                                               |           |
| 57 |                        |                      |                                                                              |           |
| 58 |                        |                      |                                                                              |           |
| 59 |                        |                      |                                                                              |           |
| 60 |                        |                      |                                                                              |           |



|    |                            |                      |                                                                                  |
|----|----------------------------|----------------------|----------------------------------------------------------------------------------|
| 1  | <b>Methods: Monitoring</b> |                      |                                                                                  |
| 2  |                            |                      |                                                                                  |
| 3  |                            |                      |                                                                                  |
| 4  | Data monitoring:           | <a href="#">#21a</a> | Composition of data monitoring committee (DMC); summary of its role 21           |
| 5  |                            |                      |                                                                                  |
| 6  | formal committee           |                      | and reporting structure; statement of whether it is independent from the         |
| 7  |                            |                      | sponsor and competing interests; and reference to where further details          |
| 8  |                            |                      | about its charter can be found, if not in the protocol. Alternatively, an        |
| 9  |                            |                      | explanation of why a DMC is not needed                                           |
| 10 |                            |                      |                                                                                  |
| 11 |                            |                      |                                                                                  |
| 12 |                            |                      |                                                                                  |
| 13 |                            |                      |                                                                                  |
| 14 | Data monitoring:           | <a href="#">#21b</a> | Description of any interim analyses and stopping guidelines, including 21        |
| 15 |                            |                      |                                                                                  |
| 16 | interim analysis           |                      | who will have access to these interim results and make the final decision        |
| 17 |                            |                      | to terminate the trial                                                           |
| 18 |                            |                      |                                                                                  |
| 19 |                            |                      |                                                                                  |
| 20 |                            |                      |                                                                                  |
| 21 | Harms                      | <a href="#">#22</a>  | Plans for collecting, assessing, reporting, and managing solicited and 20-21     |
| 22 |                            |                      | spontaneously reported adverse events and other unintended effects of            |
| 23 |                            |                      | trial interventions or trial conduct                                             |
| 24 |                            |                      |                                                                                  |
| 25 |                            |                      |                                                                                  |
| 26 |                            |                      |                                                                                  |
| 27 | Auditing                   | <a href="#">#23</a>  | Frequency and procedures for auditing trial conduct, if any, and whether 21      |
| 28 |                            |                      | the process will be independent from investigators and the sponsor               |
| 29 |                            |                      |                                                                                  |
| 30 |                            |                      |                                                                                  |
| 31 |                            |                      |                                                                                  |
| 32 | <b>Ethics and</b>          |                      |                                                                                  |
| 33 | <b>dissemination</b>       |                      |                                                                                  |
| 34 |                            |                      |                                                                                  |
| 35 |                            |                      |                                                                                  |
| 36 | Research ethics            | <a href="#">#24</a>  | Plans for seeking research ethics committee / institutional review board 6,23,25 |
| 37 |                            |                      |                                                                                  |
| 38 | approval                   |                      | (REC / IRB) approval                                                             |
| 39 |                            |                      |                                                                                  |
| 40 |                            |                      |                                                                                  |
| 41 | Protocol amendments        | <a href="#">#25</a>  | Plans for communicating important protocol modifications (eg, changes 23         |
| 42 |                            |                      | to eligibility criteria, outcomes, analyses) to relevant parties (eg,            |
| 43 |                            |                      | investigators, REC / IRBs, trial participants, trial registries, journals,       |
| 44 |                            |                      | regulators)                                                                      |
| 45 |                            |                      |                                                                                  |
| 46 |                            |                      |                                                                                  |
| 47 |                            |                      |                                                                                  |
| 48 |                            |                      |                                                                                  |
| 49 | Consent or assent          | <a href="#">#26a</a> | Who will obtain informed consent or assent from potential trial 11               |
| 50 |                            |                      | participants or authorised surrogates, and how (see Item 32)                     |
| 51 |                            |                      |                                                                                  |
| 52 |                            |                      |                                                                                  |
| 53 |                            |                      |                                                                                  |
| 54 | Consent or assent:         | <a href="#">#26b</a> | Additional consent provisions for collection and use of participant data 11      |
| 55 |                            |                      |                                                                                  |
| 56 | ancillary studies          |                      | and biological specimens in ancillary studies, if applicable                     |
| 57 |                            |                      |                                                                                  |
| 58 |                            |                      |                                                                                  |
| 59 |                            |                      |                                                                                  |
| 60 |                            |                      |                                                                                  |

|    |                          |                      |                                                                              |       |
|----|--------------------------|----------------------|------------------------------------------------------------------------------|-------|
| 1  | Confidentiality          | <a href="#">#27</a>  | How personal information about potential and enrolled participants will be   | 19,20 |
| 2  |                          |                      | collected, shared, and maintained in order to protect confidentiality        |       |
| 3  |                          |                      | before, during, and after the trial                                          |       |
| 4  |                          |                      |                                                                              |       |
| 5  |                          |                      |                                                                              |       |
| 6  |                          |                      |                                                                              |       |
| 7  | Declaration of           | <a href="#">#28</a>  | Financial and other competing interests for principal investigators for the  | 25-26 |
| 8  | interests                |                      | overall trial and each study site                                            |       |
| 9  |                          |                      |                                                                              |       |
| 10 |                          |                      |                                                                              |       |
| 11 |                          |                      |                                                                              |       |
| 12 | Data access              | <a href="#">#29</a>  | Statement of who will have access to the final trial dataset, and            | 20,25 |
| 13 |                          |                      | disclosure of contractual agreements that limit such access for              |       |
| 14 |                          |                      | investigators                                                                |       |
| 15 |                          |                      |                                                                              |       |
| 16 |                          |                      |                                                                              |       |
| 17 |                          |                      |                                                                              |       |
| 18 | Ancillary and post trial | <a href="#">#30</a>  | Provisions, if any, for ancillary and post-trial care, and for compensation  | 20-21 |
| 19 | care                     |                      | to those who suffer harm from trial participation                            |       |
| 20 |                          |                      |                                                                              |       |
| 21 |                          |                      |                                                                              |       |
| 22 |                          |                      |                                                                              |       |
| 23 | Dissemination policy:    | <a href="#">#31a</a> | Plans for investigators and sponsor to communicate trial results to          | 6,23  |
| 24 | trial results            |                      | participants, healthcare professionals, the public, and other relevant       |       |
| 25 |                          |                      | groups (eg, via publication, reporting in results databases, or other data   |       |
| 26 |                          |                      | sharing arrangements), including any publication restrictions                |       |
| 27 |                          |                      |                                                                              |       |
| 28 |                          |                      |                                                                              |       |
| 29 |                          |                      |                                                                              |       |
| 30 |                          |                      |                                                                              |       |
| 31 | Dissemination policy:    | <a href="#">#31b</a> | Authorship eligibility guidelines and any intended use of professional       | 23    |
| 32 | authorship               |                      | writers                                                                      |       |
| 33 |                          |                      |                                                                              |       |
| 34 |                          |                      |                                                                              |       |
| 35 |                          |                      |                                                                              |       |
| 36 | Dissemination policy:    | <a href="#">#31c</a> | Plans, if any, for granting public access to the full protocol, participant- | 25    |
| 37 | reproducible research    |                      | level dataset, and statistical code                                          |       |
| 38 |                          |                      |                                                                              |       |
| 39 |                          |                      |                                                                              |       |
| 40 |                          |                      |                                                                              |       |
| 41 | <b>Appendices</b>        |                      |                                                                              |       |
| 42 |                          |                      |                                                                              |       |
| 43 |                          |                      |                                                                              |       |
| 44 | Informed consent         | <a href="#">#32</a>  | Model consent form and other related documentation given to                  | 11    |
| 45 | materials                |                      | participants and authorised surrogates                                       |       |
| 46 |                          |                      |                                                                              |       |
| 47 |                          |                      |                                                                              |       |
| 48 | Biological specimens     | <a href="#">#33</a>  | Plans for collection, laboratory evaluation, and storage of biological       | 14,19 |
| 49 |                          |                      | specimens for genetic or molecular analysis in the current trial and for     |       |
| 50 |                          |                      | future use in ancillary studies, if applicable                               |       |
| 51 |                          |                      |                                                                              |       |
| 52 |                          |                      |                                                                              |       |
| 53 |                          |                      |                                                                              |       |
| 54 |                          |                      |                                                                              |       |

None The SPIRIT Explanation and Elaboration paper is distributed under the terms of the Creative Commons Attribution License CC-BY-NC. This checklist can be completed online using <https://www.goodreports.org/>, a tool made by the EQUATOR Network in collaboration with [Penelope.ai](#)

For peer review only - <http://bmjopen.bmj.com/site/about/guidelines.xhtml>

# BMJ Open

## Alpha-2-adrenergic receptor agonists for the prevention of delirium and cognitive decline after open heart surgery (ALPHA2PREVENT): protocol for a multicentre randomised controlled trial

|                               |                                                                                                                                                                                                                                                                                                                                                                                                                                                                                                                                                                                                                                                                                                                                                                                                                                                                                                                                                                                                                                                                                                                                                                                                                                                                                                                                                                                                                                                                                                                                                                                                                                                                                                                                                                                                                                                                                                                                                                                                                                                                                                                                                                       |
|-------------------------------|-----------------------------------------------------------------------------------------------------------------------------------------------------------------------------------------------------------------------------------------------------------------------------------------------------------------------------------------------------------------------------------------------------------------------------------------------------------------------------------------------------------------------------------------------------------------------------------------------------------------------------------------------------------------------------------------------------------------------------------------------------------------------------------------------------------------------------------------------------------------------------------------------------------------------------------------------------------------------------------------------------------------------------------------------------------------------------------------------------------------------------------------------------------------------------------------------------------------------------------------------------------------------------------------------------------------------------------------------------------------------------------------------------------------------------------------------------------------------------------------------------------------------------------------------------------------------------------------------------------------------------------------------------------------------------------------------------------------------------------------------------------------------------------------------------------------------------------------------------------------------------------------------------------------------------------------------------------------------------------------------------------------------------------------------------------------------------------------------------------------------------------------------------------------------|
| Journal:                      | <i>BMJ Open</i>                                                                                                                                                                                                                                                                                                                                                                                                                                                                                                                                                                                                                                                                                                                                                                                                                                                                                                                                                                                                                                                                                                                                                                                                                                                                                                                                                                                                                                                                                                                                                                                                                                                                                                                                                                                                                                                                                                                                                                                                                                                                                                                                                       |
| Manuscript ID                 | bmjopen-2021-057460.R1                                                                                                                                                                                                                                                                                                                                                                                                                                                                                                                                                                                                                                                                                                                                                                                                                                                                                                                                                                                                                                                                                                                                                                                                                                                                                                                                                                                                                                                                                                                                                                                                                                                                                                                                                                                                                                                                                                                                                                                                                                                                                                                                                |
| Article Type:                 | Protocol                                                                                                                                                                                                                                                                                                                                                                                                                                                                                                                                                                                                                                                                                                                                                                                                                                                                                                                                                                                                                                                                                                                                                                                                                                                                                                                                                                                                                                                                                                                                                                                                                                                                                                                                                                                                                                                                                                                                                                                                                                                                                                                                                              |
| Date Submitted by the Author: | 25-Feb-2022                                                                                                                                                                                                                                                                                                                                                                                                                                                                                                                                                                                                                                                                                                                                                                                                                                                                                                                                                                                                                                                                                                                                                                                                                                                                                                                                                                                                                                                                                                                                                                                                                                                                                                                                                                                                                                                                                                                                                                                                                                                                                                                                                           |
| Complete List of Authors:     | <p>Neerland, Bjørn; Oslo University Hospital, Department of Geriatric Medicine</p> <p>Busund, Rolf; University Hospital of North Norway, Department of Cardiothoracic and Vascular Surgery; UiT The Arctic University of Norway, Institute of Clinical Medicine</p> <p>Haaverstad, Rune; Haukeland University Hospital, Heart Disease; University of Bergen, Clinical Science</p> <p>Helbostad, Jorunn; Norwegian University of Science and Technology</p> <p>Landsverk, Svein Aslak; Oslo University Hospital, Department of Anaesthesiology</p> <p>Martinaityte, Ieva; UiT The Arctic University of Norway; University Hospital of North Norway, Department of Geriatric medicine</p> <p>Norum, Hilde Margrethe; Oslo University Hospital, Department of Anaesthesiology; Oslo University Hospital, Department of Research and Development</p> <p>Ræder, Johan ; Universitetet i Oslo Institutt for klinisk medisin, Anesthesiology</p> <p>Selbaek, Geir; Innlandet Hospital Trust, Centre for Old Age Psychiatric Research; Oslo University Hospital, Department of Geriatric Medicine</p> <p>Simpson, Melanie R.; Norwegian University of Science and Technology, Department of Public Health and Nursing</p> <p>Skaar, Elisabeth; Haukeland University Hospital, Department of Heart Disease</p> <p>Skjærvold, Nils Kristian; Norwegian University of Science and Technology, Department of Circulation and Medical Imaging; Trondheim University Hospital, Department of Anesthesia and Intensive Care Medicine</p> <p>Skovlund, Eva; Norwegian University of Science and Technology</p> <p>Slooter, Arjen ; University Medical Centre Utrecht Brain Centre; Vrije Universiteit Brussel</p> <p>Svendsen, Øyvind Sverre; Haukeland University Hospital, Department of Anesthesia and Intensive Care; University of Bergen, Department of Clinical Medicine</p> <p>Tønnessen, Theis; University of Oslo, Institute of Clinical Medicine; Oslo University Hospital, Department of Cardiothoracic Surgery</p> <p>Wahba, Alexander; Norwegian University of Science and Technology, Department of Circulation and Medical Imaging; Trondheim University Hospital</p> |

|                                                    |                                                                                                                                                                                                                                                                                                                       |
|----------------------------------------------------|-----------------------------------------------------------------------------------------------------------------------------------------------------------------------------------------------------------------------------------------------------------------------------------------------------------------------|
|                                                    | Zetterberg, Henrik; University of Gothenburg Sahlgrenska Academy, Department of Psychiatry and Neurochemistry; UCL Institute of Neurology, Department of Neurodegenerative Disease<br>Wyller, Torgeir; Oslo University Hospital, Department of Geriatric Medicine; University of Oslo, Institute of Clinical Medicine |
| <b>&lt;b&gt;Primary Subject Heading&lt;/b&gt;:</b> | Anaesthesia                                                                                                                                                                                                                                                                                                           |
| Secondary Subject Heading:                         | Geriatric medicine                                                                                                                                                                                                                                                                                                    |
| Keywords:                                          | Cardiac surgery < SURGERY, Delirium & cognitive disorders < PSYCHIATRY, Adult anaesthesia < ANAESTHETICS, GERIATRIC MEDICINE                                                                                                                                                                                          |
|                                                    |                                                                                                                                                                                                                                                                                                                       |

SCHOLARONE™  
Manuscripts

1  
2  
3 1 **TITLE PAGE**  
4  
5

6 2 **Title:** Alpha-2-adrenergic receptor agonists for the prevention of delirium and cognitive decline after  
7  
8 3 open heart surgery (ALPHA2PREVENT): protocol for a multicentre randomised controlled trial  
9  
10

11 4  
12  
13

14 5 **Authors and affiliations:**  
15  
16

17 6 Neerland, Bjørn Erik 1  
18  
19

20 7 Busund, Rolf 2,3  
21  
22

23 8 Haaverstad, Rune 4,5  
24  
25

26 9 Helbostad, Jorunn Lægdheim 6  
27  
28

29 10 Landsverk, Svein Aslak 7  
30  
31

32 11 Martinaityte, Ieva 3,8  
33  
34

35 12 Norum, Hilde Margrethe 7, 9  
36  
37

38 13 Ræder, Johan 7,10  
39  
40

41 14 Selbæk, Geir 1, 10, 11  
42  
43

44 15 Simpson, Melanie Rae 12  
45  
46

47 16 Skaar, Elisabeth 13  
48  
49

50 17 Skjærvold, Nils Kristian 14, 15  
51  
52

53 18 Skovlund, Eva 12  
54  
55

56 19 Slooter, Arjen 16, 17  
57  
58  
59  
60

- 1  
2  
3 20 Svendsen, Øyvind Sverre 18, 19  
4  
5  
6 21 Tønnessen, Theis 10, 20  
7  
8  
9 22 Wahba, Alexander 13, 21  
10  
11  
12 23 Zetterberg, Henrik 22, 23, 24, 25, 26  
13  
14  
15 24 Wyller, Torgeir Bruun 1, 10  
16  
17  
18 25  
19  
20  
21 26 1) Oslo Delirium Research Group, Department of Geriatric Medicine, Oslo University Hospital,  
22  
23 Oslo, Norway  
24 27  
25 26 2) Department of Cardiothoracic and Vascular Surgery, University Hospital of North Norway,  
27  
28 Tromsø, Norway  
29 29  
30 30 3) Institute of Clinical Medicine, UiT The Arctic University of Norway, Tromsø, Norway.  
31  
32 31 4) Section of Cardiothoracic Surgery, Department of Heart Disease, Haukeland University  
33  
34 Hospital, Bergen, Norway  
35 32  
36 37 33 5) Institute of Clinical Science, Medical Faculty, University of Bergen, Bergen, Norway  
38  
39 34 6) Department of Neuromedicine and Movement Science, Faculty of Medicine and Health  
40  
41 Sciences, Norwegian University of Science and Technology, Trondheim, Norway  
42 35  
43 36 7) Department of Anaesthesiology, Division of Emergencies and Critical Care, Oslo University  
44  
45 Hospital, Oslo, Norway  
46 37  
47 38 8) Department of Geriatric medicine, University Hospital of North Norway, Tromsø, Norway  
48  
49 39 9) Department of Research and Development, Division of Emergencies and Critical Care, Oslo  
50  
51 University Hospital, Oslo, Norway  
52 40  
53 41 10) Institute of Clinical Medicine, University of Oslo, Oslo, Norway  
54  
55 42 11) Norwegian National Advisory Unit on Ageing and Health, Vestfold Hospital Trust, Tønsberg,  
56  
57 Norway.  
58  
59  
60

- 1  
2  
3 44 12) Department of Public Health and Nursing, Norwegian University of Science and Technology,  
4  
5 45 Trondheim, Norway  
6  
7 46 13) Department of Heart Disease, Haukeland University Hospital, Bergen, Norway  
8  
9 47 14) Department of Circulation and Medical Imaging, Norwegian University of Science and  
10  
11 48 Technology, Trondheim, Norway  
12  
13 49 15) Department of Anesthesia and Intensive Care Medicine, Trondheim University Hospital,  
14  
15 50 Trondheim, Norway  
16  
17 51 16) Department of Intensive Care Medicine and UMC Utrecht Brain Center, University Medical  
18  
19 52 Center Utrecht, Utrecht University, Utrecht, the Netherlands  
20  
21 53 17) Department of Neurology, UZ Brussel and Vrije Universiteit Brussel, Brussels, Belgium  
22  
23 54 18) Department of Anesthesia and Intensive Care, Haukeland University Hospital, Bergen,  
24  
25 55 Norway  
26  
27 56 19) Department of Clinical Medicine, University of Bergen, Bergen, Norway  
28  
29 57 20) Department of Cardiothoracic Surgery, Oslo University Hospital, Oslo, Norway  
30  
31 58 21) Clinic of Cardiothoracic Surgery, Trondheim University Hospital, Trondheim, Norway  
32  
33 59 22) Department of Psychiatry and Neurochemistry, Institute of Neuroscience and Physiology, the  
34  
35 60 Sahlgrenska Academy at the University of Gothenburg, Mölndal, Sweden  
36  
37 61 23) Clinical Neurochemistry Laboratory, Sahlgrenska University Hospital, Mölndal, Sweden  
38  
39 62 24) Department of Neurodegenerative Disease, UCL Institute of Neurology, Queen Square,  
40  
41 63 London, UK  
42  
43 64 25) UK Dementia Research Institute at UCL, London, UK  
44  
45 65 26) Hong Kong Center for Neurodegenerative Diseases, Hong Kong, China  
46  
47  
48  
49  
50  
51  
52

53 **Corresponding author:** Dr. Bjørn Erik Neerland ([bjonee@ous-hf.no](mailto:bjonee@ous-hf.no))  
54  
55

56 **Address:** Oslo Delirium Research Group, Department of Geriatric Medicine, Oslo University Hospital,  
57  
58 Pb 4950 Nydalen, 0424 Oslo, Norway  
59  
60

- 1  
2  
3 69 **Telephone:** +47 90078979  
4  
5  
6 70 **Twitter:** Bjørn Erik Neerland @beneerland  
7  
8  
9 71 **ORCID number:** 0000-0001-5335-9146  
10  
11  
12 72 **Other ORCID numbers:**  
13  
14  
15 73 Rune Haaverstad: 0000-0002-3242-7602  
16  
17  
18 74 Jorunn L Helbostad: 0000-0003-0214-9290  
19  
20  
21 75 Svein Aslak Landsverk: 0000-0002-93445708  
22  
23  
24 76 Ieva Martinaityte: 0000-0002-6873-2852  
25  
26  
27 77 Hilde Margrethe Norum: 0000-0001-8123-7488  
28  
29  
30 78 Geir Selbæk: 0000-0001-6511-8219  
31  
32  
33 79 Melanie Rae Simpson: 0000-0003-2763-6343  
34  
35  
36 80 Nils Kristian Skjærvold: 0000-0002-0085-7042  
37  
38  
39 81 Eva Skovlund: 0000-0002-2997-6141  
40  
41  
42 82 Arjen Slooter: 0000-0003-0804-8378  
43  
44  
45 83 Øyvind Sverre Svendsen: 0000-0003-3553-9084  
46  
47  
48 84 Alexander Wahba: 0000-0001-7838-8162  
49  
50  
51 85 Henrik Zetterberg: 0000-0003-3930-4354  
52  
53  
54 86 Torgeir Bruun Wyller: 0000-0002-0330-9471  
55  
56  
57  
58 87  
59  
60



1  
2  
3 88  
4  
5

6 89 **Word count:** Abstract = 277 words. Body = 4606 words  
7  
8

9 90  
10  
11

12 91 **Key words:** delirium, prevention, dexmedetomidine, clonidine, cardiac surgery, frailty, older,  
13

14 92 cognitive decline  
15  
16

17 93  
18  
19

20 94  
21  
22  
23  
24  
25  
26  
27  
28  
29  
30  
31  
32  
33  
34  
35  
36  
37  
38  
39  
40  
41  
42  
43  
44  
45  
46  
47  
48  
49  
50  
51  
52  
53  
54  
55  
56  
57  
58  
59  
60

For peer review only

95 **ABSTRACT**

96 **Introduction:** Postoperative delirium is common in older cardiac surgery patients and associated with  
97 negative short-term and long-term outcomes. The alpha-2-adrenergic receptor agonist  
98 dexmedetomidine shows promise as prophylaxis and treatment for delirium in intensive care units  
99 (ICU) and postoperative settings. Clonidine has similar pharmacological properties and can be  
100 administered both parenterally and orally. We aim to study whether repurposing of clonidine can  
101 represent a novel treatment option for delirium, and the possible effects of dexmedetomidine and  
102 clonidine on long-term cognitive trajectories, motor activity patterns and biomarkers of neuronal  
103 injury, and whether these effects are associated with frailty status.

104 **Methods and analysis:** This five-centre, double blind randomised controlled trial will include 900  
105 cardiac surgery patients aged 70+. Participants will be randomized 1:1:1 to dexmedetomidine or  
106 clonidine or placebo. The study drug will be given as a continuous intravenous infusion from the start  
107 of cardiopulmonary bypass, at a rate of 0.4 µg/kg/h. The infusion rate will be decreased to 0.2  
108 µg/kg/h postoperatively and be continued until discharge from the ICU or 24 hours postoperatively,  
109 whichever happens first.

110 Primary endpoint is the 7-day cumulative incidence of postoperative delirium (Diagnostic and  
111 Statistical Manual of Mental Disorders, 5th edition). Secondary endpoints include the composite  
112 endpoint of coma, delirium or death, in addition to delirium severity and motor activity patterns,  
113 levels of circulating biomarkers of neuronal injury, cognitive function and frailty status 1 and 6  
114 months after surgery.

115 **Ethics and dissemination:** This trial is approved by the Regional Committee for Ethics in Medical  
116 Research in Norway (South-East Norway) and by the Norwegian Medicines Agency. Dissemination  
117 plans include publication in peer-reviewed medical journals and presentation at scientific meetings.

118 **Trial registration number:** EudraCT: 2021-001645-12. ClinicalTrials.gov: NCT05029050

1  
2  
3 119 **STRENGTHS AND LIMITATIONS OF THIS STUDY**  
4  
5

- 6 120 • This multicentre trial will provide evidence for prophylactic efficacy of dexmedetomidine and  
7  
8 121 clonidine in reducing the incidence of postoperative delirium as well as decline in cognitive  
9  
10 122 function 1 and 6 months postoperatively in older cardiac surgical patients  
11  
12  
13 123 • Inclusion of preoperative frailty assessments will provide evidence for frailty as a predictive  
14  
15 124 marker of treatment effect  
16  
17 125 • The analysis of biomarkers will provide insights into the neural mechanisms in postoperative  
18  
19 126 delirium and long-term cognitive dysfunction  
20  
21  
22 127 • The analysis of activity by accelerometers will provide insight into motor activity patterns in  
23  
24 128 subtypes of delirium  
25  
26 129 • The dose of the active drugs may potentially be too low or the duration of treatment too  
27  
28 130 short in order to show effects  
29  
30  
31  
32  
33  
34  
35  
36  
37  
38  
39  
40  
41  
42  
43  
44  
45  
46  
47  
48  
49  
50  
51  
52  
53  
54  
55  
56  
57  
58  
59  
60

## 131 **BACKGROUND**

132 Delirium represents an acute change in awareness, attention and cognition, precipitated by an acute  
133 illness, trauma, intoxication or surgery.<sup>1,2</sup> Common additional features are agitation, hallucinations  
134 and poor compliance with medical treatment and care.

135 Delirium appears in all parts of the health care service, including intensive care units (ICUs) and  
136 postoperative settings, regular hospital wards, nursing homes, home nursing services and palliative  
137 departments. In a recent meta-analysis, Greaves and co-workers found a delirium prevalence of 24%  
138 postoperatively after coronary artery bypass grafting (CABG) surgery, aggregated over all age  
139 groups.<sup>3</sup> In a Norwegian study of patients  $\geq 80$  years undergoing open aortic valve replacement, the  
140 prevalence of postoperative delirium was above 60%.<sup>4</sup> Open heart surgery patients are especially  
141 susceptible to delirium. Probable causes may be established cardiovascular disease, micro-embolism  
142 from cardiopulmonary bypass (CPB), perioperative circulatory changes including ischemia-  
143 reperfusion injuries, systemic inflammation, blood-brain barrier disruption and very deep  
144 anaesthesia.<sup>5,6</sup>

145 Delirium is difficult to handle in clinical settings, increases length of hospital stay and the need for  
146 long-term care,<sup>7,8,9</sup> is expensive for the society,<sup>10</sup> represents a frightening experience for the patient  
147 and the relatives,<sup>11</sup> and is an independent risk factor for death after cardiac surgery.<sup>12</sup> Delirium is an  
148 independent risk factor for cognitive decline in older adults, and induces a more rapid trajectory of  
149 deterioration in those who already have dementia.<sup>13,14</sup>

150 Frailty is a risk factor for delirium,<sup>15</sup> but less is known regarding how frailty assessments can guide  
151 prophylactic and therapeutic measures and shared decision making.<sup>16</sup> Frailty is a state of impaired  
152 physiologic reserve and decreased resistance to stressors, which increases the risk of an adverse  
153 outcome.<sup>17,18</sup> It is a consequence of cumulative decline in many physiological systems.

1  
2  
3 154 Conventionally, delirium has been separated into hyperactive and hypoactive subtypes based on  
4  
5 155 clinical impression,<sup>19</sup> but recent research using body-worn sensors indicates a more heterogeneous  
6  
7 156 pattern of motor activity across the clinical delirium motor subtypes.<sup>20 21</sup> Small light-weight body-  
8  
9  
10 157 worn accelerometers may provide objective measures of the effectiveness of delirium treatment  
11  
12 158 intervention on motor activity level and types of patterns. A small postoperative study on cardiac  
13  
14 159 surgery patients showed the possibility of detecting the amount of movement in sedated patients.<sup>22</sup>

160 Delirium is multifactorial and relate to both predisposing and to precipitating factors.<sup>1,2</sup> Routinely,  
161 several actions are taken in perioperative care to minimize the risk of delirium, such as appropriate  
162 management of pain and minimizing the use of sedative drugs like benzodiazepines. Further, non-  
163 pharmacological multicomponent interventions are essential,<sup>23</sup> but there is currently no compelling  
164 evidence to support the use of specific prophylactic pharmacological measures in routine  
165 perioperative care for patients at risk of postoperative delirium.<sup>24</sup>

166 However, dexmedetomidine, a parenterally administered alpha-2-adrenergic receptor agonist that  
167 attenuates sympathetic nervous system activity, shows promise as prophylaxis and treatment for  
168 delirium in ICUs and postoperative settings.<sup>25 26</sup> It has been hypothesised that dexmedetomidine may  
169 reduce postoperative delirium via its sympatholytic, anti-inflammatory and organ-protective  
170 effects.<sup>27 28</sup> In a recent meta-analysis, perioperative use of dexmedetomidine in various surgical  
171 procedures was associated with a lower incidence of postoperative delirium. The relative risk (RR)  
172 and 95% confidence interval (CI) was 0.52 (0.39-0.70) when compared with placebo.<sup>25</sup> Among newer  
173 studies in cardiac surgery, some,<sup>29-32</sup> but not all,<sup>33 34</sup> have found a beneficial short time effect on the  
174 incidence of delirium. A meta-analysis in cardiac surgery patients showed that dexmedetomidine  
175 could reduce the risk of postoperative delirium (Odds Ratio 0.56, 95% CI 0.36-0.89).<sup>35</sup> This meta-  
176 analysis even included the largest trial by Turan et al., with 800 participants, that was negative for  
177 dexmedetomidine.<sup>34</sup> To the best of our knowledge, effects of dexmedetomidine upon long time

1  
2  
3 178 cognitive trajectories have so far not been assessed in this patient population. Nevertheless, the use  
4  
5 179 of dexmedetomidine in ICUs is rapidly increasing.<sup>26</sup>  
6  
7

8 180 An alternative agent is clonidine, which has similar pharmacological properties to  
9  
10 181 dexmedetomidine,<sup>36</sup> even though it's alpha-2-adrenergic selectivity is lower.<sup>37</sup> Clonidine can be  
11  
12 182 administered both parenterally and orally, thus potentially widening its clinical usefulness.<sup>36 37</sup>  
13  
14 183 Clonidine was originally launched as an antihypertensive agent, but it is also used as an analgesic  
15  
16 184 drug. Further, clonidine has a long tradition as a sedative in patients with hyperactive delirium, and is  
17  
18 185 used by several anaesthesiologists and intensivists.<sup>38</sup> This practice is based on their clinical  
19  
20 186 experiences and knowledge on the drug's properties, but is so far not supported by placebo-  
21  
22 187 controlled clinical trials. A pilot study indicated that clonidine infusion during the period of weaning  
23  
24 188 from mechanical ventilation after surgery for aortic dissection may reduce the severity of delirium.<sup>39</sup>  
25  
26 189 A recent study compared clonidine with dexmedetomidine postoperatively after CABG and found  
27  
28 190 better effect on risk and duration of delirium of dexmedetomidine. Since no placebo control group  
29  
30 191 was included, that study could not assess potential effects of clonidine.<sup>40</sup>  
31  
32  
33  
34  
35

36 192 Thus, there is a need for prospective large-scale studies on the potential prophylactic effect of alpha-  
37  
38 193 2-adrenergic receptor agonists on delirium in susceptible patients. The aims of the present planned  
39  
40 194 trial are to study 1) whether repurposing of clonidine can represent a novel treatment option for  
41  
42 195 delirium, and 2) the possible effects of dexmedetomidine and clonidine on long-term cognitive  
43  
44 196 trajectories, motor activity patterns, patient rated outcome measures and biomarkers of neuronal  
45  
46 197 injury, and 3) whether these effects are associated with frailty status.  
47  
48  
49

50 198

51  
52  
53 199  
54  
55  
56  
57  
58  
59  
60

1  
2  
3 200 **METHODS AND ANALYSIS**  
4  
5

6 201 **Study design**  
7  
8

9 202 ALPHA2PREVENT is a nationwide five-centre, double blind randomised controlled trial (RCT). Patients  
10  
11 203 aged 70+ scheduled for open heart surgery will be randomized 1:1:1 to dexmedetomidine or  
12  
13 204 clonidine or placebo. The patients will be cognitively assessed preoperatively, then assessed for any  
14  
15 205 symptoms of delirium according to the Diagnostic and Statistical Manual of Mental Disorders, 5th  
16  
17 206 edition (DSM-5) criteria<sup>41</sup> or subsyndromal delirium<sup>42</sup> postoperatively, and finally assessed for  
18  
19 207 cognitive function after 1 and 6 months (figure 1).  
20  
21  
22

23 208 **Study locations**  
24  
25

26 209 The trial will be carried out at Oslo University Hospital (Ullevaal and Rikshospitalet) in Oslo,  
27  
28 210 Haukeland University Hospital in Bergen, Trondheim University Hospital in Trondheim, and the  
29  
30 211 University Hospital of Northern Norway in Tromsø, all in Norway.  
31  
32  
33

34 212 **Participants, randomisation and blinding**  
35  
36

37 213 Patients will be assessed for eligibility and asked for participation in cooperation with the responsible  
38  
39 214 thoracic surgeons or anaesthesiologists. A full listing of trial inclusion and exclusion criteria is  
40  
41 215 displayed in table 1. Participants must be  $\geq 70$  years old, accepted for cardiac surgery with CPB and  
42  
43 216 capable of giving signed informed consent. The surgical procedures may constitute CABG, valve  
44  
45 217 replacement, surgery on the ascending aorta, or combinations of these. Main exclusion criteria are  
46  
47 218 bradycardia, uncontrolled hypotension, ischemic stroke the last month or acute coronary syndrome  
48  
49 219 last 24 hours,<sup>43</sup> left ventricular ejection fraction  $< 40\%$ , severe renal failure or hepatic dysfunction,  
50  
51 220 sepsis, planned deep hypothermia and circulatory arrest, as well as emergency surgery.  
52  
53  
54  
55

56 221 **Table 1. Inclusion and exclusion criteria**  
57  
58  
59  
60

|                                                                                                                                                                                                                                                                                                                                                                                                                                                                                                   |                                                                                                                                                                                                                                                                                                                                                                                                                                                                                                                                                                                                                                                                                                                                                                                                                                                                                                                                                                                                                |
|---------------------------------------------------------------------------------------------------------------------------------------------------------------------------------------------------------------------------------------------------------------------------------------------------------------------------------------------------------------------------------------------------------------------------------------------------------------------------------------------------|----------------------------------------------------------------------------------------------------------------------------------------------------------------------------------------------------------------------------------------------------------------------------------------------------------------------------------------------------------------------------------------------------------------------------------------------------------------------------------------------------------------------------------------------------------------------------------------------------------------------------------------------------------------------------------------------------------------------------------------------------------------------------------------------------------------------------------------------------------------------------------------------------------------------------------------------------------------------------------------------------------------|
| <p>Participants are eligible to be included in the study only if all of the following criteria apply:</p>                                                                                                                                                                                                                                                                                                                                                                                         | <p>Participants are excluded from the study if any of the following criteria apply:</p>                                                                                                                                                                                                                                                                                                                                                                                                                                                                                                                                                                                                                                                                                                                                                                                                                                                                                                                        |
| <p>1. Participant must be <math>\geq 70</math> years old at the time of signing the informed consent.</p> <p>2. Participant must be accepted for cardiac surgery with cardiopulmonary bypass. The surgical procedures may constitute 1) coronary bypass grafting, 2) tricuspid, mitral, or aortic valve replacement or repair, 3) surgery on the ascending aorta, and 4) the combination of any of these procedures.</p> <p>3. Participant must be capable of giving signed informed consent.</p> | <p>4. Preoperative delirium (present at time of potential inclusion)</p> <p>5. Known hypersensitivity to the active ingredient or components of the product</p> <p>6. Bradycardia due to sick-sinus-syndrome, 2nd or 3rd degree AV-block (if not treated with pacemaker) or any other reason causing HR <math>&lt; 50</math> bpm at time of inclusion</p> <p>7. Uncontrolled hypotension</p> <p>8. Ischemic stroke or transitory ischemic attack the last month or critical peripheral ischemia</p> <p>9. Acute coronary syndrome last 24 hours. Acute coronary syndrome is defined according to international guidelines</p> <p>10. Left ventricular ejection fraction <math>&lt; 40\%</math></p> <p>11. Severe renal impairment (estimated GFR <math>&lt; 20</math> ml/min) or expected requirement for renal replacement therapy</p> <p>12. Severe hepatic dysfunction (liver enzyme three times the upper limit of normal together with a serum albumin concentration below the normal reference limit</p> |



|  |                                                                                                                                                                                                                                                                                                                                                                                                                                                                                                                                                               |
|--|---------------------------------------------------------------------------------------------------------------------------------------------------------------------------------------------------------------------------------------------------------------------------------------------------------------------------------------------------------------------------------------------------------------------------------------------------------------------------------------------------------------------------------------------------------------|
|  | <p>13. Reduced peripheral autonomous activity (e.g., spinal cord injury)</p> <p>14. Current use of tricyclic antidepressants, monoamine reuptake inhibitors or ciclosporin</p> <p>15. Endocarditis or sepsis</p> <p>16. Pheochromocytoma</p> <p>17. Planned deep hypothermia and circulatory arrest</p> <p>18. Emergency surgery, defined as less than 24 hours from admission to surgery</p> <p>19. Previously included in this study</p> <p>20. Not speaking or reading Norwegian</p> <p>21. Any other condition as evaluated by the treating physician</p> |
|--|---------------------------------------------------------------------------------------------------------------------------------------------------------------------------------------------------------------------------------------------------------------------------------------------------------------------------------------------------------------------------------------------------------------------------------------------------------------------------------------------------------------------------------------------------------------|

222 AV-block, atrioventricular block; HR, heart rate; GFR, glomerular filtration rate

223 Consenting patients will be randomly assigned 1:1:1, to dexmedetomidine, clonidine or placebo.

224 Randomization will be computer generated with random permuted block sizes of 3 or 6, and  
 225 stratified according to study centre. Allocation will be concealed by a web-based system that can be  
 226 accessed no earlier than 3 days before surgery. The study drug will be prepared by an otherwise  
 227 uninvolved research associate, ensuring that investigators, clinicians, outcome assessors and  
 228 statisticians are blinded to the group assignment.

#### 229 **Data collected at study entry**

230 The data collection will take place in connection with routine clinical care at the relevant hospital  
 231 wards and the ICU (table 2). According to the selection criteria, electrocardiogram (ECG),

232 creatinine/estimated Glomerular Filtration Rate (eGFR), liver transaminases, albumin, and a recent  
 233 echo-cardiography will be required, as well as a screening for preoperative delirium. At study entry,  
 234 demographic data, medical history including cardiovascular and non-cardiovascular co-morbidities,  
 235 prescription drugs used, sensory impairment, presence or absence of any fall within the past year,  
 236 functional status including activities of daily living, surgical site and indication for surgery will be  
 237 obtained. Haemodynamic variables, body mass index, American Society of Anesthesiologists Physical  
 238 Status (ASA)-classification and Euroscore II will be recorded, and routine blood samples taken prior to  
 239 surgery will be registered. Blood samples for biomarkers will be drawn preoperatively and on  
 240 postoperative day 1, 3 and 5. Included patients will undergo preoperative cognitive tests and physical  
 241 tests for assessment of frailty. Patient rated outcome measures (PROMs) will be assessed by use of  
 242 the Norwegian version of the EuroQol 5 Dimension 5 Level (EQ-5D-5L) questionnaire.<sup>44</sup> The same  
 243 tests and questionnaires will be used also after 1 and 6 months, for assessment of cognitive and  
 244 functional trajectories.

245 **Table 2. Study procedures**

| Procedure                                                                             | Screening             | Baseline                   | Surgery | Postoperative day number: |   |   |   |   |   |   | Hospital discharge | 1 and 6 months |  |
|---------------------------------------------------------------------------------------|-----------------------|----------------------------|---------|---------------------------|---|---|---|---|---|---|--------------------|----------------|--|
|                                                                                       | ≤30 days before Day 0 | -3 to -1 days before Day 0 | Day 0   | 1                         | 2 | 3 | 4 | 5 | 6 | 7 |                    |                |  |
| Informed consent                                                                      | X                     |                            |         |                           |   |   |   |   |   |   |                    |                |  |
| Assessment of eligibility                                                             | X                     |                            |         |                           |   |   |   |   |   |   |                    |                |  |
| Routine blood tests (i.e. creatinine, liver transaminases, albumin, troponin, proBNP) | X                     |                            |         |                           |   |   |   |   |   |   |                    | X              |  |
| ECG                                                                                   | X                     |                            |         | X                         |   |   |   |   |   |   |                    |                |  |
| Physical examination                                                                  | X                     |                            |         |                           |   |   |   |   |   |   |                    |                |  |







1  
2  
3 265 delirium develops and pharmacological intervention is needed, the study drug will be stopped, and  
4  
5 266 further treatment will be according to local routines and the treating physician's preferences.  
6  
7

8 267 **Primary endpoint**  
9

10  
11 268 The primary endpoint for ALPHA2PREVENT is the cumulative incidence of postoperative delirium  
12  
13 269 within 7 days. Postoperative delirium assessment will start as soon as possible after admission to the  
14  
15 270 ICU, and will continue daily until the seventh postoperative day or until discharge from the university  
16  
17 271 hospital, whichever happens first. To allow for differences in the duration of the postoperative  
18  
19 272 observation period, time until delirium diagnosis will be recorded and the cumulative incidence will  
20  
21 273 be assessed using Kaplan Meier estimates and compared between groups with the log-rank test as  
22  
23 274 described below. A clinical assessment for delirium will also be repeated at the 1-month follow-up, to  
24  
25 275 pick up signs of persistent delirium.  
26  
27  
28  
29

30 276 The diagnosis of delirium will be ascertained using all available information, and will be determined  
31  
32 277 to be present if participants meet all DSM-5 criteria<sup>41</sup> by using a standardized procedure developed  
33  
34 278 for our previous study<sup>45</sup> and as recommended by others<sup>46</sup>, table 3. The methods are refined in order,  
35  
36 279 in a stepwise approach, to assess presence or absence of the diagnostic criteria in DSM-5 and will be  
37  
38 280 carried out once daily by specially trained research assistants. Level of arousal will be assessed using  
39  
40 281 the Norwegian versions of Richmond Agitation Sedation Scale (RASS)<sup>47</sup> and Observational Scale of  
41  
42 282 Level of Arousal (OSLA).<sup>48</sup> Attention and awareness will be evaluated using objective tests (vigilance  
43  
44 283 "A"-test, months of the years backwards, days of the week backwards, and counting down from 20 to  
45  
46 284 1)<sup>49</sup> and observations by the examiner of the patient's distractibility, comprehension and tendency to  
47  
48 285 lose the thread of conversation. Presence of additional cognitive disturbances will be assessed by  
49  
50 286 tests for orientation and recall test of three words (different words for each day), as well as  
51  
52 287 information derived from nursing staff and clinical notes. Acute change in the patient's mental  
53  
54 288 condition, and fluctuations of any disturbance, will be ascertained through informant history from  
55  
56 289 nursing staff and derived from clinical notes. Nurses will, as part of their routine and for each shift  
57  
58  
59  
60

290 (i.e., three times daily), actively register symptoms of delirium in the case notes, as well as screen for  
 291 delirium using the Norwegian version of the Confusion Assessment Method for Intensive Care Units  
 292 (CAM-ICU)<sup>50</sup> and RASS. The same delirium assessment tools will be used for the ICU, step-down and  
 293 bed wards. The results from each of the CAM-ICU-items, as well as the total CAM-ICU score, will also  
 294 be used as a source of information for making the final delirium diagnosis.

295 Finally, as a quality assurance, two or more highly experienced delirium researchers will  
 296 independently use all available information (including the research assistants' assessments) on each  
 297 patient to decide if the DSM-5 criteria for delirium are fulfilled. An interrater agreement for the  
 298 diagnosis of delirium will be calculated and disagreements will be resolved through discussion.

299 Subsyndromal delirium (table 3) will be defined as evidence of change, in addition to any one of  
 300 these: altered arousal, attentional deficits, other cognitive change, delusions or hallucinations. DSM-  
 301 5 delirium criteria D and E must be met.

303 **Table 3. Diagnostic algorithm for DSM-5 delirium.**

| DSM-5 criteria                                                                                                                                                           | Tests to be performed or information needed |                                            | Criterium fulfilled? |    |
|--------------------------------------------------------------------------------------------------------------------------------------------------------------------------|---------------------------------------------|--------------------------------------------|----------------------|----|
|                                                                                                                                                                          |                                             |                                            | Yes                  | No |
| A. Disturbance in <b>attention</b> (i.e., reduced ability to direct, focus, sustain, and shift attention) and <b>awareness</b> (reduced orientation to the environment). | <b>TEST</b>                                 | <b>Cut off (definition of inattention)</b> |                      |    |
|                                                                                                                                                                          | <b>Digit span forward</b>                   | less than 5 forward                        |                      |    |
|                                                                                                                                                                          | <b>SAVEAHAART</b>                           | more than 2 errors                         |                      |    |
|                                                                                                                                                                          | <b>Days of the week backwards</b>           | any error                                  |                      |    |

1  
2  
3  
4  
5  
6  
7  
8  
9  
10  
11  
12  
13  
14  
15  
16  
17  
18  
19  
20  
21  
22  
23  
24  
25  
26  
27  
28  
29  
30  
31  
32  
33  
34  
35  
36  
37  
38  
39  
40  
41  
42  
43  
44  
45  
46  
47  
48  
49  
50  
51  
52  
53  
54  
55  
56  
57  
58  
59  
60

|                                                                                                                                                                                                                                              |                                                                                                                                                                                                                                                                                                                                                                                                                                                                                                                                                                                                                                                                                                       |                                     |                     |                                     |           |                             |           |  |  |
|----------------------------------------------------------------------------------------------------------------------------------------------------------------------------------------------------------------------------------------------|-------------------------------------------------------------------------------------------------------------------------------------------------------------------------------------------------------------------------------------------------------------------------------------------------------------------------------------------------------------------------------------------------------------------------------------------------------------------------------------------------------------------------------------------------------------------------------------------------------------------------------------------------------------------------------------------------------|-------------------------------------|---------------------|-------------------------------------|-----------|-----------------------------|-----------|--|--|
|                                                                                                                                                                                                                                              | <table border="1"> <tr> <td data-bbox="689 197 986 340"><b>Months of the year backwards</b></td> <td data-bbox="986 197 1251 340">unable to pass June</td> </tr> <tr> <td data-bbox="689 340 986 483"><b>Count backwards from 20 to 1</b></td> <td data-bbox="986 340 1251 483">any error</td> </tr> <tr> <td data-bbox="689 483 986 564"><b>Digit span backwards</b></td> <td data-bbox="986 483 1251 564">&lt;5 digits</td> </tr> </table>                                                                                                                                                                                                                                                          | <b>Months of the year backwards</b> | unable to pass June | <b>Count backwards from 20 to 1</b> | any error | <b>Digit span backwards</b> | <5 digits |  |  |
| <b>Months of the year backwards</b>                                                                                                                                                                                                          | unable to pass June                                                                                                                                                                                                                                                                                                                                                                                                                                                                                                                                                                                                                                                                                   |                                     |                     |                                     |           |                             |           |  |  |
| <b>Count backwards from 20 to 1</b>                                                                                                                                                                                                          | any error                                                                                                                                                                                                                                                                                                                                                                                                                                                                                                                                                                                                                                                                                             |                                     |                     |                                     |           |                             |           |  |  |
| <b>Digit span backwards</b>                                                                                                                                                                                                                  | <5 digits                                                                                                                                                                                                                                                                                                                                                                                                                                                                                                                                                                                                                                                                                             |                                     |                     |                                     |           |                             |           |  |  |
| <p>B. The disturbance develops over a <b>short period of time</b> (usually hours to a few days), represents a <b>change</b> from baseline attention and awareness, and tends to <b>fluctuate</b> in severity during the course of a day.</p> | <p><u>Observation (by the examiner during the interview):</u></p> <p>Distractibility. Comprehension. Tendency to lose the tread of conversation</p> <p>Level of arousal measured using RASS and OSLA</p> <p>Acute onset and/or fluctuation obtained from informant history from nursing staff and clinical notes</p> <p><u>Questions to carer/ nursing staff or derived from clinical notes:</u></p> <p>Has there been a sudden change in the patient’s mental state?</p> <p>Does the patient seem to be better at any period in the day compared to other times?</p> <p>Has the level of consciousness been altered (drowsy/ not interacting or agitated)?</p> <p>Sleep-wake cycle disturbances?</p> |                                     |                     |                                     |           |                             |           |  |  |



|                                                                                                                                                                                                                                                 |                                                                                                                                                                                                                                                                                                                                                                                                                                                                               |  |  |
|-------------------------------------------------------------------------------------------------------------------------------------------------------------------------------------------------------------------------------------------------|-------------------------------------------------------------------------------------------------------------------------------------------------------------------------------------------------------------------------------------------------------------------------------------------------------------------------------------------------------------------------------------------------------------------------------------------------------------------------------|--|--|
| <p>C. An additional disturbance in <b>cognition</b> (e.g., memory deficit, disorientation, language, visuospatial ability, or perception).</p>                                                                                                  | <p><u>Questions to the patient:</u></p> <p>Orientation to time, place and person</p> <p>3 item recall at three minutes</p> <p>Questions from CAM-ICU: Why are you in hospital? Will a stone float in water? Are there fish in the sea?</p> <p><u>Questions to carer/ nursing staff or derived from clinical notes:</u></p> <p>Any evidence of perceptual disturbances as illusions or hallucinations? Memory disturbances? Psychotic symptoms? Psychomotor abnormalities?</p> |  |  |
| <p>D. The disturbances in criteria A and C are <b>not explained by another preexisting, established, or evolving neurocognitive disorder</b> and do not occur in the context of a severely reduced level of arousal, such as coma.</p>          | <p>Information from history/chart/clinical assessment</p>                                                                                                                                                                                                                                                                                                                                                                                                                     |  |  |
| <p>E. There is evidence from the history, physical examination, or laboratory findings that the disturbance is a direct <b>physiologic consequence</b> of another medical condition, substance intoxication or withdrawal (i.e., because of</p> | <p>By virtue of the surgery, all participants are considered to fulfil this criterion.</p>                                                                                                                                                                                                                                                                                                                                                                                    |  |  |

|                                                                                                   |                                                                                                                                                                                                                  |  |  |
|---------------------------------------------------------------------------------------------------|------------------------------------------------------------------------------------------------------------------------------------------------------------------------------------------------------------------|--|--|
| a drug of abuse or to a medication), or exposure to a toxin or is because of multiple etiologies. |                                                                                                                                                                                                                  |  |  |
| <b>Delirium</b> based on the tests and information above?                                         | All DSM-5 criteria fulfilled                                                                                                                                                                                     |  |  |
| <b>Subsyndromal delirium</b> based on the tests and information above?                            | Defined as evidence of change, in addition to any one of these: (a) altered arousal, (b) attentional deficits, (c) other cognitive change, (d) delusions or hallucinations.<br><br>Criteria D and E must be met. |  |  |

304 DSM-5, Diagnostic and Statistical Manual of Mental Disorders, 5th edition; RASS, Richmond Agitation

305 Sedation Scale; OSLA, Observational Scale of Level of Arousal; CAM-ICU, Confusion Assessment

306 Method for Intensive Care Units

307

### 308 **Secondary endpoints**

309 Secondary endpoints include the composite endpoint of coma, delirium or death, in addition to  
 310 number of delirium days, delirium severity and motor activity patterns, comparison to inclusion of  
 311 serum concentrations of neurofilament light (NFL) and p-tau181 1, 3 and 5 days postoperatively, as  
 312 well as change from inclusion to 1 and 6 months after the operation in different cognitive tests,  
 313 patient rated health status, frailty status, and comparison of change in frailty status. In explorative  
 314 analyses, the secondary outcomes will also be assessed between patients with or without  
 315 postoperative delirium. We will also assess if preoperative frailty status modifies the effect of  
 316 dexmedetomidine and clonidine treatment, by studying the interaction between preoperative frailty  
 317 and treatment on delirium and the other mentioned endpoints.

1  
2  
3 318 All endpoints will be assessed using Norwegian versions of validated instruments: Delirium severity  
4  
5 319 will be measured using CAM-ICU-7,<sup>51</sup> OSLA<sup>48</sup> and RASS;<sup>47</sup> motor activity patterns using body worn  
6  
7 320 accelerometers; cognitive function using Montreal Cognitive Assessment (MoCA),<sup>52</sup> immediate and  
8  
9 321 delayed recall from The Ten Words Memory Task from The Consortium to Establish a Registry for  
10  
11 322 Alzheimer's Disease,<sup>53</sup> Trail Making Test (TMT) version A and B,<sup>54</sup> semantic and phonemic verbal  
12  
13 323 fluency,<sup>55</sup> digit span forwards and backwards (by Wechsler Adult Intelligence Scale);<sup>56</sup> frailty will be  
14  
15 324 measured by a comprehensive geriatric assessment (including medical history, number of prescribed  
16  
17 325 drugs, sensory impairment, activity of daily living, gait speed, handgrip strength, chair stand and  
18  
19 326 nutritional status) calculating a frailty-index (range, 0-1; higher values indicate greater frailty) based  
20  
21 327 on the accumulation of deficits model of frailty<sup>57 58</sup> and by the shorter Essential Frailty Toolset;<sup>59</sup> and  
22  
23 328 patient rated health status using the EQ-5D-5L questionnaire.<sup>44</sup>

24  
25  
26  
27  
28 329 For assessment of cognitive trajectories, the same cognitive tests will be performed in a stable phase  
29  
30 330 preoperatively as well as after 1 and 6 months. Information regarding functional status will be  
31  
32 331 obtained from the patient preoperatively and from either the patient or their proxy at follow-up,  
33  
34 332 depending on the patient's ability to provide detailed information.

35  
36  
37  
38 333 For a sub-sample of one hundred patients from the Trondheim cohort, motor activity will be  
39  
40 334 measured by 3D accelerometer inertial sensors (AX3 sensors) (Axivity Ltd., Newcastle, UK) sampled at  
41  
42 335 100 Hz and processed using custom made software. Accelerometers will be attached to the frontal  
43  
44 336 part of the waist, the dominant thigh (ventrally, midthigh), and on the dominant wrist pre surgery.  
45  
46 337 Motor activity patterns will be monitored continuously (day and nights) before and the five first days  
47  
48 338 after surgery or until discharge from hospital, and over one week after 1 and 6 months. Sensor data  
49  
50 339 will be analyzed regarding both quantity and quality of movements and compared with the clinical  
51  
52 340 delirium assessments.

53  
54  
55  
56  
57 341 **Biomarkers**  
58  
59  
60

1  
2  
3 342 In addition to routine blood tests, blood will be taken in the morning for specific study analyses  
4  
5 343 (serum, plasma and wholeblood) before surgery, and at postoperative day 1, 3 and 5 (or earlier if  
6  
7 344 discharged before day 5) and frozen at  $-80^{\circ}\text{C}$  locally. Frozen samples will then be shipped to the  
8  
9 345 coordinating centre (Oslo) to be stored in a biobank at  $-80^{\circ}\text{C}$  for future analyses. The stored blood  
10  
11 346 samples will be analysed for promising markers such as NFL already known to be associated with  
12  
13 347 delirium,<sup>609</sup> p-tau181 associated with dementia and delirium,<sup>61-63</sup> and possibly other biomarkers of  
14  
15 348 neuronal degeneration, neuroinflammation and neurotransmitters,<sup>64-68</sup> using state-of-the-art  
16  
17 349 ultrasensitive assays to evaluate their association with observed clinical responses to the study drugs.  
18  
19  
20  
21

### 22 350 **Standardised training**

23  
24  
25 351 The research assistants across all sites will receive standardized training for all study measures prior  
26  
27 352 to study initiation, including cognitive tests, delirium assessments and measurements of frailty  
28  
29 353 indicators. Retraining will be provided as necessary. Detailed instructions and operation manuals in  
30  
31 354 Norwegian language, including an instruction video for the MoCA, will be made available to all  
32  
33 355 assessors.  
34  
35

### 36 356 **Data management and monitoring**

37  
38  
39  
40 357 Participant data will be collected by authorized trained personnel, be recorded on electronic Case  
41  
42 358 Report Forms (CRF) and stored on a password protected database. Paper files will be stored in locked  
43  
44 359 cabinets accessible to team members only. Study monitors will perform ongoing source data  
45  
46 360 verification to confirm that data entered into the CRFs are accurate, complete, and verifiable from  
47  
48 361 source documents; that the safety and rights of participants are being protected; and that the study  
49  
50 362 is being conducted in accordance with the currently approved protocol, International Conference on  
51  
52 363 Harmonization Good Clinical Practice, and all applicable regulatory requirements. Records and  
53  
54 364 documents, including signed Informed Consent Forms, pertaining to the conduct of this study will be  
55  
56 365 retained by the investigators for 15 years after study completion.  
57  
58  
59  
60

1  
2  
3 367 **Safety and adverse events management**  
4  
5

6 368 Immediate safety concerns will be handled by the treating anaesthesiologist, who will determine if  
7  
8 369 the participant should continue or discontinue study intervention. If the patient is hemodynamically  
9  
10 370 unstable at any time during infusion of the study medication or difficult to wake up after surgery, the  
11  
12 371 infusion can be temporarily stopped, as decided by the treating physician. In such a case the patient  
13  
14 372 will continue in the study. The reason for temporary discontinuation will be recorded. Since patients  
15  
16 373 are closely monitored in the perioperative phase of cardiac surgery, potential adverse circulatory  
17  
18 374 effects will be rapidly revealed and corrected;

- 21  
22  
23 375 • Temporal epicardial pacing wires are placed routinely during cardiac surgery, and  
24  
25 376 bradycardia will be treated with atropine and/or pacemaker as per routine.  
26  
27 377 • Hypotension will be treated at discretion of the treating anaesthesiologists, who are  
28  
29 378 permitted to reduce dose of the study drug as necessary to preserve haemodynamic stability,  
30  
31 379 following guidelines and local routines. A Mean Arterial Pressure (MAP) >55-60mmHg is  
32  
33 380 recommended.  
34  
35 381 • If not rapid and satisfactory response on other measures is achieved, the treating  
36  
37 382 anaesthesiologist will consider to turn off the infusion/unblind the study.

38  
39  
40  
41 383 Planned time points for safety assessments are provided in table 2.  
42

43  
44 384 The following safety indicators will be compared between the three treatment groups with  
45  
46 385 appropriate statistical methods: Highest and lowest heart rate and mean arterial blood pressure,  
47  
48 386 oxygen saturation, number of units for blood transfusion, volume of postoperative blood loss, use of  
49  
50 387 pressor substances, use of rescue medication, number of episodes of bradycardia, hypotension or  
51  
52 388 hypoxemia in need of intervention, perioperative myocardial infarction and stroke, postoperative  
53  
54 389 serum concentrations of troponin and Pro B-type Natriuretic Peptide (proBNP), mortality.  
55  
56  
57  
58  
59  
60

1  
2  
3 390 An independent Data Monitoring Committee will have unblinded access to all data and meet at pre-  
4  
5 391 planned inclusion milestones and whenever the members find it necessary.<sup>69</sup> Meetings are pre-  
6  
7 392 planned after inclusion of 20, 50, 100 and 400 participants, to assess safety indicators and to advise  
8  
9 393 on continuation or termination of the study. All safety data collected will be summarized and  
10  
11 394 reviewed by the DMC for agreement of next steps. In particular, data will be reviewed by for  
12  
13 395 identification of the following events that would potentially contribute to a requirement to pause or  
14  
15 396 stop the study: Any deaths, regardless of causality; cerebral infarctions; haemodynamic variables  
16  
17 397 (time during surgery with MAP<50 mmHg, highest/lowest MAP and HR, lowest SpO<sub>2</sub>); need for  
18  
19 398 vasopressor, non-invasive ventilation, active pacing, respiratory support or extracorporeal  
20  
21 399 membrane oxygenation (ECMO); postoperative troponin values. If a pausing/stopping rule is met, a  
22  
23 400 decision will be made, based on the review, as to whether enrolment in the study will be allowed to  
24  
25 401 resume. Case unblinding will be performed for above reviews if necessary.  
26  
27  
28  
29  
30  
31  
32  
33

#### 34 403 **Current sample size justification**

35  
36  
37 404 The proportion of patients experiencing postoperative delirium after open heart surgery for all ages  
38  
39 405 has been reported to be 24%,<sup>3</sup> and higher in older adults.<sup>4</sup> Since the lower age limit in our trial is 70  
40  
41 406 years, we estimate that the proportion in the control group will be at least 30%. The most recent  
42  
43 407 meta-analysis of the effect of dexmedetomidine estimates the delirium risk to be reduced to  
44  
45 408 approximately half of the untreated group (*i.e.*, 15%).<sup>25</sup> We anticipate that the effect of clonidine  
46  
47 409 may be weaker, but still clinically relevant. We have thus powered the study based on an estimated  
48  
49 410 delirium incidence of 20% in the clonidine group. An initial, conservative sample size calculation  
50  
51 411 based on comparison of two proportions indicated that a sample size of 290 in each group (870  
52  
53 412 altogether) will give a power of 80% with a significance level of 5% to detect such a difference  
54  
55 413 between the clonidine and the placebo group in the proportion developing delirium within 7 days  
56  
57 414 postoperatively. To account for dropouts, we aim at including 900 patients. This sample size  
58  
59  
60

1  
2  
3 415 calculation approach was conservative considering the use of time-to-delirium analysis strategy,  
4  
5 416 accommodating for both a higher drop-out rate and that this trial has three-arms. We have further  
6  
7 417 confirmed the adequacy of this sample size estimate for the logrank test with differing rates of drop-  
8  
9 418 out and considering the three-arms (Supplementary file 1).  
10  
11  
12

### 13 419 **Statistical analysis**

14  
15  
16 420 The primary analysis population will be the intention-to-treat population, and all tests will be two-  
17  
18 421 sided. The primary objective in this study is to prevent postoperative delirium. The primary endpoint  
19  
20 422 is the cumulative incidence of postoperative delirium. In the analysis of this endpoint, time to  
21  
22 423 diagnosis of delirium will be used to account for the varying postoperative observation time due to  
23  
24 424 difference in time to discharge or transfer to other hospitals will be different. The cumulative  
25  
26 425 incidence will therefore be estimated using the Kaplan Meier estimator with time to first delirium as  
27  
28 426 the dependent variable and compare time to event curves between treatments by the logrank test.  
29  
30 427 Patients who are discharged from the university hospital during the observation period or reach the  
31  
32 428 end of the observation period (7 days) without having developed delirium, are regarded as censored.  
33  
34 429 We consider that treatment group allocation will not influence the risk of being censored. Those who  
35  
36 430 die prior to 7 days, will also be regarded as censored in the primary analysis, but we will carry out a  
37  
38 431 secondary analysis with the combined endpoint *death or delirium*. The same approach will be applied  
39  
40 432 for those who are comatose, and thus impossible to evaluate for delirium. Additional analyses may  
41  
42 433 also include estimating the incidence of delirium treating deaths as a competing risk by the Fine and  
43  
44 434 Gray method.  
45  
46  
47  
48  
49

50 435 All analyses will be adjusted for study centre which was used to as a stratification variable in the  
51  
52 436 randomisation process.  
53  
54

55 437 Sensitivity analyses will be carried out by estimating hazard ratios using Cox' proportional hazards  
56  
57 438 model to adjust for potential imbalance of prognostic factors between treatment groups.  
58  
59  
60

1  
2  
3 439 Secondary endpoints as the cumulative incidence of death, coma or postoperative delirium will be  
4  
5 440 analysed using the Kaplan Meier estimator and the logrank test as above. Additional analyses by Cox'  
6  
7 441 proportional hazards model may also be performed. Mean duration of delirium; severity of delirium;  
8  
9 442 combination of duration and severity of delirium; cognitive tests after 1 and 6 months; EQ-5D-5L  
10  
11 443 scores after 1 and 6 months; and postoperative plasma concentrations of NFL and p-tau181 will be  
12  
13 444 compared between treatments with appropriate regression models which will be defined in a  
14  
15 445 Statistical Analysis Plan prior to analysis.

16  
17  
18  
19 446 Frailty as risk factor for delirium and for adverse effects of the study medication, will be analysed by  
20  
21 447 linear or logistic regression (as appropriate), adjusted for other known risk factors. The association  
22  
23 448 between frailty and delirium will be analysed by adding frailty as a covariate in a Cox'proportional  
24  
25 449 hazards model on time to delirium (as above). Additionally, we will assess if the presence of frailty  
26  
27 450 modifies the effect of the treatment by including an interaction term between frailty and treatment  
28  
29 451 allocation in the Cox proportional hazards model. The association between frailty and occurrence of  
30  
31 452 adverse events (AE) will be estimated by logistic regression models including covariates as above.

32  
33  
34  
35  
36 453 No interim analyses of the efficacy of the treatments are planned. A detailed statistical analysis plan  
37  
38 454 will be finalized prior to unblinding.

#### 41 455 **Ethics and dissemination**

42  
43  
44 456 This trial is approved by the Regional Committee for Ethics in Medical Research in Norway (South-  
45  
46 457 East Norway) and by the Norwegian Medicines Agency, and will be conducted in accordance with  
47  
48 458 consensus ethical principles derived from international guidelines including the Declaration of  
49  
50 459 Helsinki. The results of this study will be published in peer-reviewed medical journals, as well as  
51  
52 460 presented at scientific meetings

#### 53 54 55 56 461 **Discussion**



1  
2  
3 462 To our knowledge, ALPHA2PREVENT will be the first large randomised controlled multicentre trial to  
4  
5 463 study the prophylactic efficacy of dexmedetomidine as well as clonidine on the incidence of  
6  
7 464 postoperative delirium in older cardiac surgical patients, and also including long-term cognitive  
8  
9 465 trajectories.

11  
12  
13 466 One should expect that treatment options that can prevent delirium in a short-term perspective,  
14  
15 467 would also improve the long-term cognitive prognosis. Evidence for such an effect is slowly emerging  
16  
17 468 for non-pharmacological interventions,<sup>70</sup> but is lacking regarding drug treatment.

19  
20 469 Published studies of dexmedetomidine for prevention of delirium in ICU vary largely with respect to  
21  
22 470 dosing regimens, from 0.1<sup>71 72</sup> to 1.4 µg/kg/h.<sup>33</sup> Many of the authors also administered an initial  
23  
24 471 bolus. In the cardiac surgery context, Turan et al started dexmedetomidine infusion already before  
25  
26 472 start of CPB, gave 0.4 µg/kg/h postoperatively,<sup>34</sup> and found more side effects in the actively treated  
27  
28 473 than in the placebo group. We have chosen a careful dosage of 0.4 µg/kg/h peroperatively and 0.2  
29  
30 474 µg/kg/h postoperatively, with no bolus, to reduce the risk of AE, but not so low that we cannot  
31  
32 475 expect an effect on delirium.

33  
34  
35  
36  
37 476 Regarding clonidine, the recommended dosage varies greatly between sources, but is mainly in the  
38  
39 477 range 1-1.5 µg/kg/h.<sup>73</sup> We will dose the drug considerably lower, to avoid side effects. There is a  
40  
41 478 shortage of studies comparing i.v. dexmedetomidine and i.v. clonidine in ICU or postoperative  
42  
43 479 settings.<sup>74</sup> To our knowledge, a widely agreed evidence-based i.v. dosage regimen has not been  
44  
45 480 developed for i.v. clonidine. A study by Grest in critically ill patients after cardiac surgery<sup>74</sup> and a  
46  
47 481 recent meta-analysis favour equipotency mg per mg.<sup>75</sup> Thus, our choice is fairly pragmatic, but the  
48  
49 482 doses are similar to that currently used in many ICUs as part of routine practice.

50  
51  
52  
53 483 To further reduce the risk of hemodynamic instability due to the combination of anaesthesiological  
54  
55 484 procedures and study drug at the start of surgery, we will postpone infusion of study drug until the  
56  
57 485 CPB is established. If clonidine is both effective and safe to administer, then it may be relevant to  
58  
59 486 conduct more studies on per oral treatment with clonidine in other patient groups later on.

1  
2  
3 487 Strengths of this trial are the prospective and randomised placebo controlled design, the use of two  
4  
5 488 relevant and much used drugs, inclusion of a high number of patients from multiple sites, adequate  
6  
7 489 statistic strength, repeated cognitive and frailty assessments, use of body-worn accelerometers, and  
8  
9  
10 490 repeated samples of biomarkers. The analyses of biomarkers reflecting neural injury will give us  
11  
12 491 increased understanding of the pathophysiological mechanisms of delirium. Inclusion of preoperative  
13  
14 492 frailty assessments will provide evidence for frailty as a predictive marker of treatment effect and  
15  
16 493 allow for interaction analyses. The use of body-worn accelerometers will provide insight into motor  
17  
18 494 activity patterns in subtypes of delirium.

20  
21  
22 495 This trial has, however, some limitations to consider. The exclusion criteria might limit the  
23  
24 496 generalisability of our findings to other patient populations. If the incidence of delirium in the  
25  
26 497 placebo group is lower than expected, or if the anticipated effect of the treatment is smaller, the  
27  
28 498 study may be underpowered. The dose of the active drugs might be too low or the duration of  
29  
30 499 treatment be too short in order to show effects. As many patients live far away from the study site,  
31  
32  
33 500 there is a potential for missing long-term data.

34  
35  
36 501 Should the treatment have a positive effect, it would have important beneficial implications for  
37  
38 502 patients, carers and society, such as alleviating acute patient distress and carer burden. If this  
39  
40 503 treatment could reduce longer-term negative effects of delirium, it might have significant  
41  
42 504 consequences for financial and human resource use in health care.

43  
44  
45  
46 505

## 47 48 49 506 **DECLARATIONS**

50  
51  
52 507 **Patient and public involvement:** Panellists from the user panel established by the Norwegian  
53  
54 508 National Advisory Unit on Ageing and Health, participate in the Trial Advisory Board. They have  
55  
56 509 experience as relatives to patients with dementia or delirium, have given valuable input to the  
57  
58 510 project plans and will follow up during the project period.

1  
2  
3 511 **Ethics approval:** The trial is approved by the Regional Committee for Ethics in Medical Research in  
4  
5 512 Norway (South-east Norway) (REK 262384), June 9th 2021, and by the Norwegian Medicines Agency  
6  
7 513 June 17<sup>th</sup> 2021.  
8  
9

10 514 **Availability of data and materials:** Materials can be available upon reasonable request to the  
11  
12 515 corresponding author. However, availability is dependent on approval from the Regional Ethics  
13  
14 516 Committee and the local data protection officer.  
15  
16  
17

18 517 **Competing interest:** HZ has served at scientific advisory boards and/or as a consultant for Alector,  
19  
20 518 Eisai, Denali, Roche Diagnostics, Wave, Samumed, Siemens Healthineers, Pinteon Therapeutics,  
21  
22 519 Nervgen, AZTherapies, CogRx and Red Abbey Labs, has given lectures in symposia sponsored by  
23  
24 520 Cellectricon, Fujirebio, Alzecure and Biogen, and is a co-founder of Brain Biomarker Solutions in  
25  
26 521 Gothenburg AB (BBS), which is a part of the GU Ventures Incubator Program (outside submitted  
27  
28 522 work).  
29  
30  
31

32 523 AJCS is advisor for Prolira, a start-up company that develops an EEG-based delirium monitor. Any  
33  
34 524 (future) profits from EEG-based delirium monitoring will be used for future scientific research only.  
35  
36  
37

38 525 GS has participated in one advisory meeting for Biogen. HMN has received lecture fees from Vifor  
39  
40 526 Pharma and Orion Pharma.  
41  
42

43 527 The other authors declare that they have no competing interests.  
44  
45

46 528 **Consent for publication:** Not required  
47  
48

49 529 **Funding:** The trial is funded by KLINBEFORSK, The National Programme for Clinical Therapy Research  
50  
51 530 in the Specialist Health Service in Norway, grant number 2020204. HZ is a Wallenberg Scholar.  
52  
53

54 531 **Disclaimer:** Funders have no role in the trial design, data collection, management, analysis, writing of  
55  
56 532 the manuscript or decision to publish.  
57  
58

59 533 **Author contributions:**  
60

1  
2  
3 534 Drafting of the manuscript: BEN  
4  
5

6 535 Critical revision of the manuscript for important intellectual content: BEN, RB, RH, JLH, AKK, SAL, IM,  
7

8 536 HMN, JR, GS, ES, NKS, ES, AS, ØSS, TT, AW, HZ, TBW, MRS  
9

10  
11 537 Obtained funding: TBW  
12  
13

14 538 All authors contributed to the writing of the manuscript and approved the final version.  
15  
16

17 539 **Acknowledgements:** The trial is investigator-initiated and investigator-led, and is conducted  
18

19 540 independently of the pharmaceutical industry. We are thankful to the staff of the participating  
20

21 541 departments for their compliance with the project directives and their caring for the patients.  
22  
23  
24

25 542  
26  
27

28 543 **Abbreviations:**  
29  
30

| Abbreviation       | Explanation                                                                                                                                     |
|--------------------|-------------------------------------------------------------------------------------------------------------------------------------------------|
| AE                 | Adverse Event                                                                                                                                   |
| ALPHA2PREVENT      | Alpha-2-adrenergic receptor agonists for the prevention of delirium and cognitive decline after open heart surgery: randomised controlled trial |
| ASA classification | American Society of Anesthesiologists Physical Status Classification                                                                            |
| CABG               | Coronary Artery Bypass Grafting                                                                                                                 |
| CAM-ICU            | Confusion Assessment Method for Intensive Care Units                                                                                            |
| CPB                | Cardiopulmonary Bypass                                                                                                                          |
| CRF                | Case Report Form                                                                                                                                |
| DSM-5              | Diagnostic and Statistical Manual of Mental Disorders, 5th edition                                                                              |
| ECG                | Electrocardiogram                                                                                                                               |
| EQ-5D-5L           | EuroQol 5 Dimension 5 Level                                                                                                                     |

|        |                                         |
|--------|-----------------------------------------|
| FI     | Frailty Index                           |
| GFR    | Glomerular Filtration Rate              |
| ICU    | Intensive Care Unit                     |
| MAP    | Mean Arterial Pressure                  |
| MoCA   | Montreal Cognitive Assessment           |
| NFL    | Neurofilament light                     |
| NRS    | Numerical Rating Scale                  |
| OSLA   | Observational Scale of Level of Arousal |
| ProBNP | Pro B-type Natriuretic Peptide          |
| PROM   | Patient Rated Outcome Measure           |
| RASS   | Richmond Agitation Sedation Scale       |
| RCT    | Randomised Controlled Trial             |
| SAE    | Serious Adverse Event                   |
| TMT    | Trail Making Test                       |

544

545

1  
2  
3  
4  
5  
6  
7  
8  
9  
10  
11  
12  
13  
14  
15  
16  
17  
18  
19  
20  
21  
22  
23  
24  
25  
26  
27  
28  
29  
30  
31  
32  
33  
34  
35  
36  
37  
38  
39  
40  
41  
42  
43  
44  
45  
46  
47  
48  
49  
50  
51  
52  
53  
54  
55  
56  
57  
58  
59  
60

546 **LEGENDS**

547 **Figure 1:**

548 Study schema. MoCA, Montreal Cognitive Assessment; TMT, Trail Making Test; EQ-5D-5L, EuroQol 5

549 Dimension 5 Level; POD, Postoperative Day

550

For peer review only

551 **REFERENCES**

- 552 1. Marcantonio ER. Delirium in Hospitalized Older Adults. *The New England journal of medicine*  
553 2017;377(15):1456-66. doi: 10.1056/NEJMcp1605501 [published Online First: 2017/10/12]
- 554 2. Wilson JE, Mart MF, Cunningham C, et al. Delirium. *Nat Rev Dis Primers* 2020;6(1):90. doi:  
555 10.1038/s41572-020-00223-4
- 556 3. Greaves D, Psaltis PJ, Ross TJ, et al. Cognitive outcomes following coronary artery bypass grafting:  
557 A systematic review and meta-analysis of 91,829 patients. *International journal of cardiology*  
558 2019;289:43-49. doi: 10.1016/j.ijcard.2019.04.065 [published Online First: 2019/05/13]
- 559 4. Eide LS, Ranhoff AH, Fridlund B, et al. Comparison of frequency, risk factors, and time course of  
560 postoperative delirium in octogenarians after transcatheter aortic valve implantation versus  
561 surgical aortic valve replacement. *The American journal of cardiology* 2015;115(6):802-9. doi:  
562 10.1016/j.amjcard.2014.12.043 [published Online First: 2015/02/04]
- 563 5. Hollinger A, Siegemund M, Goettel N, et al. Postoperative Delirium in Cardiac Surgery: An  
564 Unavoidable Menace? *Journal of cardiothoracic and vascular anesthesia* 2015;29(6):1677-87.  
565 doi: 10.1053/j.jvca.2014.08.021 [published Online First: 2015/10/13]
- 566 6. Abrahamov D, Levran O, Naparstek S, et al. Blood-Brain Barrier Disruption After Cardiopulmonary  
567 Bypass: Diagnosis and Correlation to Cognition. *The Annals of thoracic surgery*  
568 2017;104(1):161-69. doi: 10.1016/j.athoracsur.2016.10.043
- 569 7. Gleason LJ, Schmitt EM, Kosar CM, et al. Effect of Delirium and Other Major Complications on  
570 Outcomes After Elective Surgery in Older Adults. *JAMA Surg* 2015;150(12):1134-40. doi:  
571 10.1001/jamasurg.2015.2606
- 572 8. Witlox J, Eurelings LS, de Jonghe JF, et al. Delirium in elderly patients and the risk of postdischarge  
573 mortality, institutionalization, and dementia: a meta-analysis. *JAMA* 2010;304(4):443-51. doi:  
574 304/4/443 [pii];10.1001/jama.2010.1013 [doi]
- 575 9. Krogseth M, Wyller TB, Engedal K, et al. Delirium is a risk factor for institutionalization and  
576 functional decline in older hip fracture patients. *Journal of psychosomatic research*

- 1  
2  
3 577 2014;76(1):68-74. doi: 10.1016/j.jpsychores.2013.10.006 [published Online First:  
4  
5 578 2013/12/24]  
6  
7 579 10. Pezzullo L, Streatfeild J, Hickson J, et al. Economic impact of delirium in Australia: a cost of illness  
8  
9 580 study. *BMJ Open* 2019;9(9):e027514. doi: 10.1136/bmjopen-2018-027514 [published Online  
10  
11 581 First: 2019/09/19]  
12  
13  
14 582 11. Instenes I, Gjengedal E, Eide LSP, et al. "Eight Days of Nightmares ... " - Octogenarian Patients'  
15  
16 583 Experiences of Postoperative Delirium after Transcatheter or Surgical Aortic Valve  
17  
18 584 Replacement. *Heart, lung & circulation* 2018;27(2):260-66. doi: 10.1016/j.hlc.2017.02.012  
19  
20 585 [published Online First: 2017/04/12]  
21  
22  
23 586 12. Gottesman RF, Grega MA, Bailey MM, et al. Delirium after coronary artery bypass graft surgery  
24  
25 587 and late mortality. *Annals of neurology* 2010;67(3):338-44. doi: 10.1002/ana.21899  
26  
27 588 [published Online First: 2010/04/08]  
28  
29  
30 589 13. Davis DH, Muniz-Terrera G, Keage HA, et al. Association of Delirium With Cognitive Decline in Late  
31  
32 590 Life: A Neuropathologic Study of 3 Population-Based Cohort Studies. *JAMA Psychiatry* 2017  
33  
34 591 doi: 10.1001/jamapsychiatry.2016.3423 [published Online First: 2017/01/24]  
35  
36  
37 592 14. Saczynski JS, Marcantonio ER, Quach L, et al. Cognitive trajectories after postoperative delirium.  
38  
39 593 *The New England journal of medicine* 2012;367(1):30-9. doi: 10.1056/NEJMoa1112923  
40  
41 594 [published Online First: 2012/07/06]  
42  
43  
44 595 15. Persico I, Cesari M, Morandi A, et al. Frailty and Delirium in Older Adults: A Systematic Review  
45  
46 596 and Meta-Analysis of the Literature. *Journal of the American Geriatrics Society*  
47  
48 597 2018;66(10):2022-30. doi: 10.1111/jgs.15503 [published Online First: 2018/09/22]  
49  
50 598 16. van Beek-Peeters J, van Noort EHM, Faes MC, et al. Shared decision making in older patients with  
51  
52 599 symptomatic severe aortic stenosis: a systematic review. *Heart* 2020;106(9):647-55. doi:  
53  
54 600 10.1136/heartjnl-2019-316055 [published Online First: 2020/02/01]  
55  
56  
57 601 17. Clegg A, Young J, Iliffe S, et al. Frailty in elderly people. *Lancet* 2013;381(9868):752-62. doi:  
58  
59 602 S0140-6736(12)62167-9 [pii];10.1016/S0140-6736(12)62167-9 [doi]  
60



- 1  
2  
3 603 18. Guidet B, de Lange DW, Boumendil A, et al. The contribution of frailty, cognition, activity of daily  
4  
5 604 life and comorbidities on outcome in acutely admitted patients over 80 years in European  
6  
7 605 ICUs: the VIP2 study. *Intensive care medicine* 2020;46(1):57-69. doi: 10.1007/s00134-019-  
8  
9 606 05853-1  
10  
11  
12 607 19. Meagher DJ, Leonard M, Donnelly S, et al. A longitudinal study of motor subtypes in delirium:  
13  
14 608 frequency and stability during episodes. *JPsychosomRes* 2012;72(3):236-41. doi: S0022-  
15  
16 609 3999(11)00298-4 [pii];10.1016/j.jpsychores.2011.11.013 [doi]  
17  
18  
19 610 20. Godfrey A, Leonard M, Donnelly S, et al. Validating a new clinical subtyping scheme for delirium  
20  
21 611 with electronic motion analysis. *Psychiatry research* 2010;178(1):186-90. doi:  
22  
23 612 10.1016/j.psychres.2009.04.010 [published Online First: 2010/05/11]  
24  
25  
26 613 21. Evensen S, Bourke AK, Lydersen S, et al. Motor activity across delirium motor subtypes in geriatric  
27  
28 614 patients assessed using body-worn sensors: a Norwegian cross-sectional study. *BMJ Open*  
29  
30 615 2019;9(2):e026401. doi: 10.1136/bmjopen-2018-026401 [published Online First:  
31  
32 616 2019/03/04]  
33  
34  
35 617 22. Harbo EF, Fuglerud SS, Skjaervold NK. Visualisation of limb movements by accelerometers in  
36  
37 618 sedated patients. *Crit Care* 2020;24(1):283. doi: 10.1186/s13054-020-02975-7 [published  
38  
39 619 Online First: 2020/06/05]  
40  
41  
42 620 23. Needham MJ, Webb CE, Bryden DC. Postoperative cognitive dysfunction and dementia: what we  
43  
44 621 need to know and do. *British journal of anaesthesia* 2017;119(suppl\_1):i115-i25. doi:  
45  
46 622 10.1093/bja/aex354 [published Online First: 2017/11/22]  
47  
48  
49 623 24. Siddiqi N, Harrison JK, Clegg A, et al. Interventions for preventing delirium in hospitalised non-ICU  
50  
51 624 patients. *The Cochrane database of systematic reviews* 2016;3:CD005563. doi:  
52  
53 625 10.1002/14651858.CD005563.pub3 [published Online First: 2016/03/12]  
54  
55  
56 626 25. Flukiger J, Hollinger A, Speich B, et al. Dexmedetomidine in prevention and treatment of  
57  
58 627 postoperative and intensive care unit delirium: a systematic review and meta-analysis.  
59  
60

- 1  
2  
3 628 *Annals of intensive care* 2018;8(1):92. doi: 10.1186/s13613-018-0437-z [published Online  
4  
5 629 First: 2018/09/22]  
6  
7 630 26. Bajwa S, Kulshrestha A. Dexmedetomidine: An Adjuvant Making Large Inroads into Clinical  
8  
9 631 Practice. *Annals of medical and health sciences research* 2013;3(4):475-83. doi:  
10 632 10.4103/2141-9248.122044 [published Online First: 2014/01/01]  
11  
12  
13  
14 633 27. Flanders CA, Rocke AS, Edwardson SA, et al. The effect of dexmedetomidine and clonidine on the  
15  
16 634 inflammatory response in critical illness: a systematic review of animal and human studies.  
17  
18 635 *Crit Care* 2019;23(1):402. doi: 10.1186/s13054-019-2690-4 [published Online First:  
19 636 2019/12/13]  
20  
21  
22  
23 637 28. Sanders RD, Wehrman J, Irons J, et al. Meta-analysis of randomised controlled trials of  
24  
25 638 perioperative dexmedetomidine to reduce delirium and mortality after cardiac surgery.  
26  
27 639 *British journal of anaesthesia* 2021; 127(5):e168-e70. doi: 10.1016/j.bja.2021.08.009  
28  
29  
30 640 29. Li CJ, Wang BJ, Mu DL, et al. Randomized clinical trial of intraoperative dexmedetomidine to  
31  
32 641 prevent delirium in the elderly undergoing major non-cardiac surgery. *The British journal of*  
33  
34 642 *surgery* 2020;107(2):e123-e32. doi: 10.1002/bjs.11354 [published Online First: 2020/01/07]  
35  
36  
37 643 30. Likhvantsev VV, Landoni G, Grebenchikov OA, et al. Perioperative Dexmedetomidine Supplement  
38  
39 644 Decreases Delirium Incidence After Adult Cardiac Surgery: A Randomized, Double-Blind,  
40  
41 645 Controlled Study. *Journal of cardiothoracic and vascular anesthesia* 2020 doi:  
42  
43 646 10.1053/j.jvca.2020.02.035 [published Online First: 2020/04/09]  
44  
45  
46 647 31. van Norden J, Spies CD, Borchers F, et al. The effect of peri-operative dexmedetomidine on the  
47  
48 648 incidence of postoperative delirium in cardiac and non-cardiac surgical patients: a  
49  
50 649 randomised, double-blind placebo-controlled trial. *Anaesthesia* 2021 doi:  
51  
52 650 10.1111/anae.15469 [published Online First: 2021/05/08]  
53  
54  
55 651 32. Peng K, Shen YP, Ying YY, et al. Perioperative dexmedetomidine and 5-year survival in patients  
56  
57 652 undergoing cardiac surgery. *British journal of anaesthesia* 2021 doi:  
58  
59 653 10.1016/j.bja.2021.03.040 [published Online First: 2021/06/05]  
60

- 1  
2  
3 654 33. Subramaniam B, Shankar P, Shaefi S, et al. Effect of Intravenous Acetaminophen vs Placebo  
4  
5 655 Combined With Propofol or Dexmedetomidine on Postoperative Delirium Among Older  
6  
7 656 Patients Following Cardiac Surgery: The DEXACET Randomized Clinical Trial. *JAMA*  
8  
9 657 2019;321(7):686-96. doi: 10.1001/jama.2019.0234 [published Online First: 2019/02/20]  
10  
11  
12 658 34. Turan A, Duncan A, Leung S, et al. Dexmedetomidine for reduction of atrial fibrillation and  
13  
14 659 delirium after cardiac surgery (DECADE): a randomised placebo-controlled trial. *Lancet*  
15  
16 660 2020;396(10245):177-85. doi: 10.1016/S0140-6736(20)30631-0 [published Online First:  
17  
18 661 2020/07/20]  
19  
20  
21 662 35. Li P, Li LX, Zhao ZZ, et al. Dexmedetomidine reduces the incidence of postoperative delirium after  
22  
23 663 cardiac surgery: a meta-analysis of randomized controlled trials. *BMC anesthesiology*  
24  
25 664 2021;21(1):153. doi: 10.1186/s12871-021-01370-1 [published Online First: 2021/05/20]  
26  
27  
28 665 36. Pichot C, Ghignone M, Quintin L. Dexmedetomidine and clonidine: from second- to first-line  
29  
30 666 sedative agents in the critical care setting? *Journal of intensive care medicine* 2012;27(4):219-  
31  
32 667 37. doi: 10.1177/0885066610396815 [published Online First: 2011/04/29]  
33  
34  
35 668 37. Khan ZP, Ferguson CN, Jones RM. alpha-2 and imidazoline receptor agonists. Their pharmacology  
36  
37 669 and therapeutic role. *Anaesthesia* 1999;54(2):146-65.  
38  
39 670 38. Wang JG, Belley-Cote E, Burry L, et al. Clonidine for sedation in the critically ill: a systematic  
40  
41 671 review and meta-analysis. *Crit Care* 2017;21(1):75. doi: 10.1186/s13054-017-1610-8  
42  
43 672 [published Online First: 2017/03/24]  
44  
45  
46 673 39. Rubino AS, Onorati F, Caroleo S, et al. Impact of clonidine administration on delirium and related  
47  
48 674 respiratory weaning after surgical correction of acute type-A aortic dissection: results of a  
49  
50 675 pilot study. *InteractCardiovascThoracSurg* 2010;10(1):58-62. doi: icvts.2009.217562  
51  
52 676 [pii];10.1510/icvts.2009.217562 [doi]  
53  
54  
55 677 40. Shokri H, Ali I. A randomized control trial comparing prophylactic dexmedetomidine versus  
56  
57 678 clonidine on rates and duration of delirium in older adult patients undergoing coronary  
58  
59  
60

- 1  
2  
3 679 artery bypass grafting. *Journal of clinical anesthesia* 2020;61:109622. doi:  
4  
5 680 10.1016/j.jclinane.2019.09.016 [published Online First: 2019/11/02]  
6  
7 681 41. American Psychiatric Association. Diagnostic and Statistical Manual of Mental Disorders: DSM-5  
8  
9 682 (5th ed.). Washington DC: American Psychiatric Association 2013.  
10  
11 683 42. Cole MG, Ciampi A, Belzile E, et al. Subsyndromal delirium in older people: a systematic review of  
12  
13 684 frequency, risk factors, course and outcomes. *Int J Geriatr Psychiatry* 2013;28(8):771-80. doi:  
14  
15 685 10.1002/gps.3891  
16  
17 686 43. Collet JP, Thiele H, Barbato E, et al. 2020 ESC Guidelines for the management of acute coronary  
18  
19 687 syndromes in patients presenting without persistent ST-segment elevation. *European heart*  
20  
21 688 *journal* 2021;42(14):1289-367. doi: 10.1093/eurheartj/ehaa575 [published Online First:  
22  
23 689 2020/08/30]  
24  
25 690 44. EuroQol G. EuroQol--a new facility for the measurement of health-related quality of life. *Health*  
26  
27 691 *policy (Amsterdam, Netherlands)* 1990;16(3):199-208. doi: 10.1016/0168-8510(90)90421-9  
28  
29 692 [published Online First: 1990/11/05]  
30  
31 693 45. Neerland BE, Hov KR, Bruun Wyller V, et al. The protocol of the Oslo Study of Clonidine in Elderly  
32  
33 694 Patients with Delirium; LUCID: a randomised placebo-controlled trial. *BMC geriatrics*  
34  
35 695 2015;15(1):7. doi: 10.1186/s12877-015-0006-3 [published Online First: 2015/04/19]  
36  
37 696 46. Oh ES, Akeju O, Avidan MS, et al. A roadmap to advance delirium research: Recommendations  
38  
39 697 from the NIDUS Scientific Think Tank. *Alzheimer's & dementia : the journal of the Alzheimer's*  
40  
41 698 *Association* 2020;16(5):726-33. doi: 10.1002/alz.12076 [published Online First: 2020/04/16]  
42  
43 699 47. Sessler CN, Gosnell MS, Grap MJ, et al. The Richmond Agitation-Sedation Scale: validity and  
44  
45 700 reliability in adult intensive care unit patients. *Am J Respir Crit Care Med* 2002;166(10):1338-  
46  
47 701 44. doi: 10.1164/rccm.2107138 [doi];166/10/1338 [pii]  
48  
49 702 48. Tiegies Z, McGrath A, Hall RJ, et al. Abnormal level of arousal as a predictor of delirium and  
50  
51 703 inattention: an exploratory study. *The American journal of geriatric psychiatry : official*  
52  
53  
54  
55  
56  
57  
58  
59  
60

- 1  
2  
3 704 *journal of the American Association for Geriatric Psychiatry* 2013;21(12):1244-53. doi:  
4  
5 705 10.1016/j.jagp.2013.05.003  
6  
7 706 49. Hall RJ, Meagher DJ, Maclullich AM. Delirium detection and monitoring outside the ICU.  
8  
9 707 *BestPractResClinAnaesthesiol* 2012;26(3):367-83. doi: S1521-6896(12)00035-3  
10  
11 708 [pii];10.1016/j.bpa.2012.07.002 [doi]  
12  
13  
14 709 50. Ely EW, Inouye SK, Bernard GR, et al. Delirium in mechanically ventilated patients: validity and  
15  
16 710 reliability of the confusion assessment method for the intensive care unit (CAM-ICU). *JAMA*  
17  
18 711 2001;286(21):2703-10. doi: 10.1001/jama.286.21.2703 [published Online First: 2001/12/26]  
19  
20  
21 712 51. Khan BA, Perkins AJ, Gao S, et al. The Confusion Assessment Method for the ICU-7 Delirium  
22  
23 713 Severity Scale: A Novel Delirium Severity Instrument for Use in the ICU. *Crit Care Med*  
24  
25 714 2017;45(5):851-57. doi: 10.1097/CCM.0000000000002368  
26  
27  
28 715 52. Nasreddine ZS, Phillips NA, Bedirian V, et al. The Montreal Cognitive Assessment, MoCA: a brief  
29  
30 716 screening tool for mild cognitive impairment. *Journal of the American Geriatrics Society*  
31  
32 717 2005;53(4):695-9. doi: 10.1111/j.1532-5415.2005.53221.x [published Online First:  
33  
34 718 2005/04/09]  
35  
36  
37 719 53. Morris JC, Heyman A, Mohs RC, et al. The Consortium to Establish a Registry for Alzheimer's  
38  
39 720 Disease (CERAD). Part I. Clinical and neuropsychological assessment of Alzheimer's disease.  
40  
41 721 *Neurology* 1989;39(9):1159-65. [published Online First: 1989/09/01]  
42  
43  
44 722 54. Tombaugh TN. Trail Making Test A and B: normative data stratified by age and education.  
45  
46 723 *Archives of clinical neuropsychology : the official journal of the National Academy of*  
47  
48 724 *Neuropsychologists* 2004;19(2):203-14. doi: 10.1016/S0887-6177(03)00039-8 [published  
49  
50 725 Online First: 2004/03/11]  
51  
52  
53 726 55. Tombaugh TN, Kozak J, Rees L. Normative data stratified by age and education for two measures  
54  
55 727 of verbal fluency: FAS and animal naming. *Archives of clinical neuropsychology : the official*  
56  
57 728 *journal of the National Academy of Neuropsychologists* 1999;14(2):167-77. [published Online  
58  
59 729 First: 2003/11/01]  
60

- 1  
2  
3 730 56. Wechsler D NH, Nordvik H. Wais-III Wechsler Adult Intelligence Scale : manual. 3. Ed. Stockholm:  
4  
5 731 Psykologiförlaget 2003.  
6  
7 732 57. Searle SD, Mitnitski A, Gahbauer EA, et al. A standard procedure for creating a frailty index. *BMC*  
8  
9 733 *geriatrics* 2008;8:24. doi: 10.1186/1471-2318-8-24 [published Online First: 2008/10/02]  
10  
11  
12 734 58. Kim DH, Afilalo J, Shi SM, et al. Evaluation of Changes in Functional Status in the Year After Aortic  
13  
14 735 Valve Replacement. *JAMA Intern Med* 2019;179(3):383-91. doi:  
15  
16 736 10.1001/jamainternmed.2018.6738 [published Online First: 2019/02/05]  
17  
18  
19 737 59. Afilalo J, Lauck S, Kim DH, et al. Frailty in Older Adults Undergoing Aortic Valve Replacement: The  
20  
21 738 FRAILITY-AVR Study. *J Am Coll Cardiol* 2017;70(6):689-700. doi: 10.1016/j.jacc.2017.06.024  
22  
23 739 [published Online First: 2017/07/12]  
24  
25 740 60. Halaas NB, Blennow K, Idland AV, et al. Neurofilament Light in Serum and Cerebrospinal Fluid of  
26  
27 741 Hip Fracture Patients with Delirium. *Dementia and geriatric cognitive disorders* 2018;46(5-  
28  
29 742 6):346-57. doi: 10.1159/000494754 [published Online First: 2018/12/07]  
30  
31  
32 743 61. Karikari TK, Pascoal TA, Ashton NJ, et al. Blood phosphorylated tau 181 as a biomarker for  
33  
34 744 Alzheimer's disease: a diagnostic performance and prediction modelling study using data  
35  
36 745 from four prospective cohorts. *The Lancet Neurology* 2020;19(5):422-33. doi: 10.1016/S1474-  
37  
38 746 4422(20)30071-5 [published Online First: 2020/04/26]  
39  
40  
41 747 62. Ballweg T, White M, Parker M, et al. Association between plasma tau and postoperative delirium  
42  
43 748 incidence and severity: a prospective observational study. *British journal of anaesthesia*  
44  
45 749 2021;126(2):458-66. doi: 10.1016/j.bja.2020.08.061 [published Online First: 2020/11/25]  
46  
47  
48 750 63. Yu L, Wen G, Zhu S, et al. Abnormal phosphorylation of tau protein and neuroinflammation  
49  
50 751 induced by laparotomy in an animal model of postoperative delirium. *Experimental brain*  
51  
52 752 *research* 2021 doi: 10.1007/s00221-020-06007-2 [published Online First: 2021/01/08]  
53  
54  
55 753 64. Sajjad MU, Blennow K, Knapskog AB, et al. Cerebrospinal Fluid Levels of Interleukin-8 in Delirium,  
56  
57 754 Dementia, and Cognitively Healthy Patients. *Journal of Alzheimer's disease : JAD*  
58  
59 755 2020;73(4):1363-72. doi: 10.3233/JAD-190941 [published Online First: 2020/01/14]  
60

- 1  
2  
3 756 65. Hov KR, Bolstad N, Idland AV, et al. Cerebrospinal Fluid S100B and Alzheimer's Disease  
4  
5 757 Biomarkers in Hip Fracture Patients with Delirium. *Dementia and geriatric cognitive disorders*  
6  
7 758 *extra* 2017;7(3):374-85. doi: 10.1159/000481853 [published Online First: 2017/12/29]  
9  
10 759 66. Neerland BE, Hall RJ, Seljeflot I, et al. Associations Between Delirium and Preoperative  
11  
12 760 Cerebrospinal Fluid C-Reactive Protein, Interleukin-6, and Interleukin-6 Receptor in  
13  
14 761 Individuals with Acute Hip Fracture. *Journal of the American Geriatrics Society*  
15  
16 762 2016;64(7):1456-63. doi: 10.1111/jgs.14238 [published Online First: 2016/06/25]  
17  
18 763 67. Balaganapathy P, Baik SH, Mallilankaraman K, et al. Interplay between Notch and p53 promotes  
19  
20 764 neuronal cell death in ischemic stroke. *Journal of cerebral blood flow and metabolism :*  
21  
22 765 *official journal of the International Society of Cerebral Blood Flow and Metabolism*  
23  
24 766 2018;38(10):1781-95. doi: 10.1177/0271678X17715956  
25  
26 767 68. Wedervang-Resell K, Ueland T, Aukrust P, et al. Reduced levels of circulating adhesion molecules  
27  
28 768 in adolescents with early-onset psychosis. *NPJ Schizophr* 2020;6(1):20. doi: 10.1038/s41537-  
29  
30 769 020-00112-5  
31  
32 770 69. Fleming TR, DeMets DL, Roe MT, et al. Data monitoring committees: Promoting best practices to  
33  
34 771 address emerging challenges. *Clin Trials* 2017;14(2):115-23. doi: 10.1177/1740774516688915  
35  
36 772 70. Wang YY, Yue JR, Xie DM, et al. Effect of the Tailored, Family-Involved Hospital Elder Life Program  
37  
38 773 on Postoperative Delirium and Function in Older Adults A Randomized Clinical Trial. *Jama*  
39  
40 774 *Internal Medicine* 2020;180(1):17-25. doi: 10.1001/jamainternmed.2019.4446  
41  
42 775 71. Su X, Meng ZT, Wu XH, et al. Dexmedetomidine for prevention of delirium in elderly patients after  
43  
44 776 non-cardiac surgery: a randomised, double-blind, placebo-controlled trial. *Lancet* 2016 doi:  
45  
46 777 10.1016/S0140-6736(16)30580-3  
47  
48 778 72. Shehabi Y, Grant P, Wolfenden H, et al. Prevalence of delirium with dexmedetomidine compared  
49  
50 779 with morphine based therapy after cardiac surgery: a randomized controlled trial  
51  
52 780 (DEXmedetomidine COmpared to Morphine-DEXCOM Study). *Anesthesiology*  
53  
54 781 2009;111(5):1075-84. doi: 10.1097/ALN.0b013e3181b6a783 [doi]  
55  
56  
57  
58  
59  
60

- 1  
2  
3 782 73. Jamadarkhana S, Gopal S. Clonidine in adults as a sedative agent in the intensive care unit.  
4  
5 783 *Journal of anaesthesiology, clinical pharmacology* 2010;26(4):439-45. [published Online First:  
6  
7 784 2011/05/07]  
8  
9  
10 785 74. Grest A, Kurmann J, Muller M, et al. Cardiovascular Safety of Clonidine and Dexmedetomidine in  
11  
12 786 Critically Ill Patients after Cardiac Surgery. *Crit Care Res Pract* 2020;2020:4750615. doi:  
13  
14 787 10.1155/2020/4750615 [published Online First: 2020/05/27]  
15  
16  
17 788 75. Wang N, Wang Z, Song X, et al. Intravenous dexmedetomidine versus intravenous clonidine for  
18  
19 789 post spinal anesthesia shivering: a meta-analysis of randomized controlled trials. *Scottish*  
20  
21 790 *medical journal* 2020;65(3):94-102. doi: 10.1177/0036933020936283 [published Online First:  
22  
23 791 2020/06/24]  
24  
25  
26  
27  
28  
29  
30  
31  
32  
33  
34  
35  
36  
37  
38  
39  
40  
41  
42  
43  
44  
45  
46  
47  
48  
49  
50  
51  
52  
53  
54  
55  
56  
57  
58  
59  
60



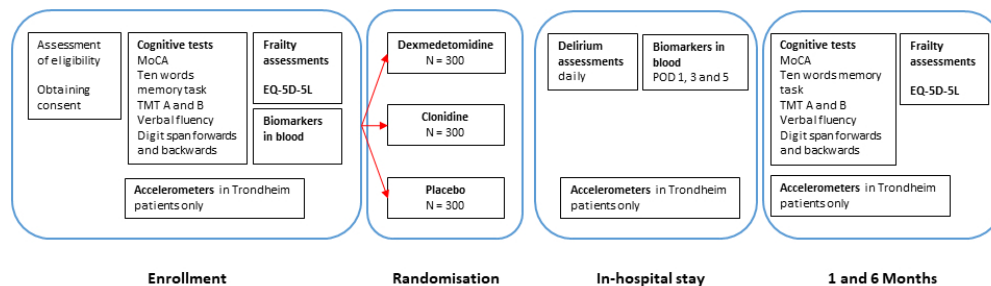

Figure 1:  
Study schema. MoCA, Montreal Cognitive Assessment; TMT, Trail Making Test; EQ-5D-5L, EuroQol 5 Dimension 5 Level; POD, Postoperative Day

254x190mm (96 x 96 DPI)

# Supplementary File 1

## Detailed explanation of sample size calculations

The following parameters were considered in the samples size calculation strategy and confirmations:

| Parameter                    | Explanation / justification     |                                                                                                                                                                                                                                                                                |
|------------------------------|---------------------------------|--------------------------------------------------------------------------------------------------------------------------------------------------------------------------------------------------------------------------------------------------------------------------------|
| <b>Proportions</b>           | <b>% delirium within 7 days</b> |                                                                                                                                                                                                                                                                                |
| Placebo                      | 30 %                            | Proportion of patients experiencing postoperative delirium after open heart surgery for all ages has been reported to be 24%, <sup>1</sup> and higher in the elderly. <sup>2</sup> With participants over 70 years in this trial, we expect the proportion to be at least 30%. |
| Dexmedetomidine (DEX)        | 15 %                            | Recent meta-analysis indicated dexmedetomidine approximately halves the risk of delirium <sup>3</sup>                                                                                                                                                                          |
| Clonidine                    | 20 %                            | Clonidine is anticipated to have similar effect to DEX, however 10 percentage point reduction would also be clinically significant                                                                                                                                             |
| <b>Power</b>                 | 80 %                            |                                                                                                                                                                                                                                                                                |
| <b>Significance level</b>    | 5 %                             |                                                                                                                                                                                                                                                                                |
| <b>Duration of follow-up</b> | 7-days                          |                                                                                                                                                                                                                                                                                |
| <b>Accrual period</b>        | 0-days*                         |                                                                                                                                                                                                                                                                                |

\*Observation period starts with operation for all participants

**Conservative sample size:** As described the initial, conservative samples size calculation based on comparison of two proportions indicated that a sample size of 290 in each group (870 altogether) will give a power of 80% with a significance level of 5% to detect such a difference between of 20 % delirium in the clonidine and 30 % in the placebo group in the proportion developing delirium within 7 days postoperatively. To account for dropouts, we aim at including 900 patients.

This sample size calculation approach was conservative considering the use of time-to-delirium analysis strategy, accommodating for a higher drop-out rate. Furthermore, the study will be more than adequately powered to find the greater expected reduction in delirium in the dexmedetomidine group.

Since we intend to use the logrank test to account for difference in the observation period, we confirmed that the calculated sample size was adequate using the more flexible calculation options in PASS Sample size software (version 20, NCSS, Kaysville, Utah, USA).

**Logrank test:** A two-sided logrank test with an overall sample size of 498 subjects (249 in the control group and 249 in the treatment group) achieves 80 % power at a 5 % significance level to a reduction in the proportion with delirium from 30 % in the control arm to 20 % in the clonidine arm (equivalent to a hazard ratio of 1.34). By including 300 participants in each group, we will still achieve

1  
2  
3 80 % power with up to 7 % drop-out rate over the first seven postoperative days. Drop out rates  
4 lower than 7 % will result in a higher power. Even with 10 % drop out rate, we will still achieve 80 %  
5 to detect a slightly larger difference between the groups (10.4 percentage point reduction, rather  
6 than 10 percentage points) (Figure S1).  
7

8  
9 **Multiplicity:** The planned comparisons for this trial are between dexmedetomidine versus  
10 placebo and clonidine versus placebo. Any comparison between dexmedetomidine and clonidine  
11 groups will be explorative and clearly stated as such. The extension of the CONSORT 2010 Statement  
12 for multi-arm parallel-group randomised trials recommend that adjustments for multiple  
13 comparisons are generally not necessary in trials comparing two or more independent treatments to  
14 placebo as we are here.<sup>4</sup> This has therefore not been factored into the sample size calculation.  
15 However, even with the very conservative Bonferroni adjustment for two comparisons a sample size  
16 of 300 participants per arm will be sufficient if there were no drop-outs and only minimally affect the  
17 difference in proportions which we can hope to identify with 80 % power if there is up to 10 % drop-  
18 out (Figure S1). For example, with 5 % dropout we can detect a 10.6 percentage point reduction in  
19 delirium cumulative incidence with 80 % and 2.5 % significance level (to account for multiplicity), or  
20 11.3 percentage points if there was 10 % dropout (Figure S1).  
21  
22  
23  
24  
25  
26  
27  
28  
29  
30  
31  
32  
33  
34  
35  
36  
37  
38  
39  
40  
41  
42  
43  
44  
45  
46  
47  
48  
49  
50  
51  
52  
53  
54  
55  
56  
57  
58  
59  
60

**Figure S1: Power depending differing drop-out rates** over the proportion with delirium in the treatment arm and where the proportion in the control arm is 30 %. The solid lines indicate the power with 5 % significance level for studies with no dropout (dark blue), 5 % dropout (pink) or 10 % dropout (medium blue). The corresponding broken lines indicate the power with 2.5 % significance level, a Bonferroni adjustment for the two planned comparisons.

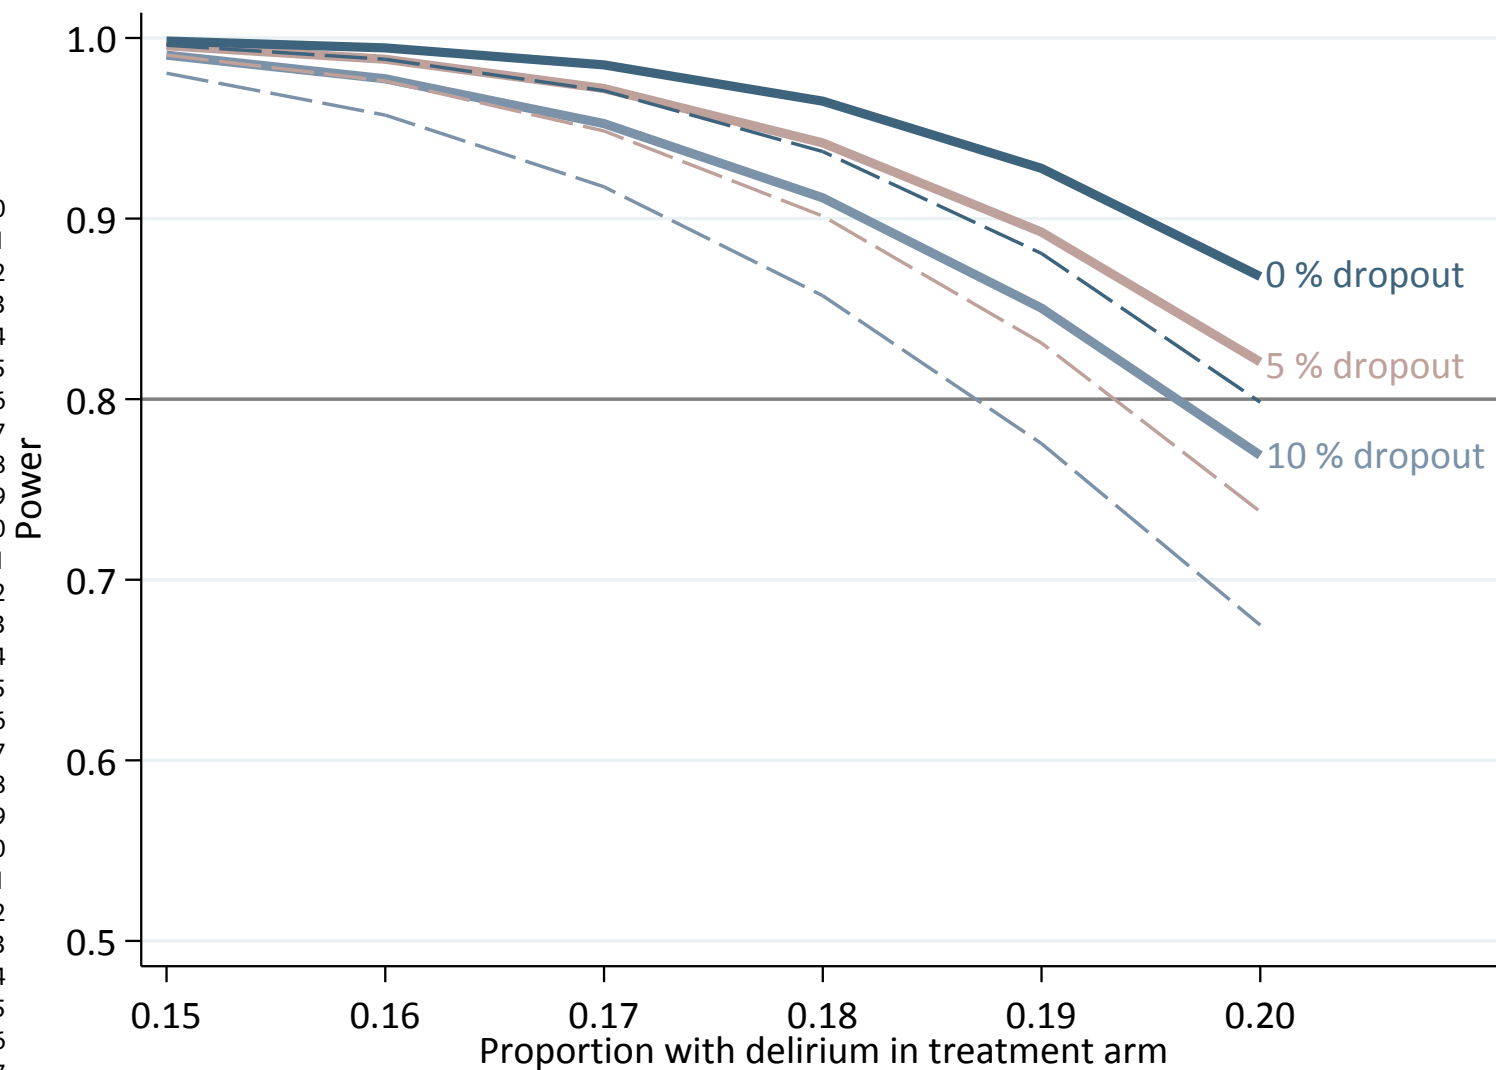

1. Greaves D, Psaltis PJ, Ross TJ, et al. Cognitive outcomes following coronary artery bypass grafting: A systematic review and meta-analysis of 91,829 patients. *International journal of cardiology* 2019;289:43-49. doi: 10.1016/j.ijcard.2019.04.065 [published Online First: 2019/05/13]
2. Eide LS, Ranhoff AH, Fridlund B, et al. Comparison of frequency, risk factors, and time course of postoperative delirium in octogenarians after transcatheter aortic valve implantation versus surgical aortic valve replacement. *The American journal of cardiology* 2015;115(6):802-9. doi: 10.1016/j.amjcard.2014.12.043 [published Online First: 2015/02/04]
3. Flukiger J, Hollinger A, Speich B, et al. Dexmedetomidine in prevention and treatment of postoperative and intensive care unit delirium: a systematic review and meta-analysis. *Annals of intensive care* 2018;8(1):92. doi: 10.1186/s13613-018-0437-z [published Online First: 2018/09/22]
4. Juszczak E, Altman DG, Hopewell S, et al. Reporting of Multi-Arm Parallel-Group Randomized Trials: Extension of the CONSORT 2010 Statement. *JAMA* 2019;321(16):1610-20. doi: 10.1001/jama.2019.3087

1  
2  
3  
4  
5  
6  
7  
8  
9  
10  
11  
12  
13  
14  
15  
16  
17  
18  
19  
20  
21  
22  
23  
24  
25  
26  
27  
28  
29  
30  
31  
32  
33  
34  
35  
36  
37  
38  
39  
40  
41  
42  
43  
44  
45  
46  
47  
48  
49  
50  
51  
52  
53  
54  
55  
56  
57  
58  
59  
60

For peer review only

# Reporting checklist for protocol of a clinical trial.

Based on the SPIRIT guidelines.

## Instructions to authors

Complete this checklist by entering the page numbers from your manuscript where readers will find each of the items listed below.

Your article may not currently address all the items on the checklist. Please modify your text to include the missing information. If you are certain that an item does not apply, please write "n/a" and provide a short explanation.

Upload your completed checklist as an extra file when you submit to a journal.

In your methods section, say that you used the SPIRIT reporting guidelines, and cite them as:

Chan A-W, Tetzlaff JM, Gøtzsche PC, Altman DG, Mann H, Berlin J, Dickersin K, Hróbjartsson A, Schulz KF, Parulekar WR, Krleža-Jerić K, Laupacis A, Moher D. SPIRIT 2013 Explanation and Elaboration: Guidance for protocols of clinical trials. *BMJ*. 2013;346:e7586

|                                   |                     |                                                                                                              | Page<br>Number |
|-----------------------------------|---------------------|--------------------------------------------------------------------------------------------------------------|----------------|
| <b>Administrative information</b> |                     |                                                                                                              |                |
| Title                             | <a href="#">#1</a>  | Descriptive title identifying the study design, population, interventions, and, if applicable, trial acronym | 1              |
| Trial registration                | <a href="#">#2a</a> | Trial identifier and registry name. If not yet registered, name of intended registry                         | 6              |
| Trial registration: data set      | <a href="#">#2b</a> | All items from the World Health Organization Trial Registration Data Set                                     | 11             |
| Protocol version                  | <a href="#">#3</a>  | Date and version identifier                                                                                  | NA             |

|    |                      |                     |                                                                               |            |
|----|----------------------|---------------------|-------------------------------------------------------------------------------|------------|
| 1  | Funding              | <a href="#">#4</a>  | Sources and types of financial, material, and other support                   | 26         |
| 2  |                      |                     |                                                                               |            |
| 3  |                      |                     |                                                                               |            |
| 4  | Roles and            | <a href="#">#5a</a> | Names, affiliations, and roles of protocol contributors                       | 1-3,26     |
| 5  | responsibilities:    |                     |                                                                               |            |
| 6  | contributorship      |                     |                                                                               |            |
| 7  |                      |                     |                                                                               |            |
| 8  |                      |                     |                                                                               |            |
| 9  |                      |                     |                                                                               |            |
| 10 | Roles and            | <a href="#">#5b</a> | Name and contact information for the trial sponsor                            | 25-26      |
| 11 | responsibilities:    |                     |                                                                               |            |
| 12 | sponsor contact      |                     |                                                                               |            |
| 13 | information          |                     |                                                                               |            |
| 14 |                      |                     |                                                                               |            |
| 15 |                      |                     |                                                                               |            |
| 16 |                      |                     |                                                                               |            |
| 17 |                      |                     |                                                                               |            |
| 18 | Roles and            | <a href="#">#5c</a> | Role of study sponsor and funders, if any, in study design; collection,       | 26         |
| 19 | responsibilities:    |                     | management, analysis, and interpretation of data; writing of the report;      |            |
| 20 | sponsor and funder   |                     | and the decision to submit the report for publication, including whether      |            |
| 21 |                      |                     | they will have ultimate authority over any of these activities                |            |
| 22 |                      |                     |                                                                               |            |
| 23 |                      |                     |                                                                               |            |
| 24 |                      |                     |                                                                               |            |
| 25 |                      |                     |                                                                               |            |
| 26 |                      |                     |                                                                               |            |
| 27 | Roles and            | <a href="#">#5d</a> | Composition, roles, and responsibilities of the coordinating centre,          | 19-21      |
| 28 | responsibilities:    |                     | steering committee, endpoint adjudication committee, data management          |            |
| 29 | committees           |                     | team, and other individuals or groups overseeing the trial, if applicable     |            |
| 30 |                      |                     | (see Item 21a for data monitoring committee)                                  |            |
| 31 |                      |                     |                                                                               |            |
| 32 |                      |                     |                                                                               |            |
| 33 |                      |                     |                                                                               |            |
| 34 |                      |                     |                                                                               |            |
| 35 | <b>Introduction</b>  |                     |                                                                               |            |
| 36 |                      |                     |                                                                               |            |
| 37 |                      |                     |                                                                               |            |
| 38 | Background and       | <a href="#">#6a</a> | Description of research question and justification for undertaking the trial, | 8-10,16,23 |
| 39 | rationale            |                     | including summary of relevant studies (published and unpublished)             |            |
| 40 |                      |                     | examining benefits and harms for each intervention                            |            |
| 41 |                      |                     |                                                                               |            |
| 42 |                      |                     |                                                                               |            |
| 43 |                      |                     |                                                                               |            |
| 44 |                      |                     |                                                                               |            |
| 45 | Background and       | <a href="#">#6b</a> | Explanation for choice of comparators                                         | 11         |
| 46 | rationale: choice of |                     |                                                                               |            |
| 47 | comparators          |                     |                                                                               |            |
| 48 |                      |                     |                                                                               |            |
| 49 |                      |                     |                                                                               |            |
| 50 |                      |                     |                                                                               |            |
| 51 | Objectives           | <a href="#">#7</a>  | Specific objectives or hypotheses                                             | 10         |
| 52 |                      |                     |                                                                               |            |
| 53 |                      |                     |                                                                               |            |
| 54 | Trial design         | <a href="#">#8</a>  | Description of trial design including type of trial (eg, parallel group,      | 11         |
| 55 |                      |                     | crossover, factorial, single group), allocation ratio, and framework (eg,     |            |
| 56 |                      |                     | superiority, equivalence, non-inferiority, exploratory)                       |            |
| 57 |                      |                     |                                                                               |            |
| 58 |                      |                     |                                                                               |            |
| 59 |                      |                     |                                                                               |            |
| 60 |                      |                     |                                                                               |            |

1 **Methods: Participants,**  
 2  
 3 **interventions, and**  
 4  
 5 **outcomes**

|    |                      |                      |                                                                                                                                                                                                                                                                                                                                                                                |           |
|----|----------------------|----------------------|--------------------------------------------------------------------------------------------------------------------------------------------------------------------------------------------------------------------------------------------------------------------------------------------------------------------------------------------------------------------------------|-----------|
| 6  |                      |                      |                                                                                                                                                                                                                                                                                                                                                                                |           |
| 7  |                      |                      |                                                                                                                                                                                                                                                                                                                                                                                |           |
| 8  | Study setting        | <a href="#">#9</a>   | Description of study settings (eg, community clinic, academic hospital) and list of countries where data will be collected. Reference to where list of study sites can be obtained                                                                                                                                                                                             | 11        |
| 9  |                      |                      |                                                                                                                                                                                                                                                                                                                                                                                |           |
| 10 |                      |                      |                                                                                                                                                                                                                                                                                                                                                                                |           |
| 11 |                      |                      |                                                                                                                                                                                                                                                                                                                                                                                |           |
| 12 |                      |                      |                                                                                                                                                                                                                                                                                                                                                                                |           |
| 13 |                      |                      |                                                                                                                                                                                                                                                                                                                                                                                |           |
| 14 | Eligibility criteria | <a href="#">#10</a>  | Inclusion and exclusion criteria for participants. If applicable, eligibility criteria for study centres and individuals who will perform the interventions (eg, surgeons, psychotherapists)                                                                                                                                                                                   | 11-13     |
| 15 |                      |                      |                                                                                                                                                                                                                                                                                                                                                                                |           |
| 16 |                      |                      |                                                                                                                                                                                                                                                                                                                                                                                |           |
| 17 |                      |                      |                                                                                                                                                                                                                                                                                                                                                                                |           |
| 18 |                      |                      |                                                                                                                                                                                                                                                                                                                                                                                |           |
| 19 |                      |                      |                                                                                                                                                                                                                                                                                                                                                                                |           |
| 20 |                      |                      |                                                                                                                                                                                                                                                                                                                                                                                |           |
| 21 | Interventions:       | <a href="#">#11a</a> | Interventions for each group with sufficient detail to allow replication, including how and when they will be administered                                                                                                                                                                                                                                                     | 16        |
| 22 | description          |                      |                                                                                                                                                                                                                                                                                                                                                                                |           |
| 23 |                      |                      |                                                                                                                                                                                                                                                                                                                                                                                |           |
| 24 |                      |                      |                                                                                                                                                                                                                                                                                                                                                                                |           |
| 25 | Interventions:       | <a href="#">#11b</a> | Criteria for discontinuing or modifying allocated interventions for a given trial participant (eg, drug dose change in response to harms, participant request, or improving / worsening disease)                                                                                                                                                                               | 16, 20-21 |
| 26 | modifications        |                      |                                                                                                                                                                                                                                                                                                                                                                                |           |
| 27 |                      |                      |                                                                                                                                                                                                                                                                                                                                                                                |           |
| 28 |                      |                      |                                                                                                                                                                                                                                                                                                                                                                                |           |
| 29 |                      |                      |                                                                                                                                                                                                                                                                                                                                                                                |           |
| 30 |                      |                      |                                                                                                                                                                                                                                                                                                                                                                                |           |
| 31 |                      |                      |                                                                                                                                                                                                                                                                                                                                                                                |           |
| 32 | Interventions:       | <a href="#">#11c</a> | Strategies to improve adherence to intervention protocols, and any procedures for monitoring adherence (eg, drug tablet return; laboratory tests)                                                                                                                                                                                                                              | 21        |
| 33 | adherence            |                      |                                                                                                                                                                                                                                                                                                                                                                                |           |
| 34 |                      |                      |                                                                                                                                                                                                                                                                                                                                                                                |           |
| 35 |                      |                      |                                                                                                                                                                                                                                                                                                                                                                                |           |
| 36 |                      |                      |                                                                                                                                                                                                                                                                                                                                                                                |           |
| 37 |                      |                      |                                                                                                                                                                                                                                                                                                                                                                                |           |
| 38 | Interventions:       | <a href="#">#11d</a> | Relevant concomitant care and interventions that are permitted or prohibited during the trial                                                                                                                                                                                                                                                                                  | 16        |
| 39 | concomitant care     |                      |                                                                                                                                                                                                                                                                                                                                                                                |           |
| 40 |                      |                      |                                                                                                                                                                                                                                                                                                                                                                                |           |
| 41 |                      |                      |                                                                                                                                                                                                                                                                                                                                                                                |           |
| 42 |                      |                      |                                                                                                                                                                                                                                                                                                                                                                                |           |
| 43 | Outcomes             | <a href="#">#12</a>  | Primary, secondary, and other outcomes, including the specific measurement variable (eg, systolic blood pressure), analysis metric (eg, change from baseline, final value, time to event), method of aggregation (eg, median, proportion), and time point for each outcome. Explanation of the clinical relevance of chosen efficacy and harm outcomes is strongly recommended | 16-19     |
| 44 |                      |                      |                                                                                                                                                                                                                                                                                                                                                                                |           |
| 45 |                      |                      |                                                                                                                                                                                                                                                                                                                                                                                |           |
| 46 |                      |                      |                                                                                                                                                                                                                                                                                                                                                                                |           |
| 47 |                      |                      |                                                                                                                                                                                                                                                                                                                                                                                |           |
| 48 |                      |                      |                                                                                                                                                                                                                                                                                                                                                                                |           |
| 49 |                      |                      |                                                                                                                                                                                                                                                                                                                                                                                |           |
| 50 |                      |                      |                                                                                                                                                                                                                                                                                                                                                                                |           |
| 51 |                      |                      |                                                                                                                                                                                                                                                                                                                                                                                |           |
| 52 |                      |                      |                                                                                                                                                                                                                                                                                                                                                                                |           |
| 53 |                      |                      |                                                                                                                                                                                                                                                                                                                                                                                |           |
| 54 |                      |                      |                                                                                                                                                                                                                                                                                                                                                                                |           |
| 55 |                      |                      |                                                                                                                                                                                                                                                                                                                                                                                |           |
| 56 |                      |                      |                                                                                                                                                                                                                                                                                                                                                                                |           |
| 57 |                      |                      |                                                                                                                                                                                                                                                                                                                                                                                |           |
| 58 |                      |                      |                                                                                                                                                                                                                                                                                                                                                                                |           |
| 59 |                      |                      |                                                                                                                                                                                                                                                                                                                                                                                |           |
| 60 |                      |                      |                                                                                                                                                                                                                                                                                                                                                                                |           |



|    |                                  |                      |                                                                                                                                                                                                                                                                                                                                                          |                                |
|----|----------------------------------|----------------------|----------------------------------------------------------------------------------------------------------------------------------------------------------------------------------------------------------------------------------------------------------------------------------------------------------------------------------------------------------|--------------------------------|
| 1  | Participant timeline             | <a href="#">#13</a>  | Time schedule of enrolment, interventions (including any run-ins and washouts), assessments, and visits for participants. A schematic diagram is highly recommended (see Figure)                                                                                                                                                                         | 11-16,<br>Table 2,<br>Figure 1 |
| 2  |                                  |                      |                                                                                                                                                                                                                                                                                                                                                          |                                |
| 3  |                                  |                      |                                                                                                                                                                                                                                                                                                                                                          |                                |
| 4  |                                  |                      |                                                                                                                                                                                                                                                                                                                                                          |                                |
| 5  |                                  |                      |                                                                                                                                                                                                                                                                                                                                                          |                                |
| 6  |                                  |                      |                                                                                                                                                                                                                                                                                                                                                          |                                |
| 7  |                                  |                      |                                                                                                                                                                                                                                                                                                                                                          |                                |
| 8  |                                  |                      |                                                                                                                                                                                                                                                                                                                                                          |                                |
| 9  |                                  |                      |                                                                                                                                                                                                                                                                                                                                                          |                                |
| 10 | Sample size                      | <a href="#">#14</a>  | Estimated number of participants needed to achieve study objectives and how it was determined, including clinical and statistical assumptions supporting any sample size calculations                                                                                                                                                                    | 21                             |
| 11 |                                  |                      |                                                                                                                                                                                                                                                                                                                                                          |                                |
| 12 |                                  |                      |                                                                                                                                                                                                                                                                                                                                                          |                                |
| 13 |                                  |                      |                                                                                                                                                                                                                                                                                                                                                          |                                |
| 14 |                                  |                      |                                                                                                                                                                                                                                                                                                                                                          |                                |
| 15 |                                  |                      |                                                                                                                                                                                                                                                                                                                                                          |                                |
| 16 |                                  |                      |                                                                                                                                                                                                                                                                                                                                                          |                                |
| 17 | Recruitment                      | <a href="#">#15</a>  | Strategies for achieving adequate participant enrolment to reach target sample size                                                                                                                                                                                                                                                                      | 11                             |
| 18 |                                  |                      |                                                                                                                                                                                                                                                                                                                                                          |                                |
| 19 |                                  |                      |                                                                                                                                                                                                                                                                                                                                                          |                                |
| 20 |                                  |                      |                                                                                                                                                                                                                                                                                                                                                          |                                |
| 21 | <b>Methods: Assignment</b>       |                      |                                                                                                                                                                                                                                                                                                                                                          |                                |
| 22 | <b>of interventions (for</b>     |                      |                                                                                                                                                                                                                                                                                                                                                          |                                |
| 23 | <b>controlled trials)</b>        |                      |                                                                                                                                                                                                                                                                                                                                                          |                                |
| 24 |                                  |                      |                                                                                                                                                                                                                                                                                                                                                          |                                |
| 25 |                                  |                      |                                                                                                                                                                                                                                                                                                                                                          |                                |
| 26 |                                  |                      |                                                                                                                                                                                                                                                                                                                                                          |                                |
| 27 |                                  |                      |                                                                                                                                                                                                                                                                                                                                                          |                                |
| 28 | Allocation: sequence generation  | <a href="#">#16a</a> | Method of generating the allocation sequence (eg, computer-generated random numbers), and list of any factors for stratification. To reduce predictability of a random sequence, details of any planned restriction (eg, blocking) should be provided in a separate document that is unavailable to those who enrol participants or assign interventions | 13                             |
| 29 |                                  |                      |                                                                                                                                                                                                                                                                                                                                                          |                                |
| 30 |                                  |                      |                                                                                                                                                                                                                                                                                                                                                          |                                |
| 31 |                                  |                      |                                                                                                                                                                                                                                                                                                                                                          |                                |
| 32 |                                  |                      |                                                                                                                                                                                                                                                                                                                                                          |                                |
| 33 |                                  |                      |                                                                                                                                                                                                                                                                                                                                                          |                                |
| 34 |                                  |                      |                                                                                                                                                                                                                                                                                                                                                          |                                |
| 35 |                                  |                      |                                                                                                                                                                                                                                                                                                                                                          |                                |
| 36 |                                  |                      |                                                                                                                                                                                                                                                                                                                                                          |                                |
| 37 |                                  |                      |                                                                                                                                                                                                                                                                                                                                                          |                                |
| 38 | Allocation concealment mechanism | <a href="#">#16b</a> | Mechanism of implementing the allocation sequence (eg, central telephone; sequentially numbered, opaque, sealed envelopes), describing any steps to conceal the sequence until interventions are assigned                                                                                                                                                | 13                             |
| 39 |                                  |                      |                                                                                                                                                                                                                                                                                                                                                          |                                |
| 40 |                                  |                      |                                                                                                                                                                                                                                                                                                                                                          |                                |
| 41 |                                  |                      |                                                                                                                                                                                                                                                                                                                                                          |                                |
| 42 |                                  |                      |                                                                                                                                                                                                                                                                                                                                                          |                                |
| 43 |                                  |                      |                                                                                                                                                                                                                                                                                                                                                          |                                |
| 44 |                                  |                      |                                                                                                                                                                                                                                                                                                                                                          |                                |
| 45 |                                  |                      |                                                                                                                                                                                                                                                                                                                                                          |                                |
| 46 | Allocation: implementation       | <a href="#">#16c</a> | Who will generate the allocation sequence, who will enrol participants, and who will assign participants to interventions                                                                                                                                                                                                                                | 11-13                          |
| 47 |                                  |                      |                                                                                                                                                                                                                                                                                                                                                          |                                |
| 48 |                                  |                      |                                                                                                                                                                                                                                                                                                                                                          |                                |
| 49 |                                  |                      |                                                                                                                                                                                                                                                                                                                                                          |                                |
| 50 |                                  |                      |                                                                                                                                                                                                                                                                                                                                                          |                                |
| 51 | Blinding (masking)               | <a href="#">#17a</a> | Who will be blinded after assignment to interventions (eg, trial participants, care providers, outcome assessors, data analysts), and how                                                                                                                                                                                                                | 13                             |
| 52 |                                  |                      |                                                                                                                                                                                                                                                                                                                                                          |                                |
| 53 |                                  |                      |                                                                                                                                                                                                                                                                                                                                                          |                                |
| 54 |                                  |                      |                                                                                                                                                                                                                                                                                                                                                          |                                |
| 55 |                                  |                      |                                                                                                                                                                                                                                                                                                                                                          |                                |
| 56 |                                  |                      |                                                                                                                                                                                                                                                                                                                                                          |                                |
| 57 |                                  |                      |                                                                                                                                                                                                                                                                                                                                                          |                                |
| 58 |                                  |                      |                                                                                                                                                                                                                                                                                                                                                          |                                |
| 59 |                                  |                      |                                                                                                                                                                                                                                                                                                                                                          |                                |
| 60 |                                  |                      |                                                                                                                                                                                                                                                                                                                                                          |                                |

|    |                        |                      |                                                                              |           |
|----|------------------------|----------------------|------------------------------------------------------------------------------|-----------|
| 1  | Blinding (masking):    | <a href="#">#17b</a> | If blinded, circumstances under which unblinding is permissible, and         | 20-21     |
| 2  |                        |                      |                                                                              |           |
| 3  | emergency unblinding   |                      | procedure for revealing a participant's allocated intervention during the    |           |
| 4  |                        |                      |                                                                              |           |
| 5  |                        |                      | trial                                                                        |           |
| 6  |                        |                      |                                                                              |           |
| 7  | <b>Methods: Data</b>   |                      |                                                                              |           |
| 8  |                        |                      |                                                                              |           |
| 9  | <b>collection,</b>     |                      |                                                                              |           |
| 10 |                        |                      |                                                                              |           |
| 11 | <b>management, and</b> |                      |                                                                              |           |
| 12 |                        |                      |                                                                              |           |
| 13 | <b>analysis</b>        |                      |                                                                              |           |
| 14 |                        |                      |                                                                              |           |
| 15 |                        |                      |                                                                              |           |
| 16 | Data collection plan   | <a href="#">#18a</a> | Plans for assessment and collection of outcome, baseline, and other trial    | 13,16-19, |
| 17 |                        |                      | data, including any related processes to promote data quality (eg,           | Table 2   |
| 18 |                        |                      | duplicate measurements, training of assessors) and a description of          |           |
| 19 |                        |                      | study instruments (eg, questionnaires, laboratory tests) along with their    |           |
| 20 |                        |                      | reliability and validity, if known. Reference to where data collection forms |           |
| 21 |                        |                      | can be found, if not in the protocol                                         |           |
| 22 |                        |                      |                                                                              |           |
| 23 |                        |                      |                                                                              |           |
| 24 |                        |                      |                                                                              |           |
| 25 |                        |                      |                                                                              |           |
| 26 |                        |                      |                                                                              |           |
| 27 |                        |                      |                                                                              |           |
| 28 | Data collection plan:  | <a href="#">#18b</a> | Plans to promote participant retention and complete follow-up, including     | 21-22     |
| 29 | retention              |                      | list of any outcome data to be collected for participants who discontinue    |           |
| 30 |                        |                      | or deviate from intervention protocols                                       |           |
| 31 |                        |                      |                                                                              |           |
| 32 |                        |                      |                                                                              |           |
| 33 |                        |                      |                                                                              |           |
| 34 |                        |                      |                                                                              |           |
| 35 | Data management        | <a href="#">#19</a>  | Plans for data entry, coding, security, and storage, including any related   | 19-20     |
| 36 |                        |                      | processes to promote data quality (eg, double data entry; range checks       |           |
| 37 |                        |                      | for data values). Reference to where details of data management              |           |
| 38 |                        |                      | procedures can be found, if not in the protocol                              |           |
| 39 |                        |                      |                                                                              |           |
| 40 |                        |                      |                                                                              |           |
| 41 |                        |                      |                                                                              |           |
| 42 |                        |                      |                                                                              |           |
| 43 | Statistics: outcomes   | <a href="#">#20a</a> | Statistical methods for analysing primary and secondary outcomes.            | 21-23     |
| 44 |                        |                      | Reference to where other details of the statistical analysis plan can be     |           |
| 45 |                        |                      | found, if not in the protocol                                                |           |
| 46 |                        |                      |                                                                              |           |
| 47 |                        |                      |                                                                              |           |
| 48 |                        |                      |                                                                              |           |
| 49 | Statistics: additional | <a href="#">#20b</a> | Methods for any additional analyses (eg, subgroup and adjusted               | 21-23     |
| 50 | analyses               |                      | analyses)                                                                    |           |
| 51 |                        |                      |                                                                              |           |
| 52 |                        |                      |                                                                              |           |
| 53 |                        |                      |                                                                              |           |
| 54 | Statistics: analysis   | <a href="#">#20c</a> | Definition of analysis population relating to protocol non-adherence (eg,    | 21-23     |
| 55 | population and         |                      | as randomised analysis), and any statistical methods to handle missing       |           |
| 56 | missing data           |                      | data (eg, multiple imputation)                                               |           |
| 57 |                        |                      |                                                                              |           |
| 58 |                        |                      |                                                                              |           |
| 59 |                        |                      |                                                                              |           |
| 60 |                        |                      |                                                                              |           |

1 **Methods: Monitoring**

2

3

4 Data monitoring: [#21a](#) Composition of data monitoring committee (DMC); summary of its role 21

5 formal committee

6 and reporting structure; statement of whether it is independent from the

7 sponsor and competing interests; and reference to where further details

8 about its charter can be found, if not in the protocol. Alternatively, an

9 explanation of why a DMC is not needed

10

11

12

13

14 Data monitoring: [#21b](#) Description of any interim analyses and stopping guidelines, including 21

15 interim analysis

16 who will have access to these interim results and make the final decision

17 to terminate the trial

18

19

20

21 Harms [#22](#) Plans for collecting, assessing, reporting, and managing solicited and 20-21

22 spontaneously reported adverse events and other unintended effects of

23 trial interventions or trial conduct

24

25

26

27 Auditing [#23](#) Frequency and procedures for auditing trial conduct, if any, and whether 21

28 the process will be independent from investigators and the sponsor

29

30

31

32 **Ethics and**

33 **dissemination**

34

35

36 Research ethics [#24](#) Plans for seeking research ethics committee / institutional review board 6,23,25

37 approval (REC / IRB) approval

38

39

40

41 Protocol amendments [#25](#) Plans for communicating important protocol modifications (eg, changes 23

42 to eligibility criteria, outcomes, analyses) to relevant parties (eg,

43 investigators, REC / IRBs, trial participants, trial registries, journals,

44 regulators)

45

46

47

48

49 Consent or assent [#26a](#) Who will obtain informed consent or assent from potential trial 11

50 participants or authorised surrogates, and how (see Item 32)

51

52

53

54 Consent or assent: [#26b](#) Additional consent provisions for collection and use of participant data 11

55 ancillary studies and biological specimens in ancillary studies, if applicable

56

57

58

59

60

|    |                          |                      |                                                                              |       |
|----|--------------------------|----------------------|------------------------------------------------------------------------------|-------|
| 1  | Confidentiality          | <a href="#">#27</a>  | How personal information about potential and enrolled participants will be   | 19,20 |
| 2  |                          |                      | collected, shared, and maintained in order to protect confidentiality        |       |
| 3  |                          |                      | before, during, and after the trial                                          |       |
| 4  |                          |                      |                                                                              |       |
| 5  |                          |                      |                                                                              |       |
| 6  |                          |                      |                                                                              |       |
| 7  | Declaration of           | <a href="#">#28</a>  | Financial and other competing interests for principal investigators for the  | 25-26 |
| 8  | interests                |                      | overall trial and each study site                                            |       |
| 9  |                          |                      |                                                                              |       |
| 10 |                          |                      |                                                                              |       |
| 11 |                          |                      |                                                                              |       |
| 12 | Data access              | <a href="#">#29</a>  | Statement of who will have access to the final trial dataset, and            | 20,25 |
| 13 |                          |                      | disclosure of contractual agreements that limit such access for              |       |
| 14 |                          |                      | investigators                                                                |       |
| 15 |                          |                      |                                                                              |       |
| 16 |                          |                      |                                                                              |       |
| 17 |                          |                      |                                                                              |       |
| 18 | Ancillary and post trial | <a href="#">#30</a>  | Provisions, if any, for ancillary and post-trial care, and for compensation  | 20-21 |
| 19 | care                     |                      | to those who suffer harm from trial participation                            |       |
| 20 |                          |                      |                                                                              |       |
| 21 |                          |                      |                                                                              |       |
| 22 |                          |                      |                                                                              |       |
| 23 | Dissemination policy:    | <a href="#">#31a</a> | Plans for investigators and sponsor to communicate trial results to          | 6,23  |
| 24 | trial results            |                      | participants, healthcare professionals, the public, and other relevant       |       |
| 25 |                          |                      | groups (eg, via publication, reporting in results databases, or other data   |       |
| 26 |                          |                      | sharing arrangements), including any publication restrictions                |       |
| 27 |                          |                      |                                                                              |       |
| 28 |                          |                      |                                                                              |       |
| 29 |                          |                      |                                                                              |       |
| 30 |                          |                      |                                                                              |       |
| 31 | Dissemination policy:    | <a href="#">#31b</a> | Authorship eligibility guidelines and any intended use of professional       | 23    |
| 32 | authorship               |                      | writers                                                                      |       |
| 33 |                          |                      |                                                                              |       |
| 34 |                          |                      |                                                                              |       |
| 35 |                          |                      |                                                                              |       |
| 36 | Dissemination policy:    | <a href="#">#31c</a> | Plans, if any, for granting public access to the full protocol, participant- | 25    |
| 37 | reproducible research    |                      | level dataset, and statistical code                                          |       |
| 38 |                          |                      |                                                                              |       |
| 39 |                          |                      |                                                                              |       |
| 40 |                          |                      |                                                                              |       |
| 41 | <b>Appendices</b>        |                      |                                                                              |       |
| 42 |                          |                      |                                                                              |       |
| 43 | Informed consent         | <a href="#">#32</a>  | Model consent form and other related documentation given to                  | 11    |
| 44 | materials                |                      | participants and authorised surrogates                                       |       |
| 45 |                          |                      |                                                                              |       |
| 46 |                          |                      |                                                                              |       |
| 47 |                          |                      |                                                                              |       |
| 48 | Biological specimens     | <a href="#">#33</a>  | Plans for collection, laboratory evaluation, and storage of biological       | 14,19 |
| 49 |                          |                      | specimens for genetic or molecular analysis in the current trial and for     |       |
| 50 |                          |                      | future use in ancillary studies, if applicable                               |       |
| 51 |                          |                      |                                                                              |       |
| 52 |                          |                      |                                                                              |       |
| 53 |                          |                      |                                                                              |       |
| 54 |                          |                      |                                                                              |       |

None The SPIRIT Explanation and Elaboration paper is distributed under the terms of the Creative Commons Attribution License CC-BY-NC. This checklist can be completed online using <https://www.goodreports.org/>, a tool made by the EQUATOR Network in collaboration with [Penelope.ai](#)

For peer review only - <http://bmjopen.bmj.com/site/about/guidelines.xhtml>

# BMJ Open

## Alpha-2-adrenergic receptor agonists for the prevention of delirium and cognitive decline after open heart surgery (ALPHA2PREVENT): protocol for a multicentre randomised controlled trial

|                               |                                                                                                                                                                                                                                                                                                                                                                                                                                                                                                                                                                                                                                                                                                                                                                                                                                                                                                                                                                                                                                                                                                                                                                                                                                                                                                                                                                                                                                                                                                                                                                                                                                                                                                                                                                                                                                                                                                                                                                                                                                                                                                                                                                       |
|-------------------------------|-----------------------------------------------------------------------------------------------------------------------------------------------------------------------------------------------------------------------------------------------------------------------------------------------------------------------------------------------------------------------------------------------------------------------------------------------------------------------------------------------------------------------------------------------------------------------------------------------------------------------------------------------------------------------------------------------------------------------------------------------------------------------------------------------------------------------------------------------------------------------------------------------------------------------------------------------------------------------------------------------------------------------------------------------------------------------------------------------------------------------------------------------------------------------------------------------------------------------------------------------------------------------------------------------------------------------------------------------------------------------------------------------------------------------------------------------------------------------------------------------------------------------------------------------------------------------------------------------------------------------------------------------------------------------------------------------------------------------------------------------------------------------------------------------------------------------------------------------------------------------------------------------------------------------------------------------------------------------------------------------------------------------------------------------------------------------------------------------------------------------------------------------------------------------|
| Journal:                      | <i>BMJ Open</i>                                                                                                                                                                                                                                                                                                                                                                                                                                                                                                                                                                                                                                                                                                                                                                                                                                                                                                                                                                                                                                                                                                                                                                                                                                                                                                                                                                                                                                                                                                                                                                                                                                                                                                                                                                                                                                                                                                                                                                                                                                                                                                                                                       |
| Manuscript ID                 | bmjopen-2021-057460.R2                                                                                                                                                                                                                                                                                                                                                                                                                                                                                                                                                                                                                                                                                                                                                                                                                                                                                                                                                                                                                                                                                                                                                                                                                                                                                                                                                                                                                                                                                                                                                                                                                                                                                                                                                                                                                                                                                                                                                                                                                                                                                                                                                |
| Article Type:                 | Protocol                                                                                                                                                                                                                                                                                                                                                                                                                                                                                                                                                                                                                                                                                                                                                                                                                                                                                                                                                                                                                                                                                                                                                                                                                                                                                                                                                                                                                                                                                                                                                                                                                                                                                                                                                                                                                                                                                                                                                                                                                                                                                                                                                              |
| Date Submitted by the Author: | 19-May-2022                                                                                                                                                                                                                                                                                                                                                                                                                                                                                                                                                                                                                                                                                                                                                                                                                                                                                                                                                                                                                                                                                                                                                                                                                                                                                                                                                                                                                                                                                                                                                                                                                                                                                                                                                                                                                                                                                                                                                                                                                                                                                                                                                           |
| Complete List of Authors:     | <p>Neerland, Bjørn; Oslo University Hospital, Department of Geriatric Medicine</p> <p>Busund, Rolf; University Hospital of North Norway, Department of Cardiothoracic and Vascular Surgery; UiT The Arctic University of Norway, Institute of Clinical Medicine</p> <p>Haaverstad, Rune; Haukeland University Hospital, Heart Disease; University of Bergen, Clinical Science</p> <p>Helbostad, Jorunn; Norwegian University of Science and Technology</p> <p>Landsverk, Svein Aslak; Oslo University Hospital, Department of Anaesthesiology</p> <p>Martinaityte, Ieva; UiT The Arctic University of Norway; University Hospital of North Norway, Department of Geriatric medicine</p> <p>Norum, Hilde Margrethe; Oslo University Hospital, Department of Anaesthesiology; Oslo University Hospital, Department of Research and Development</p> <p>Ræder, Johan ; Universitetet i Oslo Institutt for klinisk medisin, Anesthesiology</p> <p>Selbaek, Geir; Innlandet Hospital Trust, Centre for Old Age Psychiatric Research; Oslo University Hospital, Department of Geriatric Medicine</p> <p>Simpson, Melanie R.; Norwegian University of Science and Technology, Department of Public Health and Nursing</p> <p>Skaar, Elisabeth; Haukeland University Hospital, Department of Heart Disease</p> <p>Skjærvold, Nils Kristian; Norwegian University of Science and Technology, Department of Circulation and Medical Imaging; Trondheim University Hospital, Department of Anesthesia and Intensive Care Medicine</p> <p>Skovlund, Eva; Norwegian University of Science and Technology</p> <p>Slooter, Arjen ; University Medical Centre Utrecht Brain Centre; Vrije Universiteit Brussel</p> <p>Svendsen, Øyvind Sverre; Haukeland University Hospital, Department of Anesthesia and Intensive Care; University of Bergen, Department of Clinical Medicine</p> <p>Tønnessen, Theis; University of Oslo, Institute of Clinical Medicine; Oslo University Hospital, Department of Cardiothoracic Surgery</p> <p>Wahba, Alexander; Norwegian University of Science and Technology, Department of Circulation and Medical Imaging; Trondheim University Hospital</p> |

|                                 |                                                                                                                                                                                                                                                                                                                       |
|---------------------------------|-----------------------------------------------------------------------------------------------------------------------------------------------------------------------------------------------------------------------------------------------------------------------------------------------------------------------|
|                                 | Zetterberg, Henrik; University of Gothenburg Sahlgrenska Academy, Department of Psychiatry and Neurochemistry; UCL Institute of Neurology, Department of Neurodegenerative Disease<br>Wyller, Torgeir; Oslo University Hospital, Department of Geriatric Medicine; University of Oslo, Institute of Clinical Medicine |
| <b>Primary Subject Heading</b>: | Anaesthesia                                                                                                                                                                                                                                                                                                           |
| Secondary Subject Heading:      | Geriatric medicine                                                                                                                                                                                                                                                                                                    |
| Keywords:                       | Cardiac surgery < SURGERY, Delirium & cognitive disorders < PSYCHIATRY, Adult anaesthesia < ANAESTHETICS, GERIATRIC MEDICINE                                                                                                                                                                                          |
|                                 |                                                                                                                                                                                                                                                                                                                       |

SCHOLARONE™  
Manuscripts

1  
2  
3 1 **TITLE PAGE**  
4  
5

6 2 **Title:** Alpha-2-adrenergic receptor agonists for the prevention of delirium and cognitive decline after  
7  
8 3 open heart surgery (ALPHA2PREVENT): protocol for a multicentre randomised controlled trial  
9  
10

11 4  
12  
13

14 5 **Authors and affiliations:**  
15  
16

17 6 Neerland, Bjørn Erik 1  
18  
19

20 7 Busund, Rolf 2,3  
21  
22

23 8 Haaverstad, Rune 4,5  
24  
25

26 9 Helbostad, Jorunn Lægdheim 6  
27  
28

29 10 Landsverk, Svein Aslak 7  
30  
31

32 11 Martinaityte, Ieva 3,8  
33  
34

35 12 Norum, Hilde Margrethe 7, 9  
36  
37

38 13 Ræder, Johan 7,10  
39  
40

41 14 Selbæk, Geir 1, 10, 11  
42  
43

44 15 Simpson, Melanie Rae 12  
45  
46

47 16 Skaar, Elisabeth 13  
48  
49

50 17 Skjærvold, Nils Kristian 14, 15  
51  
52

53 18 Skovlund, Eva 12  
54  
55

56 19 Slooter, Arjen 16, 17  
57  
58  
59  
60

- 1  
2  
3 20 Svendsen, Øyvind Sverre 18, 19  
4  
5  
6 21 Tønnessen, Theis 10, 20  
7  
8  
9 22 Wahba, Alexander 13, 21  
10  
11  
12 23 Zetterberg, Henrik 22, 23, 24, 25, 26  
13  
14  
15 24 Wyller, Torgeir Bruun 1, 10  
16  
17  
18 25  
19  
20  
21 26 1) Oslo Delirium Research Group, Department of Geriatric Medicine, Oslo University Hospital,  
22  
23 Oslo, Norway  
24 27  
25 26 2) Department of Cardiothoracic and Vascular Surgery, University Hospital of North Norway,  
27  
28 Tromsø, Norway  
29 29  
30 30 3) Institute of Clinical Medicine, UiT The Arctic University of Norway, Tromsø, Norway.  
31  
32 31 4) Section of Cardiothoracic Surgery, Department of Heart Disease, Haukeland University  
33  
34 Hospital, Bergen, Norway  
35 32  
36 37 33 5) Institute of Clinical Science, Medical Faculty, University of Bergen, Bergen, Norway  
38  
39 34 6) Department of Neuromedicine and Movement Science, Faculty of Medicine and Health  
40  
41 Sciences, Norwegian University of Science and Technology, Trondheim, Norway  
42 35  
43 36 7) Department of Anaesthesiology, Division of Emergencies and Critical Care, Oslo University  
44  
45 Hospital, Oslo, Norway  
46 37  
47 48 38 8) Department of Geriatric medicine, University Hospital of North Norway, Tromsø, Norway  
49  
50 39 9) Department of Research and Development, Division of Emergencies and Critical Care, Oslo  
51  
52 University Hospital, Oslo, Norway  
53 40  
54 55 41 10) Institute of Clinical Medicine, University of Oslo, Oslo, Norway  
56  
57 42 11) Norwegian National Advisory Unit on Ageing and Health, Vestfold Hospital Trust, Tønsberg,  
58  
59 Norway.  
60 43



- 1  
2  
3 44 12) Department of Public Health and Nursing, Norwegian University of Science and Technology,  
4  
5 45 Trondheim, Norway  
6  
7 46 13) Department of Heart Disease, Haukeland University Hospital, Bergen, Norway  
8  
9 47 14) Department of Circulation and Medical Imaging, Norwegian University of Science and  
10  
11 48 Technology, Trondheim, Norway  
12  
13 49 15) Department of Anesthesia and Intensive Care Medicine, Trondheim University Hospital,  
14  
15 50 Trondheim, Norway  
16  
17 51 16) Department of Intensive Care Medicine and UMC Utrecht Brain Center, University Medical  
18  
19 52 Center Utrecht, Utrecht University, Utrecht, the Netherlands  
20  
21 53 17) Department of Neurology, UZ Brussel and Vrije Universiteit Brussel, Brussels, Belgium  
22  
23 54 18) Department of Anesthesia and Intensive Care, Haukeland University Hospital, Bergen,  
24  
25 55 Norway  
26  
27 56 19) Department of Clinical Medicine, University of Bergen, Bergen, Norway  
28  
29 57 20) Department of Cardiothoracic Surgery, Oslo University Hospital, Oslo, Norway  
30  
31 58 21) Clinic of Cardiothoracic Surgery, Trondheim University Hospital, Trondheim, Norway  
32  
33 59 22) Department of Psychiatry and Neurochemistry, Institute of Neuroscience and Physiology, the  
34  
35 60 Sahlgrenska Academy at the University of Gothenburg, Mölndal, Sweden  
36  
37 61 23) Clinical Neurochemistry Laboratory, Sahlgrenska University Hospital, Mölndal, Sweden  
38  
39 62 24) Department of Neurodegenerative Disease, UCL Institute of Neurology, Queen Square,  
40  
41 63 London, UK  
42  
43 64 25) UK Dementia Research Institute at UCL, London, UK  
44  
45 65 26) Hong Kong Center for Neurodegenerative Diseases, Hong Kong, China  
46  
47  
48  
49  
50  
51  
52

53 **Corresponding author:** Dr. Bjørn Erik Neerland ([bjonee@ous-hf.no](mailto:bjonee@ous-hf.no))  
54  
55

56 **Address:** Oslo Delirium Research Group, Department of Geriatric Medicine, Oslo University Hospital,  
57  
58 Pb 4950 Nydalen, 0424 Oslo, Norway  
59  
60

- 1  
2  
3 69 **Telephone:** +47 90078979  
4  
5  
6 70 **Twitter:** Bjørn Erik Neerland @beneerland  
7  
8  
9 71 **ORCID number:** 0000-0001-5335-9146  
10  
11  
12 72 **Other ORCID numbers:**  
13  
14  
15 73 Rune Haaverstad: 0000-0002-3242-7602  
16  
17  
18 74 Jorunn L Helbostad: 0000-0003-0214-9290  
19  
20  
21 75 Svein Aslak Landsverk: 0000-0002-93445708  
22  
23  
24 76 Ieva Martinaityte: 0000-0002-6873-2852  
25  
26  
27 77 Hilde Margrethe Norum: 0000-0001-8123-7488  
28  
29  
30 78 Geir Selbæk: 0000-0001-6511-8219  
31  
32  
33 79 Melanie Rae Simpson: 0000-0003-2763-6343  
34  
35  
36 80 Nils Kristian Skjærvold: 0000-0002-0085-7042  
37  
38  
39 81 Eva Skovlund: 0000-0002-2997-6141  
40  
41  
42 82 Arjen Slooter: 0000-0003-0804-8378  
43  
44  
45 83 Øyvind Sverre Svendsen: 0000-0003-3553-9084  
46  
47  
48 84 Alexander Wahba: 0000-0001-7838-8162  
49  
50  
51 85 Henrik Zetterberg: 0000-0003-3930-4354  
52  
53  
54 86 Torgeir Bruun Wyller: 0000-0002-0330-9471  
55  
56  
57  
58 87  
59  
60

1  
2  
3 88  
4  
5

6 89 **Word count:** Abstract = 277 words. Body = 4606 words  
7  
8

9 90  
10  
11

12 91 **Key words:** delirium, prevention, dexmedetomidine, clonidine, cardiac surgery, frailty, older,  
13

14 92 cognitive decline  
15  
16

17 93  
18  
19

20 94  
21  
22  
23  
24  
25  
26  
27  
28  
29  
30  
31  
32  
33  
34  
35  
36  
37  
38  
39  
40  
41  
42  
43  
44  
45  
46  
47  
48  
49  
50  
51  
52  
53  
54  
55  
56  
57  
58  
59  
60

For peer review only

95 **ABSTRACT**

96 **Introduction:** Postoperative delirium is common in older cardiac surgery patients and associated with  
97 negative short-term and long-term outcomes. The alpha-2-adrenergic receptor agonist  
98 dexmedetomidine shows promise as prophylaxis and treatment for delirium in intensive care units  
99 (ICU) and postoperative settings. Clonidine has similar pharmacological properties and can be  
100 administered both parenterally and orally. We aim to study whether repurposing of clonidine can  
101 represent a novel treatment option for delirium, and the possible effects of dexmedetomidine and  
102 clonidine on long-term cognitive trajectories, motor activity patterns and biomarkers of neuronal  
103 injury, and whether these effects are associated with frailty status.

104 **Methods and analysis:** This five-centre, double blind randomised controlled trial will include 900  
105 cardiac surgery patients aged 70+. Participants will be randomized 1:1:1 to dexmedetomidine or  
106 clonidine or placebo. The study drug will be given as a continuous intravenous infusion from the start  
107 of cardiopulmonary bypass, at a rate of 0.4 µg/kg/h. The infusion rate will be decreased to 0.2  
108 µg/kg/h postoperatively and be continued until discharge from the ICU or 24 hours postoperatively,  
109 whichever happens first.

110 Primary endpoint is the 7-day cumulative incidence of postoperative delirium (Diagnostic and  
111 Statistical Manual of Mental Disorders, 5th edition). Secondary endpoints include the composite  
112 endpoint of coma, delirium or death, in addition to delirium severity and motor activity patterns,  
113 levels of circulating biomarkers of neuronal injury, cognitive function and frailty status 1 and 6  
114 months after surgery.

115 **Ethics and dissemination:** This trial is approved by the Regional Committee for Ethics in Medical  
116 Research in Norway (South-East Norway) and by the Norwegian Medicines Agency. Dissemination  
117 plans include publication in peer-reviewed medical journals and presentation at scientific meetings.

118 **Trial registration number:** EudraCT: 2021-001645-12. ClinicalTrials.gov: NCT05029050

1  
2  
3 119 **STRENGTHS AND LIMITATIONS OF THIS STUDY**  
4  
5

- 6 120 • This multicentre trial will provide evidence for prophylactic efficacy of dexmedetomidine and  
7  
8 121 clonidine in reducing the incidence of postoperative delirium as well as decline in cognitive  
9  
10 122 function 1 and 6 months postoperatively in older cardiac surgical patients  
11  
12  
13 123 • Inclusion of preoperative frailty assessments will provide evidence for frailty as a predictive  
14  
15 124 marker of treatment effect  
16  
17 125 • The analysis of biomarkers will provide insights into the neural mechanisms in postoperative  
18  
19 126 delirium and long-term cognitive dysfunction  
20  
21  
22 127 • The analysis of activity by accelerometers will provide insight into motor activity patterns in  
23  
24 128 subtypes of delirium  
25  
26 129 • The dose of the active drugs may potentially be too low or the duration of treatment too  
27  
28 130 short in order to show effects  
29  
30  
31  
32  
33  
34  
35  
36  
37  
38  
39  
40  
41  
42  
43  
44  
45  
46  
47  
48  
49  
50  
51  
52  
53  
54  
55  
56  
57  
58  
59  
60

## 131 **BACKGROUND**

132 Delirium represents an acute change in awareness, attention and cognition, precipitated by an acute  
133 illness, trauma, intoxication or surgery.<sup>1,2</sup> Common additional features are agitation, hallucinations  
134 and poor compliance with medical treatment and care.

135 Delirium appears in all parts of the health care service, including intensive care units (ICUs) and  
136 postoperative settings, regular hospital wards, nursing homes, home nursing services and palliative  
137 departments. In a recent meta-analysis, Greaves and co-workers found a delirium prevalence of 24%  
138 postoperatively after coronary artery bypass grafting (CABG) surgery, aggregated over all age  
139 groups.<sup>3</sup> In a Norwegian study of patients  $\geq 80$  years undergoing open aortic valve replacement, the  
140 prevalence of postoperative delirium was above 60%.<sup>4</sup> Open heart surgery patients are especially  
141 susceptible to delirium. Probable causes may be established cardiovascular disease, micro-embolism  
142 from cardiopulmonary bypass (CPB), perioperative circulatory changes including ischemia-  
143 reperfusion injuries, systemic inflammation, blood-brain barrier disruption and very deep  
144 anaesthesia.<sup>5,6</sup>

145 Delirium is difficult to handle in clinical settings, increases length of hospital stay and the need for  
146 long-term care,<sup>7,8,9</sup> is expensive for the society,<sup>10</sup> represents a frightening experience for the patient  
147 and the relatives,<sup>11</sup> and is an independent risk factor for death after cardiac surgery.<sup>12</sup> Delirium is an  
148 independent risk factor for cognitive decline in older adults, and induces a more rapid trajectory of  
149 deterioration in those who already have dementia.<sup>13,14</sup>

150 Frailty is a risk factor for delirium,<sup>15</sup> but less is known regarding how frailty assessments can guide  
151 prophylactic and therapeutic measures and shared decision making.<sup>16</sup> Frailty is a state of impaired  
152 physiologic reserve and decreased resistance to stressors, which increases the risk of an adverse  
153 outcome.<sup>17,18</sup> It is a consequence of cumulative decline in many physiological systems.

1  
2  
3 154 Conventionally, delirium has been separated into hyperactive and hypoactive subtypes based on  
4  
5 155 clinical impression,<sup>19</sup> but recent research using body-worn sensors indicates a more heterogeneous  
6  
7 156 pattern of motor activity across the clinical delirium motor subtypes.<sup>20 21</sup> Small light-weight body-  
8  
9  
10 157 worn accelerometers may provide objective measures of the effectiveness of delirium treatment  
11  
12 158 intervention on motor activity level and types of patterns. A small postoperative study on cardiac  
13  
14 159 surgery patients showed the possibility of detecting the amount of movement in sedated patients.<sup>22</sup>

160 Delirium is multifactorial and relate to both predisposing and to precipitating factors.<sup>1,2</sup> Routinely,  
161 several actions are taken in perioperative care to minimize the risk of delirium, such as appropriate  
162 management of pain and minimizing the use of sedative drugs like benzodiazepines. Further, non-  
163 pharmacological multicomponent interventions are essential,<sup>23</sup> but there is currently no compelling  
164 evidence to support the use of specific prophylactic pharmacological measures in routine  
165 perioperative care for patients at risk of postoperative delirium.<sup>24</sup>

166 However, dexmedetomidine, a parenterally administered alpha-2-adrenergic receptor agonist that  
167 attenuates sympathetic nervous system activity, shows promise as prophylaxis and treatment for  
168 delirium in ICUs and postoperative settings.<sup>25 26</sup> It has been hypothesised that dexmedetomidine may  
169 reduce postoperative delirium via its sympatholytic, anti-inflammatory and organ-protective  
170 effects.<sup>27 28</sup> In a recent meta-analysis, perioperative use of dexmedetomidine in various surgical  
171 procedures was associated with a lower incidence of postoperative delirium. The relative risk (RR)  
172 and 95% confidence interval (CI) was 0.52 (0.39-0.70) when compared with placebo.<sup>25</sup> Among newer  
173 studies in cardiac surgery, some,<sup>29-32</sup> but not all,<sup>33 34</sup> have found a beneficial short time effect on the  
174 incidence of delirium. A meta-analysis in cardiac surgery patients showed that dexmedetomidine  
175 could reduce the risk of postoperative delirium (Odds Ratio 0.56, 95% CI 0.36-0.89).<sup>35</sup> This meta-  
176 analysis even included the largest trial by Turan et al., with 800 participants, that was negative for  
177 dexmedetomidine.<sup>34</sup> To the best of our knowledge, effects of dexmedetomidine upon long time

1  
2  
3 178 cognitive trajectories have so far not been assessed in this patient population. Nevertheless, the use  
4  
5 179 of dexmedetomidine in ICUs is rapidly increasing.<sup>26</sup>  
6  
7

8 180 An alternative agent is clonidine, which has similar pharmacological properties to  
9  
10 181 dexmedetomidine,<sup>36</sup> even though it's alpha-2-adrenergic selectivity is lower.<sup>37</sup> Clonidine can be  
11  
12 182 administered both parenterally and orally, thus potentially widening its clinical usefulness.<sup>36 37</sup>  
13  
14 183 Clonidine was originally launched as an antihypertensive agent, but it is also used as an analgesic  
15  
16 184 drug. Further, clonidine has a long tradition as a sedative in patients with hyperactive delirium, and is  
17  
18 185 used by several anaesthesiologists and intensivists.<sup>38</sup> This practice is based on their clinical  
19  
20 186 experiences and knowledge on the drug's properties, but is so far not supported by placebo-  
21  
22 187 controlled clinical trials. A pilot study indicated that clonidine infusion during the period of weaning  
23  
24 188 from mechanical ventilation after surgery for aortic dissection may reduce the severity of delirium.<sup>39</sup>  
25  
26 189 A recent study compared clonidine with dexmedetomidine postoperatively after CABG and found  
27  
28 190 better effect on risk and duration of delirium of dexmedetomidine. Since no placebo control group  
29  
30 191 was included, that study could not assess potential effects of clonidine.<sup>40</sup>  
31  
32  
33  
34  
35

36 192 Thus, there is a need for prospective large-scale studies on the potential prophylactic effect of alpha-  
37  
38 193 2-adrenergic receptor agonists on delirium in susceptible patients. The aims of the present planned  
39  
40 194 trial are to study 1) whether repurposing of clonidine can represent a novel treatment option for  
41  
42 195 delirium, and 2) the possible effects of dexmedetomidine and clonidine on long-term cognitive  
43  
44 196 trajectories, motor activity patterns, patient rated outcome measures and biomarkers of neuronal  
45  
46 197 injury, and 3) whether these effects are associated with frailty status.  
47  
48  
49

50 198

51  
52  
53 199  
54  
55  
56  
57  
58  
59  
60



## 200 **METHODS AND ANALYSIS**

### 201 **Study design**

202 ALPHA2PREVENT is a nationwide five-centre, double blind randomised controlled trial (RCT). Patients  
203 aged 70+ scheduled for open heart surgery will be randomized 1:1:1 to dexmedetomidine or  
204 clonidine or placebo. The patients will be cognitively assessed preoperatively, then assessed for any  
205 symptoms of delirium according to the Diagnostic and Statistical Manual of Mental Disorders, 5th  
206 edition (DSM-5) criteria<sup>41</sup> or subsyndromal delirium<sup>42</sup> postoperatively, and finally assessed for  
207 cognitive function after 1 and 6 months (figure 1).

### 208 **Study locations**

209 The trial will be carried out at Oslo University Hospital (Ullevaal and Rikshospitalet) in Oslo,  
210 Haukeland University Hospital in Bergen, Trondheim University Hospital in Trondheim, and the  
211 University Hospital of Northern Norway in Tromsø, all in Norway.

### 212 **Participants, randomisation and blinding**

213 Patients will be assessed for eligibility and asked for participation in cooperation with the responsible  
214 thoracic surgeons or anaesthesiologists. A full listing of trial inclusion and exclusion criteria is  
215 displayed in table 1. Participants must be  $\geq 70$  years old, accepted for cardiac surgery with CPB and  
216 capable of giving signed informed consent. The surgical procedures may constitute CABG, valve  
217 replacement, surgery on the ascending aorta, or combinations of these. Main exclusion criteria are  
218 bradycardia, uncontrolled hypotension, ischemic stroke the last month or acute coronary syndrome  
219 last 24 hours,<sup>43</sup> left ventricular ejection fraction  $< 40\%$ , severe renal failure or hepatic dysfunction,  
220 sepsis, planned deep hypothermia and circulatory arrest, as well as emergency surgery.

### 221 **Table 1. Inclusion and exclusion criteria**

|                                                                                                                                                                                                                                                                                                                                                                                                                                                                                                   |                                                                                                                                                                                                                                                                                                                                                                                                                                                                                                                                                                                                                                                                                                                                                                                                                                                                                                                                                                                                                |
|---------------------------------------------------------------------------------------------------------------------------------------------------------------------------------------------------------------------------------------------------------------------------------------------------------------------------------------------------------------------------------------------------------------------------------------------------------------------------------------------------|----------------------------------------------------------------------------------------------------------------------------------------------------------------------------------------------------------------------------------------------------------------------------------------------------------------------------------------------------------------------------------------------------------------------------------------------------------------------------------------------------------------------------------------------------------------------------------------------------------------------------------------------------------------------------------------------------------------------------------------------------------------------------------------------------------------------------------------------------------------------------------------------------------------------------------------------------------------------------------------------------------------|
| <p>Participants are eligible to be included in the study only if all of the following criteria apply:</p>                                                                                                                                                                                                                                                                                                                                                                                         | <p>Participants are excluded from the study if any of the following criteria apply:</p>                                                                                                                                                                                                                                                                                                                                                                                                                                                                                                                                                                                                                                                                                                                                                                                                                                                                                                                        |
| <p>1. Participant must be <math>\geq 70</math> years old at the time of signing the informed consent.</p> <p>2. Participant must be accepted for cardiac surgery with cardiopulmonary bypass. The surgical procedures may constitute 1) coronary bypass grafting, 2) tricuspid, mitral, or aortic valve replacement or repair, 3) surgery on the ascending aorta, and 4) the combination of any of these procedures.</p> <p>3. Participant must be capable of giving signed informed consent.</p> | <p>4. Preoperative delirium (present at time of potential inclusion)</p> <p>5. Known hypersensitivity to the active ingredient or components of the product</p> <p>6. Bradycardia due to sick-sinus-syndrome, 2nd or 3rd degree AV-block (if not treated with pacemaker) or any other reason causing HR <math>&lt; 50</math> bpm at time of inclusion</p> <p>7. Uncontrolled hypotension</p> <p>8. Ischemic stroke or transitory ischemic attack the last month or critical peripheral ischemia</p> <p>9. Acute coronary syndrome last 24 hours. Acute coronary syndrome is defined according to international guidelines</p> <p>10. Left ventricular ejection fraction <math>&lt; 40\%</math></p> <p>11. Severe renal impairment (estimated GFR <math>&lt; 20</math> ml/min) or expected requirement for renal replacement therapy</p> <p>12. Severe hepatic dysfunction (liver enzyme three times the upper limit of normal together with a serum albumin concentration below the normal reference limit</p> |

|  |                                                                                                                                                                                                                                                                                                                                                                                                                                                                                                                                                               |
|--|---------------------------------------------------------------------------------------------------------------------------------------------------------------------------------------------------------------------------------------------------------------------------------------------------------------------------------------------------------------------------------------------------------------------------------------------------------------------------------------------------------------------------------------------------------------|
|  | <p>13. Reduced peripheral autonomous activity (e.g., spinal cord injury)</p> <p>14. Current use of tricyclic antidepressants, monoamine reuptake inhibitors or ciclosporin</p> <p>15. Endocarditis or sepsis</p> <p>16. Pheochromocytoma</p> <p>17. Planned deep hypothermia and circulatory arrest</p> <p>18. Emergency surgery, defined as less than 24 hours from admission to surgery</p> <p>19. Previously included in this study</p> <p>20. Not speaking or reading Norwegian</p> <p>21. Any other condition as evaluated by the treating physician</p> |
|--|---------------------------------------------------------------------------------------------------------------------------------------------------------------------------------------------------------------------------------------------------------------------------------------------------------------------------------------------------------------------------------------------------------------------------------------------------------------------------------------------------------------------------------------------------------------|

222 AV-block, atrioventricular block; HR, heart rate; GFR, glomerular filtration rate

223 Consenting patients will be randomly assigned 1:1:1, to dexmedetomidine, clonidine or placebo.

224 Randomization will be computer generated with random permuted block sizes of 3 or 6, and  
 225 stratified according to study centre. Allocation will be concealed by a web-based system that can be  
 226 accessed no earlier than 3 days before surgery. The study drug will be prepared by an otherwise  
 227 uninvolved research associate, ensuring that investigators, clinicians, outcome assessors and  
 228 statisticians are blinded to the group assignment.

#### 229 **Data collected at study entry**

230 The data collection will take place in connection with routine clinical care at the relevant hospital  
 231 wards and the ICU (table 2). According to the selection criteria, electrocardiogram (ECG),

232 creatinine/estimated Glomerular Filtration Rate (eGFR), liver transaminases, albumin, and a recent  
 233 echo-cardiography will be required, as well as a screening for preoperative delirium. At study entry,  
 234 demographic data, medical history including cardiovascular and non-cardiovascular co-morbidities,  
 235 prescription drugs used, sensory impairment, presence or absence of any fall within the past year,  
 236 functional status including activities of daily living, surgical site and indication for surgery will be  
 237 obtained. Haemodynamic variables, body mass index, American Society of Anesthesiologists Physical  
 238 Status (ASA)-classification and Euroscore II will be recorded, and routine blood samples taken prior to  
 239 surgery will be registered. Blood samples for biomarkers will be drawn preoperatively and on  
 240 postoperative day 1, 3 and 5. Included patients will undergo preoperative cognitive tests and physical  
 241 tests for assessment of frailty. Patient rated outcome measures (PROMs) will be assessed by use of  
 242 the Norwegian version of the EuroQol 5 Dimension 5 Level (EQ-5D-5L) questionnaire.<sup>44</sup> The same  
 243 tests and questionnaires will be used also after 1 and 6 months, for assessment of cognitive and  
 244 functional trajectories.

245 **Table 2. Study procedures**

| Procedure                                                                             | Screening             | Baseline                   | Surgery | Postoperative day number: |   |   |   |   |   |   | Hospital discharge | 1 and 6 months |  |
|---------------------------------------------------------------------------------------|-----------------------|----------------------------|---------|---------------------------|---|---|---|---|---|---|--------------------|----------------|--|
|                                                                                       | ≤30 days before Day 0 | -3 to -1 days before Day 0 | Day 0   | 1                         | 2 | 3 | 4 | 5 | 6 | 7 |                    |                |  |
| Informed consent                                                                      | X                     |                            |         |                           |   |   |   |   |   |   |                    |                |  |
| Assessment of eligibility                                                             | X                     |                            |         |                           |   |   |   |   |   |   |                    |                |  |
| Routine blood tests (i.e. creatinine, liver transaminases, albumin, troponin, proBNP) | X                     |                            |         |                           |   |   |   |   |   |   |                    | X              |  |
| ECG                                                                                   | X                     |                            |         | X                         |   |   |   |   |   |   |                    |                |  |
| Physical examination                                                                  | X                     |                            |         |                           |   |   |   |   |   |   |                    |                |  |







1  
2  
3 265 delirium develops and pharmacological intervention is needed, the study drug will be stopped, and  
4  
5 266 further treatment will be according to local routines and the treating physician's preferences.  
6  
7

8 267 **Primary endpoint**  
9

10  
11 268 The primary endpoint for ALPHA2PREVENT is the cumulative incidence of postoperative delirium  
12  
13 269 within 7 days. Postoperative delirium assessment will start as soon as possible after admission to the  
14  
15 270 ICU, and will continue daily until the seventh postoperative day or until discharge from the university  
16  
17 271 hospital, whichever happens first. To allow for differences in the duration of the postoperative  
18  
19 272 observation period, time until delirium diagnosis will be recorded and the cumulative incidence will  
20  
21 273 be assessed using Kaplan Meier estimates and compared between groups with the log-rank test as  
22  
23 274 described below. A clinical assessment for delirium will also be repeated at the 1-month follow-up, to  
24  
25 275 pick up signs of persistent delirium.  
26  
27  
28  
29

30 276 The diagnosis of delirium will be ascertained using all available information, and will be determined  
31  
32 277 to be present if participants meet all DSM-5 criteria<sup>41</sup> by using a standardized procedure developed  
33  
34 278 for our previous study<sup>45</sup> and as recommended by others<sup>46</sup>, table 3. The methods are refined in order,  
35  
36 279 in a stepwise approach, to assess presence or absence of the diagnostic criteria in DSM-5 and will be  
37  
38 280 carried out once daily by specially trained research assistants. Level of arousal will be assessed using  
39  
40 281 the Norwegian versions of Richmond Agitation Sedation Scale (RASS)<sup>47</sup> and Observational Scale of  
41  
42 282 Level of Arousal (OSLA).<sup>48</sup> Attention and awareness will be evaluated using objective tests (vigilance  
43  
44 283 "A"-test, months of the years backwards, days of the week backwards, and counting down from 20 to  
45  
46 284 1)<sup>49</sup> and observations by the examiner of the patient's distractibility, comprehension and tendency to  
47  
48 285 lose the thread of conversation. Presence of additional cognitive disturbances will be assessed by  
49  
50 286 tests for orientation and recall test of three words (different words for each day), as well as  
51  
52 287 information derived from nursing staff and clinical notes. Acute change in the patient's mental  
53  
54 288 condition, and fluctuations of any disturbance, will be ascertained through informant history from  
55  
56 289 nursing staff and derived from clinical notes. Nurses will, as part of their routine and for each shift  
57  
58  
59  
60



290 (i.e., three times daily), actively register symptoms of delirium in the case notes, as well as screen for  
 291 delirium using the Norwegian version of the Confusion Assessment Method for Intensive Care Units  
 292 (CAM-ICU)<sup>50</sup> and RASS. The same delirium assessment tools will be used for the ICU, step-down and  
 293 bed wards. The results from each of the CAM-ICU-items, as well as the total CAM-ICU score, will also  
 294 be used as a source of information for making the final delirium diagnosis.

295 Finally, as a quality assurance, two or more highly experienced delirium researchers will  
 296 independently use all available information (including the research assistants' assessments) on each  
 297 patient to decide if the DSM-5 criteria for delirium are fulfilled. An interrater agreement for the  
 298 diagnosis of delirium will be calculated and disagreements will be resolved through discussion.

299 Subsyndromal delirium (table 3) will be defined as evidence of change, in addition to any one of  
 300 these: altered arousal, attentional deficits, other cognitive change, delusions or hallucinations. DSM-  
 301 5 delirium criteria D and E must be met.

303 **Table 3. Diagnostic algorithm for DSM-5 delirium.**

| DSM-5 criteria                                                                                                                                                           | Tests to be performed or information needed |                                            | Criterium fulfilled? |    |
|--------------------------------------------------------------------------------------------------------------------------------------------------------------------------|---------------------------------------------|--------------------------------------------|----------------------|----|
|                                                                                                                                                                          |                                             |                                            | Yes                  | No |
| A. Disturbance in <b>attention</b> (i.e., reduced ability to direct, focus, sustain, and shift attention) and <b>awareness</b> (reduced orientation to the environment). | <b>TEST</b>                                 | <b>Cut off (definition of inattention)</b> |                      |    |
|                                                                                                                                                                          | <b>Digit span forward</b>                   | less than 5 forward                        |                      |    |
|                                                                                                                                                                          | <b>SAVEAHAART</b>                           | more than 2 errors                         |                      |    |
|                                                                                                                                                                          | <b>Days of the week backwards</b>           | any error                                  |                      |    |

1  
2  
3  
4  
5  
6  
7  
8  
9  
10  
11  
12  
13  
14  
15  
16  
17  
18  
19  
20  
21  
22  
23  
24  
25  
26  
27  
28  
29  
30  
31  
32  
33  
34  
35  
36  
37  
38  
39  
40  
41  
42  
43  
44  
45  
46  
47  
48  
49  
50  
51  
52  
53  
54  
55  
56  
57  
58  
59  
60

|                                                                                                                                                                                                                                              |                                                                                                                                                                                                                                                                                                                                                                                                                                                                                                                                                                                                                                                                                                             |                                     |                     |                                     |           |                             |           |  |
|----------------------------------------------------------------------------------------------------------------------------------------------------------------------------------------------------------------------------------------------|-------------------------------------------------------------------------------------------------------------------------------------------------------------------------------------------------------------------------------------------------------------------------------------------------------------------------------------------------------------------------------------------------------------------------------------------------------------------------------------------------------------------------------------------------------------------------------------------------------------------------------------------------------------------------------------------------------------|-------------------------------------|---------------------|-------------------------------------|-----------|-----------------------------|-----------|--|
|                                                                                                                                                                                                                                              | <table border="1"> <tr> <td data-bbox="687 190 986 338"><b>Months of the year backwards</b></td> <td data-bbox="986 190 1252 338">unable to pass June</td> </tr> <tr> <td data-bbox="687 338 986 486"><b>Count backwards from 20 to 1</b></td> <td data-bbox="986 338 1252 486">any error</td> </tr> <tr> <td data-bbox="687 486 986 573"><b>Digit span backwards</b></td> <td data-bbox="986 486 1252 573">&lt;5 digits</td> </tr> </table>                                                                                                                                                                                                                                                                | <b>Months of the year backwards</b> | unable to pass June | <b>Count backwards from 20 to 1</b> | any error | <b>Digit span backwards</b> | <5 digits |  |
| <b>Months of the year backwards</b>                                                                                                                                                                                                          | unable to pass June                                                                                                                                                                                                                                                                                                                                                                                                                                                                                                                                                                                                                                                                                         |                                     |                     |                                     |           |                             |           |  |
| <b>Count backwards from 20 to 1</b>                                                                                                                                                                                                          | any error                                                                                                                                                                                                                                                                                                                                                                                                                                                                                                                                                                                                                                                                                                   |                                     |                     |                                     |           |                             |           |  |
| <b>Digit span backwards</b>                                                                                                                                                                                                                  | <5 digits                                                                                                                                                                                                                                                                                                                                                                                                                                                                                                                                                                                                                                                                                                   |                                     |                     |                                     |           |                             |           |  |
| <p>B. The disturbance develops over a <b>short period of time</b> (usually hours to a few days), represents a <b>change</b> from baseline attention and awareness, and tends to <b>fluctuate</b> in severity during the course of a day.</p> | <p><u>Observation (by the examiner during the interview):</u></p> <p>Distractibility. Comprehension. Tendency to lose the tread of conversation</p> <p>Level of arousal measured using RASS and OSLA</p> <hr/> <p>Acute onset and/or fluctuation obtained from informant history from nursing staff and clinical notes</p> <p><u>Questions to carer/ nursing staff or derived from clinical notes:</u></p> <p>Has there been a sudden change in the patient’s mental state?</p> <p>Does the patient seem to be better at any period in the day compared to other times?</p> <p>Has the level of consciousness been altered (drowsy/ not interacting or agitated)?</p> <p>Sleep-wake cycle disturbances?</p> |                                     |                     |                                     |           |                             |           |  |

|                                                                                                                                                                                                                                                 |                                                                                                                                                                                                                                                                                                                                                                                                                                                                               |  |  |
|-------------------------------------------------------------------------------------------------------------------------------------------------------------------------------------------------------------------------------------------------|-------------------------------------------------------------------------------------------------------------------------------------------------------------------------------------------------------------------------------------------------------------------------------------------------------------------------------------------------------------------------------------------------------------------------------------------------------------------------------|--|--|
| <p>C. An additional disturbance in <b>cognition</b> (e.g., memory deficit, disorientation, language, visuospatial ability, or perception).</p>                                                                                                  | <p><u>Questions to the patient:</u></p> <p>Orientation to time, place and person</p> <p>3 item recall at three minutes</p> <p>Questions from CAM-ICU: Why are you in hospital? Will a stone float in water? Are there fish in the sea?</p> <p><u>Questions to carer/ nursing staff or derived from clinical notes:</u></p> <p>Any evidence of perceptual disturbances as illusions or hallucinations? Memory disturbances? Psychotic symptoms? Psychomotor abnormalities?</p> |  |  |
| <p>D. The disturbances in criteria A and C are <b>not explained by another preexisting, established, or evolving neurocognitive disorder</b> and do not occur in the context of a severely reduced level of arousal, such as coma.</p>          | <p>Information from history/chart/clinical assessment</p>                                                                                                                                                                                                                                                                                                                                                                                                                     |  |  |
| <p>E. There is evidence from the history, physical examination, or laboratory findings that the disturbance is a direct <b>physiologic consequence</b> of another medical condition, substance intoxication or withdrawal (i.e., because of</p> | <p>By virtue of the surgery, all participants are considered to fulfil this criterion.</p>                                                                                                                                                                                                                                                                                                                                                                                    |  |  |

|                                                                                                   |                                                                                                                                                                                                                  |  |  |
|---------------------------------------------------------------------------------------------------|------------------------------------------------------------------------------------------------------------------------------------------------------------------------------------------------------------------|--|--|
| a drug of abuse or to a medication), or exposure to a toxin or is because of multiple etiologies. |                                                                                                                                                                                                                  |  |  |
| <b>Delirium</b> based on the tests and information above?                                         | All DSM-5 criteria fulfilled                                                                                                                                                                                     |  |  |
| <b>Subsyndromal delirium</b> based on the tests and information above?                            | Defined as evidence of change, in addition to any one of these: (a) altered arousal, (b) attentional deficits, (c) other cognitive change, (d) delusions or hallucinations.<br><br>Criteria D and E must be met. |  |  |

304 DSM-5, Diagnostic and Statistical Manual of Mental Disorders, 5th edition; RASS, Richmond Agitation

305 Sedation Scale; OSLA, Observational Scale of Level of Arousal; CAM-ICU, Confusion Assessment

306 Method for Intensive Care Units

307

### 308 **Secondary endpoints**

309 Secondary endpoints include the composite endpoint of coma, delirium or death, in addition to  
 310 number of delirium days, delirium severity and motor activity patterns, comparison to inclusion of  
 311 serum concentrations of neurofilament light (NFL) and p-tau181 1, 3 and 5 days postoperatively, as  
 312 well as change from inclusion to 1 and 6 months after the operation in different cognitive tests,  
 313 patient rated health status, frailty status, and comparison of change in frailty status. In explorative  
 314 analyses, the secondary outcomes will also be assessed between patients with or without  
 315 postoperative delirium. We will also assess if preoperative frailty status modifies the effect of  
 316 dexmedetomidine and clonidine treatment, by studying the interaction between preoperative frailty  
 317 and treatment on delirium and the other mentioned endpoints.

1  
2  
3 318 All endpoints will be assessed using Norwegian versions of validated instruments: Delirium severity  
4  
5 319 will be measured using CAM-ICU-7,<sup>51</sup> OSLA<sup>48</sup> and RASS;<sup>47</sup> motor activity patterns using body worn  
6  
7 320 accelerometers; cognitive function using Montreal Cognitive Assessment (MoCA),<sup>52</sup> immediate and  
8  
9 321 delayed recall from The Ten Words Memory Task from The Consortium to Establish a Registry for  
10  
11 322 Alzheimer's Disease,<sup>53</sup> Trail Making Test (TMT) version A and B,<sup>54</sup> semantic and phonemic verbal  
12  
13 323 fluency,<sup>55</sup> digit span forwards and backwards (by Wechsler Adult Intelligence Scale);<sup>56</sup> frailty will be  
14  
15 324 measured by a comprehensive geriatric assessment (including medical history, number of prescribed  
16  
17 325 drugs, sensory impairment, activity of daily living, gait speed, handgrip strength, chair stand and  
18  
19 326 nutritional status) calculating a frailty-index (range, 0-1; higher values indicate greater frailty) based  
20  
21 327 on the accumulation of deficits model of frailty<sup>57 58</sup> and by the shorter Essential Frailty Toolset;<sup>59</sup> and  
22  
23 328 patient rated health status using the EQ-5D-5L questionnaire.<sup>44</sup>

24  
25  
26  
27  
28 329 For assessment of cognitive trajectories, the same cognitive tests will be performed in a stable phase  
29  
30 330 preoperatively as well as after 1 and 6 months. Information regarding functional status will be  
31  
32 331 obtained from the patient preoperatively and from either the patient or their proxy at follow-up,  
33  
34 332 depending on the patient's ability to provide detailed information.

35  
36  
37  
38 333 For a sub-sample of one hundred patients from the Trondheim cohort, motor activity will be  
39  
40 334 measured by 3D accelerometer inertial sensors (AX3 sensors) (Axivity Ltd., Newcastle, UK) sampled at  
41  
42 335 100 Hz and processed using custom made software. Accelerometers will be attached to the frontal  
43  
44 336 part of the waist, the dominant thigh (ventrally, midthigh), and on the dominant wrist pre surgery.  
45  
46 337 Motor activity patterns will be monitored continuously (day and nights) before and the five first days  
47  
48 338 after surgery or until discharge from hospital, and over one week after 1 and 6 months. Sensor data  
49  
50 339 will be analyzed regarding both quantity and quality of movements and compared with the clinical  
51  
52 340 delirium assessments.

53  
54  
55  
56  
57 341 **Biomarkers**  
58  
59  
60

1  
2  
3 342 In addition to routine blood tests, blood will be taken in the morning for specific study analyses  
4  
5 343 (serum, plasma and wholeblood) before surgery, and at postoperative day 1, 3 and 5 (or earlier if  
6  
7 344 discharged before day 5) and frozen at  $-80^{\circ}\text{C}$  locally. Frozen samples will then be shipped to the  
8  
9 345 coordinating centre (Oslo) to be stored in a biobank at  $-80^{\circ}\text{C}$  for future analyses. The stored blood  
10  
11 346 samples will be analysed for promising markers such as NFL already known to be associated with  
12  
13 347 delirium,<sup>60</sup> p-tau181 associated with dementia and delirium,<sup>61-63</sup> and possibly other biomarkers of  
14  
15 348 neuronal degeneration, neuroinflammation and neurotransmitters,<sup>64-68</sup> using state-of-the-art  
16  
17 349 ultrasensitive assays to evaluate their association with observed clinical responses to the study drugs.  
18  
19  
20  
21

### 22 350 **Standardised training**

23  
24  
25 351 The research assistants across all sites will receive standardized training for all study measures prior  
26  
27 352 to study initiation, including cognitive tests, delirium assessments and measurements of frailty  
28  
29 353 indicators. Retraining will be provided as necessary. Detailed instructions and operation manuals in  
30  
31 354 Norwegian language, including an instruction video for the MoCA, will be made available to all  
32  
33 355 assessors.  
34  
35

### 36 356 **Data management and monitoring**

37  
38  
39  
40 357 Participant data will be collected by authorized trained personnel, be recorded on electronic Case  
41  
42 358 Report Forms (CRF) and stored on a password protected database. Paper files will be stored in locked  
43  
44 359 cabinets accessible to team members only. Study monitors will perform ongoing source data  
45  
46 360 verification to confirm that data entered into the CRFs are accurate, complete, and verifiable from  
47  
48 361 source documents; that the safety and rights of participants are being protected; and that the study  
49  
50 362 is being conducted in accordance with the currently approved protocol, International Conference on  
51  
52 363 Harmonization Good Clinical Practice, and all applicable regulatory requirements. Records and  
53  
54 364 documents, including signed Informed Consent Forms, pertaining to the conduct of this study will be  
55  
56 365 retained by the investigators for 15 years after study completion.  
57  
58  
59  
60

1  
2  
3 367 **Safety and adverse events management**  
4  
5

6 368 Immediate safety concerns will be handled by the treating anaesthesiologist, who will determine if  
7  
8 369 the participant should continue or discontinue study intervention. If the patient is hemodynamically  
9  
10 370 unstable at any time during infusion of the study medication or difficult to wake up after surgery, the  
11  
12 371 infusion can be temporarily stopped, as decided by the treating physician. In such a case the patient  
13  
14 372 will continue in the study. The reason for temporary discontinuation will be recorded. Since patients  
15  
16 373 are closely monitored in the perioperative phase of cardiac surgery, potential adverse circulatory  
17  
18 374 effects will be rapidly revealed and corrected;

- 21  
22  
23 375 • Temporal epicardial pacing wires are placed routinely during cardiac surgery, and  
24  
25 376 bradycardia will be treated with atropine and/or pacemaker as per routine.  
26  
27 377 • Hypotension will be treated at discretion of the treating anaesthesiologists, who are  
28  
29 378 permitted to reduce dose of the study drug as necessary to preserve haemodynamic stability,  
30  
31 379 following guidelines and local routines. A Mean Arterial Pressure (MAP) >55-60mmHg is  
32  
33 380 recommended.  
34  
35 381 • If not rapid and satisfactory response on other measures is achieved, the treating  
36  
37 382 anaesthesiologist will consider to turn off the infusion/unblind the study.

38  
39  
40  
41 383 Planned time points for safety assessments are provided in table 2.  
42

43  
44 384 The following safety indicators will be compared between the three treatment groups with  
45  
46 385 appropriate statistical methods: Highest and lowest heart rate and mean arterial blood pressure,  
47  
48 386 oxygen saturation, number of units for blood transfusion, volume of postoperative blood loss, use of  
49  
50 387 pressor substances, use of rescue medication, number of episodes of bradycardia, hypotension or  
51  
52 388 hypoxemia in need of intervention, perioperative myocardial infarction and stroke, postoperative  
53  
54 389 serum concentrations of troponin and Pro B-type Natriuretic Peptide (proBNP), mortality.  
55  
56  
57  
58  
59  
60

1  
2  
3 390 An independent Data Monitoring Committee will have unblinded access to all data and meet at pre-  
4  
5 391 planned inclusion milestones and whenever the members find it necessary.<sup>69</sup> Meetings are pre-  
6  
7 392 planned after inclusion of 20, 50, 100 and 400 participants, to assess safety indicators and to advise  
8  
9 393 on continuation or termination of the study. All safety data collected will be summarized and  
10  
11 394 reviewed by the DMC for agreement of next steps. In particular, data will be reviewed by for  
12  
13 395 identification of the following events that would potentially contribute to a requirement to pause or  
14  
15 396 stop the study: Any deaths, regardless of causality; cerebral infarctions; haemodynamic variables  
16  
17 397 (time during surgery with MAP<50 mmHg, highest/lowest MAP and HR, lowest SpO<sub>2</sub>); need for  
18  
19 398 vasopressor, non-invasive ventilation, active pacing, respiratory support or extracorporeal  
20  
21 399 membrane oxygenation (ECMO); postoperative troponin values. If a pausing/stopping rule is met, a  
22  
23 400 decision will be made, based on the review, as to whether enrolment in the study will be allowed to  
24  
25 401 resume. Case unblinding will be performed for above reviews if necessary.  
26  
27  
28  
29  
30  
31  
32  
33

#### 34 403 **Current sample size justification**

35  
36  
37 404 The proportion of patients experiencing postoperative delirium after open heart surgery for all ages  
38  
39 405 has been reported to be 24%,<sup>3</sup> and higher in older adults.<sup>4</sup> Since the lower age limit in our trial is 70  
40  
41 406 years, we estimate that the proportion in the control group will be at least 30%. The most recent  
42  
43 407 meta-analysis of the effect of dexmedetomidine estimates the delirium risk to be reduced to  
44  
45 408 approximately half of the untreated group (*i.e.*, 15%).<sup>25</sup> We anticipate that the effect of clonidine  
46  
47 409 may be weaker, but still clinically relevant. We have thus powered the study based on an estimated  
48  
49 410 delirium incidence of 20% in the clonidine group. An initial, conservative sample size calculation  
50  
51 411 based on comparison of two proportions indicated that a sample size of 290 in each group (870  
52  
53 412 altogether) will give a power of 80% with a significance level of 5% to detect such a difference  
54  
55 413 between the clonidine and the placebo group in the proportion developing delirium within 7 days  
56  
57 414 postoperatively. To account for dropouts, we aim at including 900 patients. This sample size  
58  
59  
60



1  
2  
3 415 calculation approach was conservative considering the use of time-to-delirium analysis strategy,  
4  
5 416 accommodating for both a higher drop-out rate and that this trial has three-arms. We have further  
6  
7 417 confirmed the adequacy of this sample size estimate for the logrank test with differing rates of drop-  
8  
9 418 out and considering the three-arms (Figure S1, Supplementary file 1).  
10  
11  
12

### 13 419 **Statistical analysis**

14  
15  
16 420 The primary analysis population will be the intention-to-treat population, and all tests will be two-  
17  
18 421 sided. The primary objective in this study is to prevent postoperative delirium. The primary endpoint  
19  
20 422 is the cumulative incidence of postoperative delirium. In the analysis of this endpoint, time to  
21  
22 423 diagnosis of delirium will be used to account for the varying postoperative observation time due to  
23  
24 424 difference in time to discharge or transfer to other hospitals will be different. The cumulative  
25  
26 425 incidence will therefore be estimated using the Kaplan Meier estimator with time to first delirium as  
27  
28 426 the dependent variable and compare time to event curves between treatments by the logrank test.  
29  
30 427 Patients who are discharged from the university hospital during the observation period or reach the  
31  
32 428 end of the observation period (7 days) without having developed delirium, are regarded as censored.  
33  
34 429 We consider that treatment group allocation will not influence the risk of being censored. Those who  
35  
36 430 die prior to 7 days, will also be regarded as censored in the primary analysis, but we will carry out a  
37  
38 431 secondary analysis with the combined endpoint *death or delirium*. The same approach will be applied  
39  
40 432 for those who are comatose, and thus impossible to evaluate for delirium. Additional analyses may  
41  
42 433 also include estimating the incidence of delirium treating deaths as a competing risk by the Fine and  
43  
44 434 Gray method.  
45  
46  
47  
48  
49

50 435 All analyses will be adjusted for study centre which was used to as a stratification variable in the  
51  
52 436 randomisation process.  
53  
54

55 437 Sensitivity analyses will be carried out by estimating hazard ratios using Cox' proportional hazards  
56  
57 438 model to adjust for potential imbalance of prognostic factors between treatment groups.  
58  
59  
60

1  
2  
3 439 Secondary endpoints as the cumulative incidence of death, coma or postoperative delirium will be  
4  
5 440 analysed using the Kaplan Meier estimator and the logrank test as above. Additional analyses by Cox'  
6  
7 441 proportional hazards model may also be performed. Mean duration of delirium; severity of delirium;  
8  
9 442 combination of duration and severity of delirium; cognitive tests after 1 and 6 months; EQ-5D-5L  
10  
11 443 scores after 1 and 6 months; and postoperative plasma concentrations of NFL and p-tau181 will be  
12  
13 444 compared between treatments with appropriate regression models which will be defined in a  
14  
15 445 Statistical Analysis Plan prior to analysis.

16  
17  
18  
19 446 Frailty as risk factor for delirium and for adverse effects of the study medication, will be analysed by  
20  
21 447 linear or logistic regression (as appropriate), adjusted for other known risk factors. The association  
22  
23 448 between frailty and delirium will be analysed by adding frailty as a covariate in a Cox'proportional  
24  
25 449 hazards model on time to delirium (as above). Additionally, we will assess if the presence of frailty  
26  
27 450 modifies the effect of the treatment by including an interaction term between frailty and treatment  
28  
29 451 allocation in the Cox proportional hazards model. The association between frailty and occurrence of  
30  
31 452 adverse events (AE) will be estimated by logistic regression models including covariates as above.

32  
33  
34  
35  
36 453 No interim analyses of the efficacy of the treatments are planned. A detailed statistical analysis plan  
37  
38 454 will be finalized prior to unblinding.

#### 41 455 **Ethics and dissemination**

42  
43  
44 456 This trial is approved by the Regional Committee for Ethics in Medical Research in Norway (South-  
45  
46 457 East Norway) and by the Norwegian Medicines Agency, and will be conducted in accordance with  
47  
48 458 consensus ethical principles derived from international guidelines including the Declaration of  
49  
50 459 Helsinki. The results of this study will be published in peer-reviewed medical journals, as well as  
51  
52 460 presented at scientific meetings

#### 53 54 55 56 461 **Discussion**

1  
2  
3 462 To our knowledge, ALPHA2PREVENT will be the first large randomised controlled multicentre trial to  
4  
5 463 study the prophylactic efficacy of dexmedetomidine as well as clonidine on the incidence of  
6  
7 464 postoperative delirium in older cardiac surgical patients, and also including long-term cognitive  
8  
9 465 trajectories.

10  
11  
12 466 One should expect that treatment options that can prevent delirium in a short-term perspective,  
13  
14 467 would also improve the long-term cognitive prognosis. Evidence for such an effect is slowly emerging  
15  
16 468 for non-pharmacological interventions,<sup>70</sup> but is lacking regarding drug treatment.

17  
18  
19  
20 469 Published studies of dexmedetomidine for prevention of delirium in ICU vary largely with respect to  
21  
22 470 dosing regimens, from 0.1<sup>71 72</sup> to 1.4 µg/kg/h.<sup>33</sup> Many of the authors also administered an initial  
23  
24 471 bolus. In the cardiac surgery context, Turan et al started dexmedetomidine infusion already before  
25  
26 472 start of CPB, gave 0.4 µg/kg/h postoperatively,<sup>34</sup> and found more side effects in the actively treated  
27  
28 473 than in the placebo group. We have chosen a careful dosage of 0.4 µg/kg/h peroperatively and 0.2  
29  
30 474 µg/kg/h postoperatively, with no bolus, to reduce the risk of AE, but not so low that we cannot  
31  
32 475 expect an effect on delirium.

33  
34  
35  
36  
37 476 Regarding clonidine, the recommended dosage varies greatly between sources, but is mainly in the  
38  
39 477 range 1-1.5 µg/kg/h.<sup>73</sup> We will dose the drug considerably lower, to avoid side effects. There is a  
40  
41 478 shortage of studies comparing i.v. dexmedetomidine and i.v. clonidine in ICU or postoperative  
42  
43 479 settings.<sup>74</sup> To our knowledge, a widely agreed evidence-based i.v. dosage regimen has not been  
44  
45 480 developed for i.v. clonidine. A study by Grest in critically ill patients after cardiac surgery<sup>74</sup> and a  
46  
47 481 recent meta-analysis favour equipotency mg per mg.<sup>75</sup> Thus, our choice is fairly pragmatic, but the  
48  
49 482 doses are similar to that currently used in many ICUs as part of routine practice.

50  
51  
52  
53 483 To further reduce the risk of hemodynamic instability due to the combination of anaesthesiological  
54  
55 484 procedures and study drug at the start of surgery, we will postpone infusion of study drug until the  
56  
57 485 CPB is established. If clonidine is both effective and safe to administer, then it may be relevant to  
58  
59 486 conduct more studies on per oral treatment with clonidine in other patient groups later on. Efficacy

1  
2  
3 487 must first be demonstrated and found comparable to existing parenteral treatment before future  
4  
5 488 trials with oral, longer use could be explored.  
6  
7  
8 489 Strengths of this trial are the prospective and randomised placebo controlled design, the use of two  
9  
10 490 relevant and much used drugs, inclusion of a high number of patients from multiple sites, adequate  
11  
12 491 statistic strength, repeated cognitive and frailty assessments, use of body-worn accelerometers, and  
13  
14 492 repeated samples of biomarkers. The analyses of biomarkers reflecting neural injury will give us  
15  
16 493 increased understanding of the pathophysiological mechanisms of delirium. Inclusion of preoperative  
17  
18 494 frailty assessments will provide evidence for frailty as a predictive marker of treatment effect and  
19  
20 495 allow for interaction analyses. The use of body-worn accelerometers will provide insight into motor  
21  
22 496 activity patterns in subtypes of delirium.  
23  
24  
25  
26  
27 497 This trial has, however, some limitations to consider. The exclusion criteria might limit the  
28  
29 498 generalisability of our findings to other patient populations. If the incidence of delirium in the  
30  
31 499 placebo group is lower than expected, or if the anticipated effect of the treatment is smaller, the  
32  
33 500 study may be underpowered. The dose of the active drugs might be too low or the duration of  
34  
35 501 treatment be too short to influence an ongoing pathophysiological process, in order to show effects.  
36  
37 502 As many patients live far away from the study site, there is a potential for missing long-term data.  
38  
39  
40  
41 503 Should the treatment have a positive effect, it would have important beneficial implications for  
42  
43 504 patients, carers and society, such as alleviating acute patient distress and carer burden. If this  
44  
45 505 treatment could reduce longer-term negative effects of delirium, it might have significant  
46  
47 506 consequences for financial and human resource use in health care.  
48  
49  
50

507

## 508 **DECLARATIONS**

509 **Patient and public involvement:** Panellists from the user panel established by the Norwegian  
510 National Advisory Unit on Ageing and Health, participate in the Trial Advisory Board. They have

1  
2  
3 511 experience as relatives to patients with dementia or delirium, have given valuable input to the  
4  
5 512 project plans and will follow up during the project period.  
6  
7

8 513 **Ethics approval:** The trial is approved by the Regional Committee for Ethics in Medical Research in  
9  
10 514 Norway (South-east Norway) (REK 262384), June 9th 2021, and by the Norwegian Medicines Agency  
11  
12  
13 515 June 17<sup>th</sup> 2021.  
14  
15

16 516 **Availability of data and materials:** Materials can be available upon reasonable request to the  
17  
18 517 corresponding author. However, availability is dependent on approval from the Regional Ethics  
19  
20 518 Committee and the local data protection officer.  
21  
22

23 519 **Competing interest:** HZ has served at scientific advisory boards and/or as a consultant for Alector,  
24  
25 520 Eisai, Denali, Roche Diagnostics, Wave, Samumed, Siemens Healthineers, Pinteon Therapeutics,  
26  
27 521 Nervgen, AZTherapies, CogRx and Red Abbey Labs, has given lectures in symposia sponsored by  
28  
29 522 Cellectricon, Fujirebio, Alzecure and Biogen, and is a co-founder of Brain Biomarker Solutions in  
30  
31 523 Gothenburg AB (BBS), which is a part of the GU Ventures Incubator Program (outside submitted  
32  
33 524 work).  
34  
35  
36

37 525 AJCS is advisor for Prolira, a start-up company that develops an EEG-based delirium monitor. Any  
38  
39 526 (future) profits from EEG-based delirium monitoring will be used for future scientific research only.  
40  
41  
42

43 527 GS has participated in one advisory meeting for Biogen. HMN has received lecture fees from Vifor  
44  
45 528 Pharma and Orion Pharma.  
46  
47

48 529 The other authors declare that they have no competing interests.  
49  
50

51 530 **Consent for publication:** Not required  
52  
53

54 531 **Funding:** The trial is funded by KLINBEFORSK, The National Programme for Clinical Therapy Research  
55  
56 532 in the Specialist Health Service in Norway, grant number 2020204. HZ is a Wallenberg Scholar.  
57  
58  
59  
60

1  
2  
3 533 **Disclaimer:** Funders have no role in the trial design, data collection, management, analysis, writing of  
4  
5 534 the manuscript or decision to publish.

6  
7  
8 535 **Author contributions:**

9  
10  
11 536 Drafting of the manuscript: BEN

12  
13  
14 537 Critical revision of the manuscript for important intellectual content: BEN, RB, RH, JLH, AKK, SAL, IM,

15  
16 538 HMN, JR, GS, ES, NKS, ES, AS, ØSS, TT, AW, HZ, TBW, MRS

17  
18  
19 539 Obtained funding: TBW

20  
21  
22 540 All authors contributed to the writing of the manuscript and approved the final version.

23  
24  
25 541 **Acknowledgements:** The trial is investigator-initiated and investigator-led, and is conducted

26  
27 542 independently of the pharmaceutical industry. We are thankful to the staff of the participating

28  
29 543 departments for their compliance with the project directives and their caring for the patients.

30  
31  
32  
33 544

34  
35  
36 545 **Abbreviations:**

| Abbreviation          | Explanation                                                                                                                                     |
|-----------------------|-------------------------------------------------------------------------------------------------------------------------------------------------|
| AE                    | Adverse Event                                                                                                                                   |
| ALPHA2PREVENT         | Alpha-2-adrenergic receptor agonists for the prevention of delirium and cognitive decline after open heart surgery: randomised controlled trial |
| ASA<br>classification | American Society of Anesthesiologists Physical Status Classification                                                                            |
| CABG                  | Coronary Artery Bypass Grafting                                                                                                                 |
| CAM-ICU               | Confusion Assessment Method for Intensive Care Units                                                                                            |
| CPB                   | Cardiopulmonary Bypass                                                                                                                          |

|          |                                                                    |
|----------|--------------------------------------------------------------------|
| CRF      | Case Report Form                                                   |
| DSM-5    | Diagnostic and Statistical Manual of Mental Disorders, 5th edition |
| ECG      | Electrocardiogram                                                  |
| EQ-5D-5L | EuroQol 5 Dimension 5 Level                                        |
| FI       | Frailty Index                                                      |
| GFR      | Glomerular Filtration Rate                                         |
| ICU      | Intensive Care Unit                                                |
| MAP      | Mean Arterial Pressure                                             |
| MoCA     | Montreal Cognitive Assessment                                      |
| NFL      | Neurofilament light                                                |
| NRS      | Numerical Rating Scale                                             |
| OSLA     | Observational Scale of Level of Arousal                            |
| ProBNP   | Pro B-type Natriuretic Peptide                                     |
| PROM     | Patient Rated Outcome Measure                                      |
| RASS     | Richmond Agitation Sedation Scale                                  |
| RCT      | Randomised Controlled Trial                                        |
| SAE      | Serious Adverse Event                                              |
| TMT      | Trail Making Test                                                  |

546

547

1  
2  
3  
4  
5  
6  
7  
8  
9  
10  
11  
12  
13  
14  
15  
16  
17  
18  
19  
20  
21  
22  
23  
24  
25  
26  
27  
28  
29  
30  
31  
32  
33  
34  
35  
36  
37  
38  
39  
40  
41  
42  
43  
44  
45  
46  
47  
48  
49  
50  
51  
52  
53  
54  
55  
56  
57  
58  
59  
60

548 **LEGENDS**

549 **Figure 1:**

550 Study schema. MoCA, Montreal Cognitive Assessment; TMT, Trail Making Test; EQ-5D-5L, EuroQol 5

551 Dimension 5 Level; POD, Postoperative Day

552

For peer review only



553 **REFERENCES**

- 554 1. Marcantonio ER. Delirium in Hospitalized Older Adults. *The New England journal of medicine*  
555 2017;377(15):1456-66. doi: 10.1056/NEJMcp1605501 [published Online First: 2017/10/12]
- 556 2. Wilson JE, Mart MF, Cunningham C, et al. Delirium. *Nat Rev Dis Primers* 2020;6(1):90. doi:  
557 10.1038/s41572-020-00223-4
- 558 3. Greaves D, Psaltis PJ, Ross TJ, et al. Cognitive outcomes following coronary artery bypass grafting:  
559 A systematic review and meta-analysis of 91,829 patients. *International journal of cardiology*  
560 2019;289:43-49. doi: 10.1016/j.ijcard.2019.04.065 [published Online First: 2019/05/13]
- 561 4. Eide LS, Ranhoff AH, Fridlund B, et al. Comparison of frequency, risk factors, and time course of  
562 postoperative delirium in octogenarians after transcatheter aortic valve implantation versus  
563 surgical aortic valve replacement. *The American journal of cardiology* 2015;115(6):802-9. doi:  
564 10.1016/j.amjcard.2014.12.043 [published Online First: 2015/02/04]
- 565 5. Hollinger A, Siegemund M, Goettel N, et al. Postoperative Delirium in Cardiac Surgery: An  
566 Unavoidable Menace? *Journal of cardiothoracic and vascular anesthesia* 2015;29(6):1677-87.  
567 doi: 10.1053/j.jvca.2014.08.021 [published Online First: 2015/10/13]
- 568 6. Abrahamov D, Levran O, Naparstek S, et al. Blood-Brain Barrier Disruption After Cardiopulmonary  
569 Bypass: Diagnosis and Correlation to Cognition. *The Annals of thoracic surgery*  
570 2017;104(1):161-69. doi: 10.1016/j.athoracsur.2016.10.043
- 571 7. Gleason LJ, Schmitt EM, Kosar CM, et al. Effect of Delirium and Other Major Complications on  
572 Outcomes After Elective Surgery in Older Adults. *JAMA Surg* 2015;150(12):1134-40. doi:  
573 10.1001/jamasurg.2015.2606
- 574 8. Witlox J, Eurelings LS, de Jonghe JF, et al. Delirium in elderly patients and the risk of postdischarge  
575 mortality, institutionalization, and dementia: a meta-analysis. *JAMA* 2010;304(4):443-51. doi:  
576 304/4/443 [pii];10.1001/jama.2010.1013 [doi]
- 577 9. Krogseth M, Wyller TB, Engedal K, et al. Delirium is a risk factor for institutionalization and  
578 functional decline in older hip fracture patients. *Journal of psychosomatic research*

- 1  
2  
3 579 2014;76(1):68-74. doi: 10.1016/j.jpsychores.2013.10.006 [published Online First:  
4  
5 580 2013/12/24]  
6  
7 581 10. Pezzullo L, Streatfeild J, Hickson J, et al. Economic impact of delirium in Australia: a cost of illness  
8  
9 582 study. *BMJ Open* 2019;9(9):e027514. doi: 10.1136/bmjopen-2018-027514 [published Online  
10  
11 583 First: 2019/09/19]  
12  
13  
14 584 11. Instenes I, Gjengedal E, Eide LSP, et al. "Eight Days of Nightmares ... " - Octogenarian Patients'  
15  
16 585 Experiences of Postoperative Delirium after Transcatheter or Surgical Aortic Valve  
17  
18 586 Replacement. *Heart, lung & circulation* 2018;27(2):260-66. doi: 10.1016/j.hlc.2017.02.012  
19  
20 587 [published Online First: 2017/04/12]  
21  
22  
23 588 12. Gottesman RF, Grega MA, Bailey MM, et al. Delirium after coronary artery bypass graft surgery  
24  
25 589 and late mortality. *Annals of neurology* 2010;67(3):338-44. doi: 10.1002/ana.21899  
26  
27 590 [published Online First: 2010/04/08]  
28  
29  
30 591 13. Davis DH, Muniz-Terrera G, Keage HA, et al. Association of Delirium With Cognitive Decline in Late  
31  
32 592 Life: A Neuropathologic Study of 3 Population-Based Cohort Studies. *JAMA Psychiatry* 2017  
33  
34 593 doi: 10.1001/jamapsychiatry.2016.3423 [published Online First: 2017/01/24]  
35  
36  
37 594 14. Saczynski JS, Marcantonio ER, Quach L, et al. Cognitive trajectories after postoperative delirium.  
38  
39 595 *The New England journal of medicine* 2012;367(1):30-9. doi: 10.1056/NEJMoa1112923  
40  
41 596 [published Online First: 2012/07/06]  
42  
43  
44 597 15. Persico I, Cesari M, Morandi A, et al. Frailty and Delirium in Older Adults: A Systematic Review  
45  
46 598 and Meta-Analysis of the Literature. *Journal of the American Geriatrics Society*  
47  
48 599 2018;66(10):2022-30. doi: 10.1111/jgs.15503 [published Online First: 2018/09/22]  
49  
50  
51 600 16. van Beek-Peeters J, van Noort EHM, Faes MC, et al. Shared decision making in older patients with  
52  
53 601 symptomatic severe aortic stenosis: a systematic review. *Heart* 2020;106(9):647-55. doi:  
54  
55 602 10.1136/heartjnl-2019-316055 [published Online First: 2020/02/01]  
56  
57  
58 603 17. Clegg A, Young J, Iliffe S, et al. Frailty in elderly people. *Lancet* 2013;381(9868):752-62. doi:  
59  
60 604 S0140-6736(12)62167-9 [pii];10.1016/S0140-6736(12)62167-9 [doi]

- 1  
2  
3 605 18. Guidet B, de Lange DW, Boumendil A, et al. The contribution of frailty, cognition, activity of daily  
4  
5 606 life and comorbidities on outcome in acutely admitted patients over 80 years in European  
6  
7 607 ICUs: the VIP2 study. *Intensive care medicine* 2020;46(1):57-69. doi: 10.1007/s00134-019-  
8  
9 608 05853-1  
10  
11  
12 609 19. Meagher DJ, Leonard M, Donnelly S, et al. A longitudinal study of motor subtypes in delirium:  
13  
14 610 frequency and stability during episodes. *JPsychosomRes* 2012;72(3):236-41. doi: S0022-  
15  
16 611 3999(11)00298-4 [pii];10.1016/j.jpsychores.2011.11.013 [doi]  
17  
18  
19 612 20. Godfrey A, Leonard M, Donnelly S, et al. Validating a new clinical subtyping scheme for delirium  
20  
21 613 with electronic motion analysis. *Psychiatry research* 2010;178(1):186-90. doi:  
22  
23 614 10.1016/j.psychres.2009.04.010 [published Online First: 2010/05/11]  
24  
25  
26 615 21. Evensen S, Bourke AK, Lydersen S, et al. Motor activity across delirium motor subtypes in geriatric  
27  
28 616 patients assessed using body-worn sensors: a Norwegian cross-sectional study. *BMJ Open*  
29  
30 617 2019;9(2):e026401. doi: 10.1136/bmjopen-2018-026401 [published Online First:  
31  
32 618 2019/03/04]  
33  
34  
35 619 22. Harbo EF, Fuglerud SS, Skjaervold NK. Visualisation of limb movements by accelerometers in  
36  
37 620 sedated patients. *Crit Care* 2020;24(1):283. doi: 10.1186/s13054-020-02975-7 [published  
38  
39 621 Online First: 2020/06/05]  
40  
41  
42 622 23. Needham MJ, Webb CE, Bryden DC. Postoperative cognitive dysfunction and dementia: what we  
43  
44 623 need to know and do. *British journal of anaesthesia* 2017;119(suppl\_1):i115-i25. doi:  
45  
46 624 10.1093/bja/aex354 [published Online First: 2017/11/22]  
47  
48  
49 625 24. Siddiqi N, Harrison JK, Clegg A, et al. Interventions for preventing delirium in hospitalised non-ICU  
50  
51 626 patients. *The Cochrane database of systematic reviews* 2016;3:CD005563. doi:  
52  
53 627 10.1002/14651858.CD005563.pub3 [published Online First: 2016/03/12]  
54  
55  
56 628 25. Flukiger J, Hollinger A, Speich B, et al. Dexmedetomidine in prevention and treatment of  
57  
58 629 postoperative and intensive care unit delirium: a systematic review and meta-analysis.  
59  
60

- 1  
2  
3 630 *Annals of intensive care* 2018;8(1):92. doi: 10.1186/s13613-018-0437-z [published Online  
4  
5 631 First: 2018/09/22]  
6  
7 632 26. Bajwa S, Kulshrestha A. Dexmedetomidine: An Adjuvant Making Large Inroads into Clinical  
8  
9 633 Practice. *Annals of medical and health sciences research* 2013;3(4):475-83. doi:  
10 634 10.4103/2141-9248.122044 [published Online First: 2014/01/01]  
11  
12  
13  
14 635 27. Flanders CA, Rocke AS, Edwardson SA, et al. The effect of dexmedetomidine and clonidine on the  
15  
16 636 inflammatory response in critical illness: a systematic review of animal and human studies.  
17  
18 637 *Crit Care* 2019;23(1):402. doi: 10.1186/s13054-019-2690-4 [published Online First:  
19 638 2019/12/13]  
20  
21  
22  
23 639 28. Sanders RD, Wehrman J, Irons J, et al. Meta-analysis of randomised controlled trials of  
24  
25 640 perioperative dexmedetomidine to reduce delirium and mortality after cardiac surgery.  
26  
27 641 *British journal of anaesthesia* 2021; 127(5):e168-e70. doi: 10.1016/j.bja.2021.08.009  
28  
29  
30 642 29. Li CJ, Wang BJ, Mu DL, et al. Randomized clinical trial of intraoperative dexmedetomidine to  
31  
32 643 prevent delirium in the elderly undergoing major non-cardiac surgery. *The British journal of*  
33  
34 644 *surgery* 2020;107(2):e123-e32. doi: 10.1002/bjs.11354 [published Online First: 2020/01/07]  
35  
36  
37 645 30. Likhvantsev VV, Landoni G, Grebenchikov OA, et al. Perioperative Dexmedetomidine Supplement  
38  
39 646 Decreases Delirium Incidence After Adult Cardiac Surgery: A Randomized, Double-Blind,  
40  
41 647 Controlled Study. *Journal of cardiothoracic and vascular anesthesia* 2020 doi:  
42  
43 648 10.1053/j.jvca.2020.02.035 [published Online First: 2020/04/09]  
44  
45  
46 649 31. van Norden J, Spies CD, Borchers F, et al. The effect of peri-operative dexmedetomidine on the  
47  
48 650 incidence of postoperative delirium in cardiac and non-cardiac surgical patients: a  
49  
50 651 randomised, double-blind placebo-controlled trial. *Anaesthesia* 2021 doi:  
51  
52 652 10.1111/anae.15469 [published Online First: 2021/05/08]  
53  
54  
55 653 32. Peng K, Shen YP, Ying YY, et al. Perioperative dexmedetomidine and 5-year survival in patients  
56  
57 654 undergoing cardiac surgery. *British journal of anaesthesia* 2021 doi:  
58  
59 655 10.1016/j.bja.2021.03.040 [published Online First: 2021/06/05]  
60

- 1  
2  
3 656 33. Subramaniam B, Shankar P, Shaefi S, et al. Effect of Intravenous Acetaminophen vs Placebo  
4  
5 657 Combined With Propofol or Dexmedetomidine on Postoperative Delirium Among Older  
6  
7 658 Patients Following Cardiac Surgery: The DEXACET Randomized Clinical Trial. *JAMA*  
8  
9 659 2019;321(7):686-96. doi: 10.1001/jama.2019.0234 [published Online First: 2019/02/20]  
10  
11  
12 660 34. Turan A, Duncan A, Leung S, et al. Dexmedetomidine for reduction of atrial fibrillation and  
13  
14 661 delirium after cardiac surgery (DECADE): a randomised placebo-controlled trial. *Lancet*  
15  
16 662 2020;396(10245):177-85. doi: 10.1016/S0140-6736(20)30631-0 [published Online First:  
17  
18 663 2020/07/20]  
19  
20  
21 664 35. Li P, Li LX, Zhao ZZ, et al. Dexmedetomidine reduces the incidence of postoperative delirium after  
22  
23 665 cardiac surgery: a meta-analysis of randomized controlled trials. *BMC anesthesiology*  
24  
25 666 2021;21(1):153. doi: 10.1186/s12871-021-01370-1 [published Online First: 2021/05/20]  
26  
27  
28 667 36. Pichot C, Ghignone M, Quintin L. Dexmedetomidine and clonidine: from second- to first-line  
29  
30 668 sedative agents in the critical care setting? *Journal of intensive care medicine* 2012;27(4):219-  
31  
32 669 37. doi: 10.1177/0885066610396815 [published Online First: 2011/04/29]  
33  
34  
35 670 37. Khan ZP, Ferguson CN, Jones RM. alpha-2 and imidazoline receptor agonists. Their pharmacology  
36  
37 671 and therapeutic role. *Anaesthesia* 1999;54(2):146-65.  
38  
39 672 38. Wang JG, Belley-Cote E, Burry L, et al. Clonidine for sedation in the critically ill: a systematic  
40  
41 673 review and meta-analysis. *Crit Care* 2017;21(1):75. doi: 10.1186/s13054-017-1610-8  
42  
43 674 [published Online First: 2017/03/24]  
44  
45  
46 675 39. Rubino AS, Onorati F, Caroleo S, et al. Impact of clonidine administration on delirium and related  
47  
48 676 respiratory weaning after surgical correction of acute type-A aortic dissection: results of a  
49  
50 677 pilot study. *InteractCardiovascThoracSurg* 2010;10(1):58-62. doi: icvts.2009.217562  
51  
52 678 [pii];10.1510/icvts.2009.217562 [doi]  
53  
54  
55 679 40. Shokri H, Ali I. A randomized control trial comparing prophylactic dexmedetomidine versus  
56  
57 680 clonidine on rates and duration of delirium in older adult patients undergoing coronary  
58  
59  
60

- 1  
2  
3 681 artery bypass grafting. *Journal of clinical anesthesia* 2020;61:109622. doi:  
4  
5 682 10.1016/j.jclinane.2019.09.016 [published Online First: 2019/11/02]  
6  
7 683 41. American Psychiatric Association. Diagnostic and Statistical Manual of Mental Disorders: DSM-5  
8  
9 684 (5th ed.). Washington DC: American Psychiatric Association 2013.  
10  
11 685 42. Cole MG, Ciampi A, Belzile E, et al. Subsyndromal delirium in older people: a systematic review of  
12  
13 686 frequency, risk factors, course and outcomes. *Int J Geriatr Psychiatry* 2013;28(8):771-80. doi:  
14  
15 687 10.1002/gps.3891  
16  
17 688 43. Collet JP, Thiele H, Barbato E, et al. 2020 ESC Guidelines for the management of acute coronary  
18  
19 689 syndromes in patients presenting without persistent ST-segment elevation. *European heart*  
20  
21 690 *journal* 2021;42(14):1289-367. doi: 10.1093/eurheartj/ehaa575 [published Online First:  
22  
23 691 2020/08/30]  
24  
25 692 44. EuroQol G. EuroQol--a new facility for the measurement of health-related quality of life. *Health*  
26  
27 693 *policy (Amsterdam, Netherlands)* 1990;16(3):199-208. doi: 10.1016/0168-8510(90)90421-9  
28  
29 694 [published Online First: 1990/11/05]  
30  
31 695 45. Neerland BE, Hov KR, Bruun Wyller V, et al. The protocol of the Oslo Study of Clonidine in Elderly  
32  
33 696 Patients with Delirium; LUCID: a randomised placebo-controlled trial. *BMC geriatrics*  
34  
35 697 2015;15(1):7. doi: 10.1186/s12877-015-0006-3 [published Online First: 2015/04/19]  
36  
37 698 46. Oh ES, Akeju O, Avidan MS, et al. A roadmap to advance delirium research: Recommendations  
38  
39 699 from the NIDUS Scientific Think Tank. *Alzheimer's & dementia : the journal of the Alzheimer's*  
40  
41 700 *Association* 2020;16(5):726-33. doi: 10.1002/alz.12076 [published Online First: 2020/04/16]  
42  
43 701 47. Sessler CN, Gosnell MS, Grap MJ, et al. The Richmond Agitation-Sedation Scale: validity and  
44  
45 702 reliability in adult intensive care unit patients. *Am J Respir Crit Care Med* 2002;166(10):1338-  
46  
47 703 44. doi: 10.1164/rccm.2107138 [doi];166/10/1338 [pii]  
48  
49 704 48. Tiegues Z, McGrath A, Hall RJ, et al. Abnormal level of arousal as a predictor of delirium and  
50  
51 705 inattention: an exploratory study. *The American journal of geriatric psychiatry : official*  
52  
53  
54  
55  
56  
57  
58  
59  
60

- 1  
2  
3 706 *journal of the American Association for Geriatric Psychiatry* 2013;21(12):1244-53. doi:  
4  
5 707 10.1016/j.jagp.2013.05.003  
6  
7 708 49. Hall RJ, Meagher DJ, Maclullich AM. Delirium detection and monitoring outside the ICU.  
8  
9 709 *BestPractResClinAnaesthesiol* 2012;26(3):367-83. doi: S1521-6896(12)00035-3  
10  
11 710 [pii];10.1016/j.bpa.2012.07.002 [doi]  
12  
13  
14 711 50. Ely EW, Inouye SK, Bernard GR, et al. Delirium in mechanically ventilated patients: validity and  
15  
16 712 reliability of the confusion assessment method for the intensive care unit (CAM-ICU). *JAMA*  
17  
18 713 2001;286(21):2703-10. doi: 10.1001/jama.286.21.2703 [published Online First: 2001/12/26]  
19  
20  
21 714 51. Khan BA, Perkins AJ, Gao S, et al. The Confusion Assessment Method for the ICU-7 Delirium  
22  
23 715 Severity Scale: A Novel Delirium Severity Instrument for Use in the ICU. *Crit Care Med*  
24  
25 716 2017;45(5):851-57. doi: 10.1097/CCM.0000000000002368  
26  
27  
28 717 52. Nasreddine ZS, Phillips NA, Bedirian V, et al. The Montreal Cognitive Assessment, MoCA: a brief  
29  
30 718 screening tool for mild cognitive impairment. *Journal of the American Geriatrics Society*  
31  
32 719 2005;53(4):695-9. doi: 10.1111/j.1532-5415.2005.53221.x [published Online First:  
33  
34 720 2005/04/09]  
35  
36  
37 721 53. Morris JC, Heyman A, Mohs RC, et al. The Consortium to Establish a Registry for Alzheimer's  
38  
39 722 Disease (CERAD). Part I. Clinical and neuropsychological assessment of Alzheimer's disease.  
40  
41 723 *Neurology* 1989;39(9):1159-65. [published Online First: 1989/09/01]  
42  
43  
44 724 54. Tombaugh TN. Trail Making Test A and B: normative data stratified by age and education.  
45  
46 725 *Archives of clinical neuropsychology : the official journal of the National Academy of*  
47  
48 726 *Neuropsychologists* 2004;19(2):203-14. doi: 10.1016/S0887-6177(03)00039-8 [published  
49  
50 727 Online First: 2004/03/11]  
51  
52  
53 728 55. Tombaugh TN, Kozak J, Rees L. Normative data stratified by age and education for two measures  
54  
55 729 of verbal fluency: FAS and animal naming. *Archives of clinical neuropsychology : the official*  
56  
57 730 *journal of the National Academy of Neuropsychologists* 1999;14(2):167-77. [published Online  
58  
59 731 First: 2003/11/01]  
60



- 1  
2  
3 732 56. Wechsler D NH, Nordvik H. Wais-III Wechsler Adult Intelligence Scale : manual. 3. Ed. Stockholm:  
4  
5 733 Psykologiförlaget 2003.  
6  
7 734 57. Searle SD, Mitnitski A, Gahbauer EA, et al. A standard procedure for creating a frailty index. *BMC*  
8  
9 735 *geriatrics* 2008;8:24. doi: 10.1186/1471-2318-8-24 [published Online First: 2008/10/02]  
10  
11 736 58. Kim DH, Afilalo J, Shi SM, et al. Evaluation of Changes in Functional Status in the Year After Aortic  
12  
13 737 Valve Replacement. *JAMA Intern Med* 2019;179(3):383-91. doi:  
14  
15 738 10.1001/jamainternmed.2018.6738 [published Online First: 2019/02/05]  
16  
17 739 59. Afilalo J, Lauck S, Kim DH, et al. Frailty in Older Adults Undergoing Aortic Valve Replacement: The  
18  
19 740 FRAILITY-AVR Study. *J Am Coll Cardiol* 2017;70(6):689-700. doi: 10.1016/j.jacc.2017.06.024  
20  
21 741 [published Online First: 2017/07/12]  
22  
23 742 60. Halaas NB, Blennow K, Idland AV, et al. Neurofilament Light in Serum and Cerebrospinal Fluid of  
24  
25 743 Hip Fracture Patients with Delirium. *Dementia and geriatric cognitive disorders* 2018;46(5-  
26  
27 744 6):346-57. doi: 10.1159/000494754 [published Online First: 2018/12/07]  
28  
29 745 61. Karikari TK, Pascoal TA, Ashton NJ, et al. Blood phosphorylated tau 181 as a biomarker for  
30  
31 746 Alzheimer's disease: a diagnostic performance and prediction modelling study using data  
32  
33 747 from four prospective cohorts. *The Lancet Neurology* 2020;19(5):422-33. doi: 10.1016/S1474-  
34  
35 748 4422(20)30071-5 [published Online First: 2020/04/26]  
36  
37 749 62. Ballweg T, White M, Parker M, et al. Association between plasma tau and postoperative delirium  
38  
39 750 incidence and severity: a prospective observational study. *British journal of anaesthesia*  
40  
41 751 2021;126(2):458-66. doi: 10.1016/j.bja.2020.08.061 [published Online First: 2020/11/25]  
42  
43 752 63. Yu L, Wen G, Zhu S, et al. Abnormal phosphorylation of tau protein and neuroinflammation  
44  
45 753 induced by laparotomy in an animal model of postoperative delirium. *Experimental brain*  
46  
47 754 *research* 2021 doi: 10.1007/s00221-020-06007-2 [published Online First: 2021/01/08]  
48  
49 755 64. Sajjad MU, Blennow K, Knapskog AB, et al. Cerebrospinal Fluid Levels of Interleukin-8 in Delirium,  
50  
51 756 Dementia, and Cognitively Healthy Patients. *Journal of Alzheimer's disease : JAD*  
52  
53 757 2020;73(4):1363-72. doi: 10.3233/JAD-190941 [published Online First: 2020/01/14]  
54  
55  
56  
57  
58  
59  
60



- 1  
2  
3 758 65. Hov KR, Bolstad N, Idland AV, et al. Cerebrospinal Fluid S100B and Alzheimer's Disease  
4  
5 759 Biomarkers in Hip Fracture Patients with Delirium. *Dementia and geriatric cognitive disorders*  
6  
7 760 *extra* 2017;7(3):374-85. doi: 10.1159/000481853 [published Online First: 2017/12/29]  
8  
9  
10 761 66. Neerland BE, Hall RJ, Seljeflot I, et al. Associations Between Delirium and Preoperative  
11  
12 762 Cerebrospinal Fluid C-Reactive Protein, Interleukin-6, and Interleukin-6 Receptor in  
13  
14 763 Individuals with Acute Hip Fracture. *Journal of the American Geriatrics Society*  
15  
16 764 2016;64(7):1456-63. doi: 10.1111/jgs.14238 [published Online First: 2016/06/25]  
17  
18  
19 765 67. Balaganapathy P, Baik SH, Mallilankaraman K, et al. Interplay between Notch and p53 promotes  
20  
21 766 neuronal cell death in ischemic stroke. *Journal of cerebral blood flow and metabolism :*  
22  
23 767 *official journal of the International Society of Cerebral Blood Flow and Metabolism*  
24  
25 768 2018;38(10):1781-95. doi: 10.1177/0271678X17715956  
26  
27  
28 769 68. Wedervang-Resell K, Ueland T, Aukrust P, et al. Reduced levels of circulating adhesion molecules  
29  
30 770 in adolescents with early-onset psychosis. *NPJ Schizophr* 2020;6(1):20. doi: 10.1038/s41537-  
31  
32 771 020-00112-5  
33  
34  
35 772 69. Fleming TR, DeMets DL, Roe MT, et al. Data monitoring committees: Promoting best practices to  
36  
37 773 address emerging challenges. *Clin Trials* 2017;14(2):115-23. doi: 10.1177/1740774516688915  
38  
39 774 70. Wang YY, Yue JR, Xie DM, et al. Effect of the Tailored, Family-Involved Hospital Elder Life Program  
40  
41 775 on Postoperative Delirium and Function in Older Adults A Randomized Clinical Trial. *Jama*  
42  
43 776 *Internal Medicine* 2020;180(1):17-25. doi: 10.1001/jamainternmed.2019.4446  
44  
45  
46 777 71. Su X, Meng ZT, Wu XH, et al. Dexmedetomidine for prevention of delirium in elderly patients after  
47  
48 778 non-cardiac surgery: a randomised, double-blind, placebo-controlled trial. *Lancet* 2016 doi:  
49  
50 779 10.1016/S0140-6736(16)30580-3  
51  
52  
53 780 72. Shehabi Y, Grant P, Wolfenden H, et al. Prevalence of delirium with dexmedetomidine compared  
54  
55 781 with morphine based therapy after cardiac surgery: a randomized controlled trial  
56  
57 782 (DEXmedetomidine COmpared to Morphine-DEXCOM Study). *Anesthesiology*  
58  
59 783 2009;111(5):1075-84. doi: 10.1097/ALN.0b013e3181b6a783 [doi]  
60

- 1  
2  
3 784 73. Jamadarkhana S, Gopal S. Clonidine in adults as a sedative agent in the intensive care unit.  
4  
5 785 *Journal of anaesthesiology, clinical pharmacology* 2010;26(4):439-45. [published Online First:  
6  
7 786 2011/05/07]  
8  
9  
10 787 74. Grest A, Kurmann J, Muller M, et al. Cardiovascular Safety of Clonidine and Dexmedetomidine in  
11  
12 788 Critically Ill Patients after Cardiac Surgery. *Crit Care Res Pract* 2020;2020:4750615. doi:  
13  
14 789 10.1155/2020/4750615 [published Online First: 2020/05/27]  
15  
16  
17 790 75. Wang N, Wang Z, Song X, et al. Intravenous dexmedetomidine versus intravenous clonidine for  
18  
19 791 post spinal anesthesia shivering: a meta-analysis of randomized controlled trials. *Scottish*  
20  
21 792 *medical journal* 2020;65(3):94-102. doi: 10.1177/0036933020936283 [published Online First:  
22  
23 793 2020/06/24]  
24  
25  
26  
27  
28  
29  
30  
31  
32  
33  
34  
35  
36  
37  
38  
39  
40  
41  
42  
43  
44  
45  
46  
47  
48  
49  
50  
51  
52  
53  
54  
55  
56  
57  
58  
59  
60

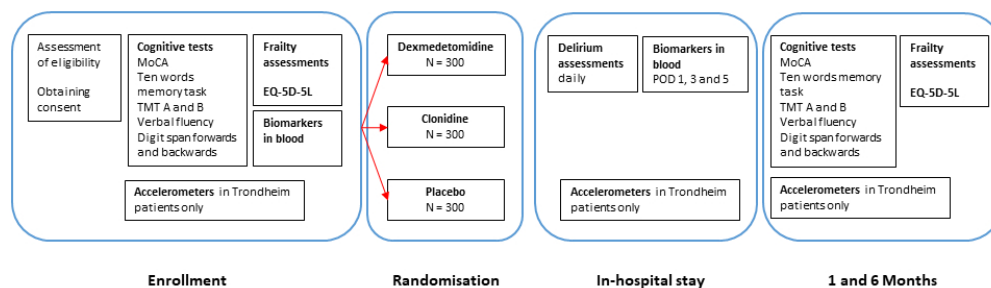

Figure 1:  
Study schema. MoCA, Montreal Cognitive Assessment; TMT, Trail Making Test; EQ-5D-5L, EuroQol 5 Dimension 5 Level; POD, Postoperative Day

254x190mm (96 x 96 DPI)

# Supplementary File 1

## Detailed explanation of sample size calculations

The following parameters were considered in the samples size calculation strategy and confirmations:

| Parameter                    | Explanation / justification     |                                                                                                                                                                                                                                                                                |
|------------------------------|---------------------------------|--------------------------------------------------------------------------------------------------------------------------------------------------------------------------------------------------------------------------------------------------------------------------------|
| <b>Proportions</b>           | <b>% delirium within 7 days</b> |                                                                                                                                                                                                                                                                                |
| Placebo                      | 30 %                            | Proportion of patients experiencing postoperative delirium after open heart surgery for all ages has been reported to be 24%, <sup>1</sup> and higher in the elderly. <sup>2</sup> With participants over 70 years in this trial, we expect the proportion to be at least 30%. |
| Dexmedetomidine (DEX)        | 15 %                            | Recent meta-analysis indicated dexmedetomidine approximately halves the risk of delirium <sup>3</sup>                                                                                                                                                                          |
| Clonidine                    | 20 %                            | Clonidine is anticipated to have similar effect to DEX, however 10 percentage point reduction would also be clinically significant                                                                                                                                             |
| <b>Power</b>                 | 80 %                            |                                                                                                                                                                                                                                                                                |
| <b>Significance level</b>    | 5 %                             |                                                                                                                                                                                                                                                                                |
| <b>Duration of follow-up</b> | 7-days                          |                                                                                                                                                                                                                                                                                |
| <b>Accrual period</b>        | 0-days*                         |                                                                                                                                                                                                                                                                                |

\*Observation period starts with operation for all participants

**Conservative sample size:** As described the initial, conservative samples size calculation based on comparison of two proportions indicated that a sample size of 290 in each group (870 altogether) will give a power of 80% with a significance level of 5% to detect such a difference between of 20 % delirium in the clonidine and 30 % in the placebo group in the proportion developing delirium within 7 days postoperatively. To account for dropouts, we aim at including 900 patients.

This sample size calculation approach was conservative considering the use of time-to-delirium analysis strategy, accommodating for a higher drop-out rate. Furthermore, the study will be more than adequately powered to find the greater expected reduction in delirium in the dexmedetomidine group.

Since we intend to use the logrank test to account for difference in the observation period, we confirmed that the calculated sample size was adequate using the more flexible calculation options in PASS Sample size software (version 20, NCCS, Kaysville, Utah, USA).

**Logrank test:** A two-sided logrank test with an overall sample size of 498 subjects (249 in the control group and 249 in the treatment group) achieves 80 % power at a 5 % significance level to a reduction in the proportion with delirium from 30 % in the control arm to 20 % in the clonidine arm (equivalent to a hazard ratio of 1.34). By including 300 participants in each group, we will still achieve 80 % power with up to 7 % drop-out rate over the first seven postoperative days. Drop out rates lower than 7 % will result in a higher power. Even with 10 % drop out rate, we will still achieve 80 % to detect a slightly larger difference between the groups (10.4 percentage point reduction, rather than 10 percentage points) (Figure S1).

**Multiplicity:** The planned comparisons for this trial are between dexmedetomidine versus placebo and clonidine versus placebo. Any comparison between dexmedetomidine and clonidine groups will be explorative and clearly stated as such. The extension of the CONSORT 2010 Statement for multi-arm parallel-group randomised trials recommend that adjustments for multiple comparisons are generally not necessary in trials comparing two or more independent treatments to placebo as we are here.<sup>4</sup> This has therefore not been factored into the sample size calculation. However, even with the very conservative Bonferroni adjustment for two comparisons a sample size of 300 participants per arm will be sufficient if there were no drop-outs and only minimally affect the difference in proportions which we can hope to identify with 80 % power if there is up to 10 % drop-out (Figure S1). For example, with 5 % dropout we can detect a 10.6 percentage point reduction in delirium cumulative incidence with 80 % and 2.5 % significance level (to account for multiplicity), or 11.3 percentage points if there was 10 % dropout (Figure S1).

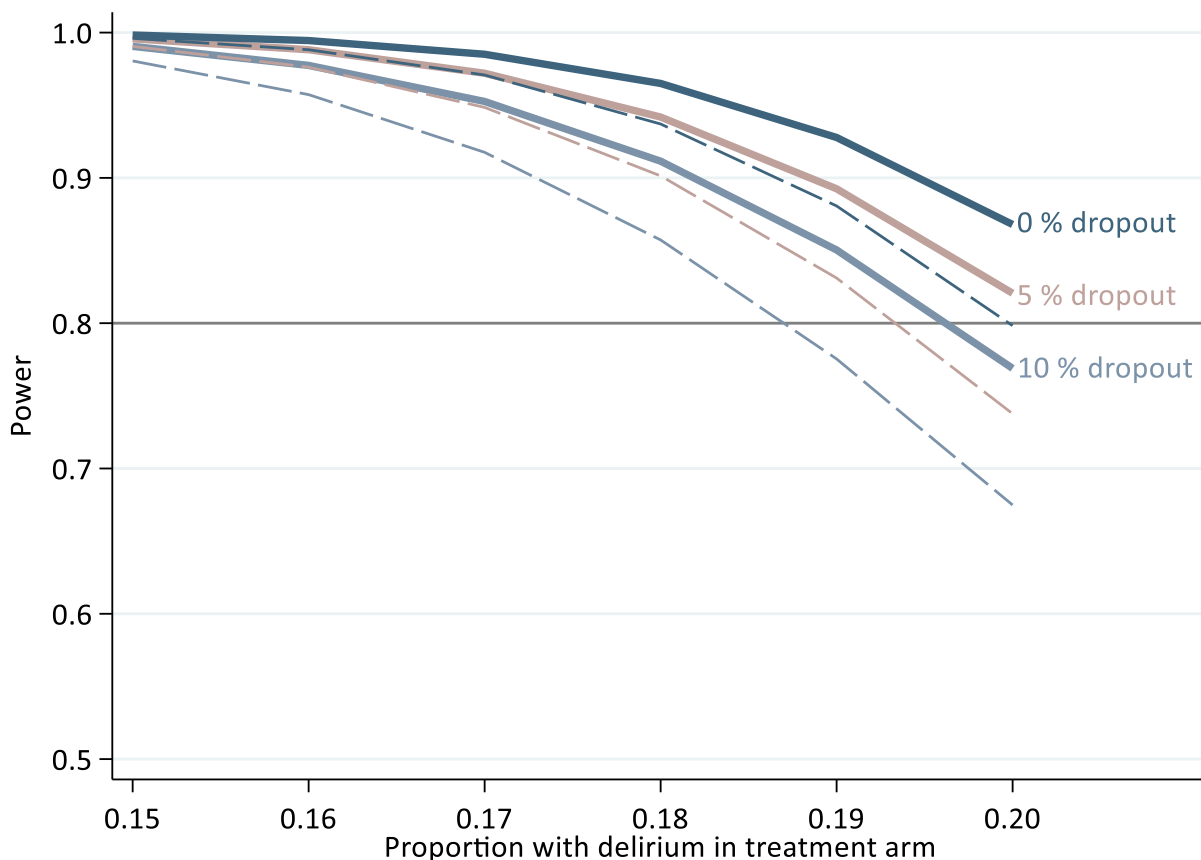

**Figure S1: Power depending differing drop-out rates** over the proportion with delirium in the treatment arm and where the proportion in the control arm is 30 %. The solid lines indicate the power with 5 % significance level for studies with no dropout (dark blue), 5 % dropout (pink) or 10 % dropout (medium blue). The corresponding broken lines indicate the power with 2.5 % significance level, a Bonferroni adjustment for the two planned comparisons.

- 1  
2  
3 1. Greaves D, Psaltis PJ, Ross TJ, et al. Cognitive outcomes following coronary artery bypass grafting:  
4 A systematic review and meta-analysis of 91,829 patients. *International journal of cardiology*  
5 2019;289:43-49. doi: 10.1016/j.ijcard.2019.04.065 [published Online First: 2019/05/13]  
6
- 7 2. Eide LS, Ranhoff AH, Fridlund B, et al. Comparison of frequency, risk factors, and time course of  
8 postoperative delirium in octogenarians after transcatheter aortic valve implantation versus  
9 surgical aortic valve replacement. *The American journal of cardiology* 2015;115(6):802-9. doi:  
10 10.1016/j.amjcard.2014.12.043 [published Online First: 2015/02/04]
- 11 3. Flukiger J, Hollinger A, Speich B, et al. Dexmedetomidine in prevention and treatment of  
12 postoperative and intensive care unit delirium: a systematic review and meta-analysis.  
13 *Annals of intensive care* 2018;8(1):92. doi: 10.1186/s13613-018-0437-z [published Online  
14 First: 2018/09/22]
- 15 4. Juszczak E, Altman DG, Hopewell S, et al. Reporting of Multi-Arm Parallel-Group Randomized Trials:  
16 Extension of the CONSORT 2010 Statement. *JAMA* 2019;321(16):1610-20. doi:  
17 10.1001/jama.2019.3087  
18  
19  
20  
21  
22  
23  
24  
25  
26  
27  
28  
29  
30  
31  
32  
33  
34  
35  
36  
37  
38  
39  
40  
41  
42  
43  
44  
45  
46  
47  
48  
49  
50  
51  
52  
53  
54  
55  
56  
57  
58  
59  
60

# Reporting checklist for protocol of a clinical trial.

Based on the SPIRIT guidelines.

## Instructions to authors

Complete this checklist by entering the page numbers from your manuscript where readers will find each of the items listed below.

Your article may not currently address all the items on the checklist. Please modify your text to include the missing information. If you are certain that an item does not apply, please write "n/a" and provide a short explanation.

Upload your completed checklist as an extra file when you submit to a journal.

In your methods section, say that you used the SPIRIT reporting guidelines, and cite them as:

Chan A-W, Tetzlaff JM, Gøtzsche PC, Altman DG, Mann H, Berlin J, Dickersin K, Hróbjartsson A, Schulz KF, Parulekar WR, Krleža-Jerić K, Laupacis A, Moher D. SPIRIT 2013 Explanation and Elaboration: Guidance for protocols of clinical trials. *BMJ*. 2013;346:e7586

|                                   |                     |                                                                                                              | Page<br>Number |
|-----------------------------------|---------------------|--------------------------------------------------------------------------------------------------------------|----------------|
| <b>Administrative information</b> |                     |                                                                                                              |                |
| Title                             | <a href="#">#1</a>  | Descriptive title identifying the study design, population, interventions, and, if applicable, trial acronym | 1              |
| Trial registration                | <a href="#">#2a</a> | Trial identifier and registry name. If not yet registered, name of intended registry                         | 6              |
| Trial registration: data set      | <a href="#">#2b</a> | All items from the World Health Organization Trial Registration Data Set                                     | 11             |
| Protocol version                  | <a href="#">#3</a>  | Date and version identifier                                                                                  | NA             |

|    |                      |                     |                                                                               |            |
|----|----------------------|---------------------|-------------------------------------------------------------------------------|------------|
| 1  | Funding              | <a href="#">#4</a>  | Sources and types of financial, material, and other support                   | 26         |
| 2  |                      |                     |                                                                               |            |
| 3  |                      |                     |                                                                               |            |
| 4  | Roles and            | <a href="#">#5a</a> | Names, affiliations, and roles of protocol contributors                       | 1-3,26     |
| 5  | responsibilities:    |                     |                                                                               |            |
| 6  | contributorship      |                     |                                                                               |            |
| 7  |                      |                     |                                                                               |            |
| 8  |                      |                     |                                                                               |            |
| 9  |                      |                     |                                                                               |            |
| 10 | Roles and            | <a href="#">#5b</a> | Name and contact information for the trial sponsor                            | 25-26      |
| 11 | responsibilities:    |                     |                                                                               |            |
| 12 | sponsor contact      |                     |                                                                               |            |
| 13 | information          |                     |                                                                               |            |
| 14 |                      |                     |                                                                               |            |
| 15 |                      |                     |                                                                               |            |
| 16 |                      |                     |                                                                               |            |
| 17 |                      |                     |                                                                               |            |
| 18 | Roles and            | <a href="#">#5c</a> | Role of study sponsor and funders, if any, in study design; collection,       | 26         |
| 19 | responsibilities:    |                     | management, analysis, and interpretation of data; writing of the report;      |            |
| 20 | sponsor and funder   |                     | and the decision to submit the report for publication, including whether      |            |
| 21 |                      |                     | they will have ultimate authority over any of these activities                |            |
| 22 |                      |                     |                                                                               |            |
| 23 |                      |                     |                                                                               |            |
| 24 |                      |                     |                                                                               |            |
| 25 |                      |                     |                                                                               |            |
| 26 |                      |                     |                                                                               |            |
| 27 | Roles and            | <a href="#">#5d</a> | Composition, roles, and responsibilities of the coordinating centre,          | 19-21      |
| 28 | responsibilities:    |                     | steering committee, endpoint adjudication committee, data management          |            |
| 29 | committees           |                     | team, and other individuals or groups overseeing the trial, if applicable     |            |
| 30 |                      |                     | (see Item 21a for data monitoring committee)                                  |            |
| 31 |                      |                     |                                                                               |            |
| 32 |                      |                     |                                                                               |            |
| 33 |                      |                     |                                                                               |            |
| 34 |                      |                     |                                                                               |            |
| 35 | <b>Introduction</b>  |                     |                                                                               |            |
| 36 |                      |                     |                                                                               |            |
| 37 |                      |                     |                                                                               |            |
| 38 | Background and       | <a href="#">#6a</a> | Description of research question and justification for undertaking the trial, | 8-10,16,23 |
| 39 | rationale            |                     | including summary of relevant studies (published and unpublished)             |            |
| 40 |                      |                     | examining benefits and harms for each intervention                            |            |
| 41 |                      |                     |                                                                               |            |
| 42 |                      |                     |                                                                               |            |
| 43 |                      |                     |                                                                               |            |
| 44 |                      |                     |                                                                               |            |
| 45 | Background and       | <a href="#">#6b</a> | Explanation for choice of comparators                                         | 11         |
| 46 | rationale: choice of |                     |                                                                               |            |
| 47 | comparators          |                     |                                                                               |            |
| 48 |                      |                     |                                                                               |            |
| 49 |                      |                     |                                                                               |            |
| 50 |                      |                     |                                                                               |            |
| 51 | Objectives           | <a href="#">#7</a>  | Specific objectives or hypotheses                                             | 10         |
| 52 |                      |                     |                                                                               |            |
| 53 |                      |                     |                                                                               |            |
| 54 | Trial design         | <a href="#">#8</a>  | Description of trial design including type of trial (eg, parallel group,      | 11         |
| 55 |                      |                     | crossover, factorial, single group), allocation ratio, and framework (eg,     |            |
| 56 |                      |                     | superiority, equivalence, non-inferiority, exploratory)                       |            |
| 57 |                      |                     |                                                                               |            |
| 58 |                      |                     |                                                                               |            |
| 59 |                      |                     |                                                                               |            |
| 60 |                      |                     |                                                                               |            |



1 **Methods: Participants,**  
 2  
 3 **interventions, and**  
 4  
 5 **outcomes**  
 6

|    |                      |                      |                                                                                                                                                                                                                                                                                                                                                                                |           |
|----|----------------------|----------------------|--------------------------------------------------------------------------------------------------------------------------------------------------------------------------------------------------------------------------------------------------------------------------------------------------------------------------------------------------------------------------------|-----------|
| 7  | Study setting        | <a href="#">#9</a>   | Description of study settings (eg, community clinic, academic hospital) and list of countries where data will be collected. Reference to where list of study sites can be obtained                                                                                                                                                                                             | 11        |
| 8  |                      |                      |                                                                                                                                                                                                                                                                                                                                                                                |           |
| 9  |                      |                      |                                                                                                                                                                                                                                                                                                                                                                                |           |
| 10 |                      |                      |                                                                                                                                                                                                                                                                                                                                                                                |           |
| 11 |                      |                      |                                                                                                                                                                                                                                                                                                                                                                                |           |
| 12 |                      |                      |                                                                                                                                                                                                                                                                                                                                                                                |           |
| 13 |                      |                      |                                                                                                                                                                                                                                                                                                                                                                                |           |
| 14 | Eligibility criteria | <a href="#">#10</a>  | Inclusion and exclusion criteria for participants. If applicable, eligibility criteria for study centres and individuals who will perform the interventions (eg, surgeons, psychotherapists)                                                                                                                                                                                   | 11-13     |
| 15 |                      |                      |                                                                                                                                                                                                                                                                                                                                                                                |           |
| 16 |                      |                      |                                                                                                                                                                                                                                                                                                                                                                                |           |
| 17 |                      |                      |                                                                                                                                                                                                                                                                                                                                                                                |           |
| 18 |                      |                      |                                                                                                                                                                                                                                                                                                                                                                                |           |
| 19 |                      |                      |                                                                                                                                                                                                                                                                                                                                                                                |           |
| 20 | Interventions:       | <a href="#">#11a</a> | Interventions for each group with sufficient detail to allow replication, including how and when they will be administered                                                                                                                                                                                                                                                     | 16        |
| 21 | description          |                      |                                                                                                                                                                                                                                                                                                                                                                                |           |
| 22 |                      |                      |                                                                                                                                                                                                                                                                                                                                                                                |           |
| 23 |                      |                      |                                                                                                                                                                                                                                                                                                                                                                                |           |
| 24 |                      |                      |                                                                                                                                                                                                                                                                                                                                                                                |           |
| 25 | Interventions:       | <a href="#">#11b</a> | Criteria for discontinuing or modifying allocated interventions for a given trial participant (eg, drug dose change in response to harms, participant request, or improving / worsening disease)                                                                                                                                                                               | 16, 20-21 |
| 26 | modifications        |                      |                                                                                                                                                                                                                                                                                                                                                                                |           |
| 27 |                      |                      |                                                                                                                                                                                                                                                                                                                                                                                |           |
| 28 |                      |                      |                                                                                                                                                                                                                                                                                                                                                                                |           |
| 29 |                      |                      |                                                                                                                                                                                                                                                                                                                                                                                |           |
| 30 |                      |                      |                                                                                                                                                                                                                                                                                                                                                                                |           |
| 31 | Interventions:       | <a href="#">#11c</a> | Strategies to improve adherence to intervention protocols, and any procedures for monitoring adherence (eg, drug tablet return; laboratory tests)                                                                                                                                                                                                                              | 21        |
| 32 | adherence            |                      |                                                                                                                                                                                                                                                                                                                                                                                |           |
| 33 |                      |                      |                                                                                                                                                                                                                                                                                                                                                                                |           |
| 34 |                      |                      |                                                                                                                                                                                                                                                                                                                                                                                |           |
| 35 |                      |                      |                                                                                                                                                                                                                                                                                                                                                                                |           |
| 36 |                      |                      |                                                                                                                                                                                                                                                                                                                                                                                |           |
| 37 |                      |                      |                                                                                                                                                                                                                                                                                                                                                                                |           |
| 38 | Interventions:       | <a href="#">#11d</a> | Relevant concomitant care and interventions that are permitted or prohibited during the trial                                                                                                                                                                                                                                                                                  | 16        |
| 39 | concomitant care     |                      |                                                                                                                                                                                                                                                                                                                                                                                |           |
| 40 |                      |                      |                                                                                                                                                                                                                                                                                                                                                                                |           |
| 41 |                      |                      |                                                                                                                                                                                                                                                                                                                                                                                |           |
| 42 |                      |                      |                                                                                                                                                                                                                                                                                                                                                                                |           |
| 43 | Outcomes             | <a href="#">#12</a>  | Primary, secondary, and other outcomes, including the specific measurement variable (eg, systolic blood pressure), analysis metric (eg, change from baseline, final value, time to event), method of aggregation (eg, median, proportion), and time point for each outcome. Explanation of the clinical relevance of chosen efficacy and harm outcomes is strongly recommended | 16-19     |
| 44 |                      |                      |                                                                                                                                                                                                                                                                                                                                                                                |           |
| 45 |                      |                      |                                                                                                                                                                                                                                                                                                                                                                                |           |
| 46 |                      |                      |                                                                                                                                                                                                                                                                                                                                                                                |           |
| 47 |                      |                      |                                                                                                                                                                                                                                                                                                                                                                                |           |
| 48 |                      |                      |                                                                                                                                                                                                                                                                                                                                                                                |           |
| 49 |                      |                      |                                                                                                                                                                                                                                                                                                                                                                                |           |
| 50 |                      |                      |                                                                                                                                                                                                                                                                                                                                                                                |           |
| 51 |                      |                      |                                                                                                                                                                                                                                                                                                                                                                                |           |
| 52 |                      |                      |                                                                                                                                                                                                                                                                                                                                                                                |           |
| 53 |                      |                      |                                                                                                                                                                                                                                                                                                                                                                                |           |
| 54 |                      |                      |                                                                                                                                                                                                                                                                                                                                                                                |           |
| 55 |                      |                      |                                                                                                                                                                                                                                                                                                                                                                                |           |
| 56 |                      |                      |                                                                                                                                                                                                                                                                                                                                                                                |           |
| 57 |                      |                      |                                                                                                                                                                                                                                                                                                                                                                                |           |
| 58 |                      |                      |                                                                                                                                                                                                                                                                                                                                                                                |           |
| 59 |                      |                      |                                                                                                                                                                                                                                                                                                                                                                                |           |
| 60 |                      |                      |                                                                                                                                                                                                                                                                                                                                                                                |           |

|    |                                  |                      |                                                                                                                                                                                                                                                                                                                                                          |                                |
|----|----------------------------------|----------------------|----------------------------------------------------------------------------------------------------------------------------------------------------------------------------------------------------------------------------------------------------------------------------------------------------------------------------------------------------------|--------------------------------|
| 1  | Participant timeline             | <a href="#">#13</a>  | Time schedule of enrolment, interventions (including any run-ins and washouts), assessments, and visits for participants. A schematic diagram is highly recommended (see Figure)                                                                                                                                                                         | 11-16,<br>Table 2,<br>Figure 1 |
| 2  |                                  |                      |                                                                                                                                                                                                                                                                                                                                                          |                                |
| 3  |                                  |                      |                                                                                                                                                                                                                                                                                                                                                          |                                |
| 4  |                                  |                      |                                                                                                                                                                                                                                                                                                                                                          |                                |
| 5  |                                  |                      |                                                                                                                                                                                                                                                                                                                                                          |                                |
| 6  |                                  |                      |                                                                                                                                                                                                                                                                                                                                                          |                                |
| 7  |                                  |                      |                                                                                                                                                                                                                                                                                                                                                          |                                |
| 8  |                                  |                      |                                                                                                                                                                                                                                                                                                                                                          |                                |
| 9  |                                  |                      |                                                                                                                                                                                                                                                                                                                                                          |                                |
| 10 | Sample size                      | <a href="#">#14</a>  | Estimated number of participants needed to achieve study objectives and how it was determined, including clinical and statistical assumptions supporting any sample size calculations                                                                                                                                                                    | 21                             |
| 11 |                                  |                      |                                                                                                                                                                                                                                                                                                                                                          |                                |
| 12 |                                  |                      |                                                                                                                                                                                                                                                                                                                                                          |                                |
| 13 |                                  |                      |                                                                                                                                                                                                                                                                                                                                                          |                                |
| 14 |                                  |                      |                                                                                                                                                                                                                                                                                                                                                          |                                |
| 15 |                                  |                      |                                                                                                                                                                                                                                                                                                                                                          |                                |
| 16 |                                  |                      |                                                                                                                                                                                                                                                                                                                                                          |                                |
| 17 | Recruitment                      | <a href="#">#15</a>  | Strategies for achieving adequate participant enrolment to reach target sample size                                                                                                                                                                                                                                                                      | 11                             |
| 18 |                                  |                      |                                                                                                                                                                                                                                                                                                                                                          |                                |
| 19 |                                  |                      |                                                                                                                                                                                                                                                                                                                                                          |                                |
| 20 |                                  |                      |                                                                                                                                                                                                                                                                                                                                                          |                                |
| 21 | <b>Methods: Assignment</b>       |                      |                                                                                                                                                                                                                                                                                                                                                          |                                |
| 22 | <b>of interventions (for</b>     |                      |                                                                                                                                                                                                                                                                                                                                                          |                                |
| 23 | <b>controlled trials)</b>        |                      |                                                                                                                                                                                                                                                                                                                                                          |                                |
| 24 |                                  |                      |                                                                                                                                                                                                                                                                                                                                                          |                                |
| 25 |                                  |                      |                                                                                                                                                                                                                                                                                                                                                          |                                |
| 26 |                                  |                      |                                                                                                                                                                                                                                                                                                                                                          |                                |
| 27 |                                  |                      |                                                                                                                                                                                                                                                                                                                                                          |                                |
| 28 | Allocation: sequence generation  | <a href="#">#16a</a> | Method of generating the allocation sequence (eg, computer-generated random numbers), and list of any factors for stratification. To reduce predictability of a random sequence, details of any planned restriction (eg, blocking) should be provided in a separate document that is unavailable to those who enrol participants or assign interventions | 13                             |
| 29 |                                  |                      |                                                                                                                                                                                                                                                                                                                                                          |                                |
| 30 |                                  |                      |                                                                                                                                                                                                                                                                                                                                                          |                                |
| 31 |                                  |                      |                                                                                                                                                                                                                                                                                                                                                          |                                |
| 32 |                                  |                      |                                                                                                                                                                                                                                                                                                                                                          |                                |
| 33 |                                  |                      |                                                                                                                                                                                                                                                                                                                                                          |                                |
| 34 |                                  |                      |                                                                                                                                                                                                                                                                                                                                                          |                                |
| 35 |                                  |                      |                                                                                                                                                                                                                                                                                                                                                          |                                |
| 36 |                                  |                      |                                                                                                                                                                                                                                                                                                                                                          |                                |
| 37 |                                  |                      |                                                                                                                                                                                                                                                                                                                                                          |                                |
| 38 | Allocation concealment mechanism | <a href="#">#16b</a> | Mechanism of implementing the allocation sequence (eg, central telephone; sequentially numbered, opaque, sealed envelopes), describing any steps to conceal the sequence until interventions are assigned                                                                                                                                                | 13                             |
| 39 |                                  |                      |                                                                                                                                                                                                                                                                                                                                                          |                                |
| 40 |                                  |                      |                                                                                                                                                                                                                                                                                                                                                          |                                |
| 41 |                                  |                      |                                                                                                                                                                                                                                                                                                                                                          |                                |
| 42 |                                  |                      |                                                                                                                                                                                                                                                                                                                                                          |                                |
| 43 |                                  |                      |                                                                                                                                                                                                                                                                                                                                                          |                                |
| 44 |                                  |                      |                                                                                                                                                                                                                                                                                                                                                          |                                |
| 45 |                                  |                      |                                                                                                                                                                                                                                                                                                                                                          |                                |
| 46 | Allocation: implementation       | <a href="#">#16c</a> | Who will generate the allocation sequence, who will enrol participants, and who will assign participants to interventions                                                                                                                                                                                                                                | 11-13                          |
| 47 |                                  |                      |                                                                                                                                                                                                                                                                                                                                                          |                                |
| 48 |                                  |                      |                                                                                                                                                                                                                                                                                                                                                          |                                |
| 49 |                                  |                      |                                                                                                                                                                                                                                                                                                                                                          |                                |
| 50 |                                  |                      |                                                                                                                                                                                                                                                                                                                                                          |                                |
| 51 | Blinding (masking)               | <a href="#">#17a</a> | Who will be blinded after assignment to interventions (eg, trial participants, care providers, outcome assessors, data analysts), and how                                                                                                                                                                                                                | 13                             |
| 52 |                                  |                      |                                                                                                                                                                                                                                                                                                                                                          |                                |
| 53 |                                  |                      |                                                                                                                                                                                                                                                                                                                                                          |                                |
| 54 |                                  |                      |                                                                                                                                                                                                                                                                                                                                                          |                                |
| 55 |                                  |                      |                                                                                                                                                                                                                                                                                                                                                          |                                |
| 56 |                                  |                      |                                                                                                                                                                                                                                                                                                                                                          |                                |
| 57 |                                  |                      |                                                                                                                                                                                                                                                                                                                                                          |                                |
| 58 |                                  |                      |                                                                                                                                                                                                                                                                                                                                                          |                                |
| 59 |                                  |                      |                                                                                                                                                                                                                                                                                                                                                          |                                |
| 60 |                                  |                      |                                                                                                                                                                                                                                                                                                                                                          |                                |

|    |                        |                      |                                                                              |           |
|----|------------------------|----------------------|------------------------------------------------------------------------------|-----------|
| 1  | Blinding (masking):    | <a href="#">#17b</a> | If blinded, circumstances under which unblinding is permissible, and         | 20-21     |
| 2  |                        |                      |                                                                              |           |
| 3  | emergency unblinding   |                      | procedure for revealing a participant's allocated intervention during the    |           |
| 4  |                        |                      |                                                                              |           |
| 5  |                        |                      | trial                                                                        |           |
| 6  |                        |                      |                                                                              |           |
| 7  |                        |                      |                                                                              |           |
| 8  | <b>Methods: Data</b>   |                      |                                                                              |           |
| 9  | <b>collection,</b>     |                      |                                                                              |           |
| 10 | <b>management, and</b> |                      |                                                                              |           |
| 11 | <b>analysis</b>        |                      |                                                                              |           |
| 12 |                        |                      |                                                                              |           |
| 13 |                        |                      |                                                                              |           |
| 14 |                        |                      |                                                                              |           |
| 15 |                        |                      |                                                                              |           |
| 16 | Data collection plan   | <a href="#">#18a</a> | Plans for assessment and collection of outcome, baseline, and other trial    | 13,16-19, |
| 17 |                        |                      | data, including any related processes to promote data quality (eg,           | Table 2   |
| 18 |                        |                      | duplicate measurements, training of assessors) and a description of          |           |
| 19 |                        |                      | study instruments (eg, questionnaires, laboratory tests) along with their    |           |
| 20 |                        |                      | reliability and validity, if known. Reference to where data collection forms |           |
| 21 |                        |                      | can be found, if not in the protocol                                         |           |
| 22 |                        |                      |                                                                              |           |
| 23 |                        |                      |                                                                              |           |
| 24 |                        |                      |                                                                              |           |
| 25 |                        |                      |                                                                              |           |
| 26 |                        |                      |                                                                              |           |
| 27 |                        |                      |                                                                              |           |
| 28 | Data collection plan:  | <a href="#">#18b</a> | Plans to promote participant retention and complete follow-up, including     | 21-22     |
| 29 | retention              |                      | list of any outcome data to be collected for participants who discontinue    |           |
| 30 |                        |                      | or deviate from intervention protocols                                       |           |
| 31 |                        |                      |                                                                              |           |
| 32 |                        |                      |                                                                              |           |
| 33 |                        |                      |                                                                              |           |
| 34 |                        |                      |                                                                              |           |
| 35 | Data management        | <a href="#">#19</a>  | Plans for data entry, coding, security, and storage, including any related   | 19-20     |
| 36 |                        |                      | processes to promote data quality (eg, double data entry; range checks       |           |
| 37 |                        |                      | for data values). Reference to where details of data management              |           |
| 38 |                        |                      | procedures can be found, if not in the protocol                              |           |
| 39 |                        |                      |                                                                              |           |
| 40 |                        |                      |                                                                              |           |
| 41 |                        |                      |                                                                              |           |
| 42 |                        |                      |                                                                              |           |
| 43 | Statistics: outcomes   | <a href="#">#20a</a> | Statistical methods for analysing primary and secondary outcomes.            | 21-23     |
| 44 |                        |                      | Reference to where other details of the statistical analysis plan can be     |           |
| 45 |                        |                      | found, if not in the protocol                                                |           |
| 46 |                        |                      |                                                                              |           |
| 47 |                        |                      |                                                                              |           |
| 48 |                        |                      |                                                                              |           |
| 49 | Statistics: additional | <a href="#">#20b</a> | Methods for any additional analyses (eg, subgroup and adjusted               | 21-23     |
| 50 | analyses               |                      | analyses)                                                                    |           |
| 51 |                        |                      |                                                                              |           |
| 52 |                        |                      |                                                                              |           |
| 53 |                        |                      |                                                                              |           |
| 54 | Statistics: analysis   | <a href="#">#20c</a> | Definition of analysis population relating to protocol non-adherence (eg,    | 21-23     |
| 55 | population and         |                      | as randomised analysis), and any statistical methods to handle missing       |           |
| 56 | missing data           |                      | data (eg, multiple imputation)                                               |           |
| 57 |                        |                      |                                                                              |           |
| 58 |                        |                      |                                                                              |           |
| 59 |                        |                      |                                                                              |           |
| 60 |                        |                      |                                                                              |           |

|    |                            |                      |                                                                                  |
|----|----------------------------|----------------------|----------------------------------------------------------------------------------|
| 1  | <b>Methods: Monitoring</b> |                      |                                                                                  |
| 2  |                            |                      |                                                                                  |
| 3  |                            |                      |                                                                                  |
| 4  | Data monitoring:           | <a href="#">#21a</a> | Composition of data monitoring committee (DMC); summary of its role 21           |
| 5  |                            |                      |                                                                                  |
| 6  | formal committee           |                      | and reporting structure; statement of whether it is independent from the         |
| 7  |                            |                      | sponsor and competing interests; and reference to where further details          |
| 8  |                            |                      | about its charter can be found, if not in the protocol. Alternatively, an        |
| 9  |                            |                      | explanation of why a DMC is not needed                                           |
| 10 |                            |                      |                                                                                  |
| 11 |                            |                      |                                                                                  |
| 12 |                            |                      |                                                                                  |
| 13 |                            |                      |                                                                                  |
| 14 | Data monitoring:           | <a href="#">#21b</a> | Description of any interim analyses and stopping guidelines, including 21        |
| 15 |                            |                      |                                                                                  |
| 16 | interim analysis           |                      | who will have access to these interim results and make the final decision        |
| 17 |                            |                      | to terminate the trial                                                           |
| 18 |                            |                      |                                                                                  |
| 19 |                            |                      |                                                                                  |
| 20 |                            |                      |                                                                                  |
| 21 | Harms                      | <a href="#">#22</a>  | Plans for collecting, assessing, reporting, and managing solicited and 20-21     |
| 22 |                            |                      | spontaneously reported adverse events and other unintended effects of            |
| 23 |                            |                      | trial interventions or trial conduct                                             |
| 24 |                            |                      |                                                                                  |
| 25 |                            |                      |                                                                                  |
| 26 |                            |                      |                                                                                  |
| 27 | Auditing                   | <a href="#">#23</a>  | Frequency and procedures for auditing trial conduct, if any, and whether 21      |
| 28 |                            |                      | the process will be independent from investigators and the sponsor               |
| 29 |                            |                      |                                                                                  |
| 30 |                            |                      |                                                                                  |
| 31 |                            |                      |                                                                                  |
| 32 | <b>Ethics and</b>          |                      |                                                                                  |
| 33 | <b>dissemination</b>       |                      |                                                                                  |
| 34 |                            |                      |                                                                                  |
| 35 |                            |                      |                                                                                  |
| 36 | Research ethics            | <a href="#">#24</a>  | Plans for seeking research ethics committee / institutional review board 6,23,25 |
| 37 |                            |                      |                                                                                  |
| 38 | approval                   |                      | (REC / IRB) approval                                                             |
| 39 |                            |                      |                                                                                  |
| 40 |                            |                      |                                                                                  |
| 41 | Protocol amendments        | <a href="#">#25</a>  | Plans for communicating important protocol modifications (eg, changes 23         |
| 42 |                            |                      | to eligibility criteria, outcomes, analyses) to relevant parties (eg,            |
| 43 |                            |                      | investigators, REC / IRBs, trial participants, trial registries, journals,       |
| 44 |                            |                      | regulators)                                                                      |
| 45 |                            |                      |                                                                                  |
| 46 |                            |                      |                                                                                  |
| 47 |                            |                      |                                                                                  |
| 48 |                            |                      |                                                                                  |
| 49 | Consent or assent          | <a href="#">#26a</a> | Who will obtain informed consent or assent from potential trial 11               |
| 50 |                            |                      | participants or authorised surrogates, and how (see Item 32)                     |
| 51 |                            |                      |                                                                                  |
| 52 |                            |                      |                                                                                  |
| 53 |                            |                      |                                                                                  |
| 54 | Consent or assent:         | <a href="#">#26b</a> | Additional consent provisions for collection and use of participant data 11      |
| 55 |                            |                      |                                                                                  |
| 56 | ancillary studies          |                      | and biological specimens in ancillary studies, if applicable                     |
| 57 |                            |                      |                                                                                  |
| 58 |                            |                      |                                                                                  |
| 59 |                            |                      |                                                                                  |
| 60 |                            |                      |                                                                                  |

|    |                          |                      |                                                                              |       |
|----|--------------------------|----------------------|------------------------------------------------------------------------------|-------|
| 1  | Confidentiality          | <a href="#">#27</a>  | How personal information about potential and enrolled participants will be   | 19,20 |
| 2  |                          |                      | collected, shared, and maintained in order to protect confidentiality        |       |
| 3  |                          |                      | before, during, and after the trial                                          |       |
| 4  |                          |                      |                                                                              |       |
| 5  |                          |                      |                                                                              |       |
| 6  |                          |                      |                                                                              |       |
| 7  | Declaration of           | <a href="#">#28</a>  | Financial and other competing interests for principal investigators for the  | 25-26 |
| 8  | interests                |                      | overall trial and each study site                                            |       |
| 9  |                          |                      |                                                                              |       |
| 10 |                          |                      |                                                                              |       |
| 11 |                          |                      |                                                                              |       |
| 12 | Data access              | <a href="#">#29</a>  | Statement of who will have access to the final trial dataset, and            | 20,25 |
| 13 |                          |                      | disclosure of contractual agreements that limit such access for              |       |
| 14 |                          |                      | investigators                                                                |       |
| 15 |                          |                      |                                                                              |       |
| 16 |                          |                      |                                                                              |       |
| 17 |                          |                      |                                                                              |       |
| 18 | Ancillary and post trial | <a href="#">#30</a>  | Provisions, if any, for ancillary and post-trial care, and for compensation  | 20-21 |
| 19 | care                     |                      | to those who suffer harm from trial participation                            |       |
| 20 |                          |                      |                                                                              |       |
| 21 |                          |                      |                                                                              |       |
| 22 |                          |                      |                                                                              |       |
| 23 | Dissemination policy:    | <a href="#">#31a</a> | Plans for investigators and sponsor to communicate trial results to          | 6,23  |
| 24 | trial results            |                      | participants, healthcare professionals, the public, and other relevant       |       |
| 25 |                          |                      | groups (eg, via publication, reporting in results databases, or other data   |       |
| 26 |                          |                      | sharing arrangements), including any publication restrictions                |       |
| 27 |                          |                      |                                                                              |       |
| 28 |                          |                      |                                                                              |       |
| 29 |                          |                      |                                                                              |       |
| 30 |                          |                      |                                                                              |       |
| 31 | Dissemination policy:    | <a href="#">#31b</a> | Authorship eligibility guidelines and any intended use of professional       | 23    |
| 32 | authorship               |                      | writers                                                                      |       |
| 33 |                          |                      |                                                                              |       |
| 34 |                          |                      |                                                                              |       |
| 35 |                          |                      |                                                                              |       |
| 36 | Dissemination policy:    | <a href="#">#31c</a> | Plans, if any, for granting public access to the full protocol, participant- | 25    |
| 37 | reproducible research    |                      | level dataset, and statistical code                                          |       |
| 38 |                          |                      |                                                                              |       |
| 39 |                          |                      |                                                                              |       |
| 40 |                          |                      |                                                                              |       |
| 41 | <b>Appendices</b>        |                      |                                                                              |       |
| 42 |                          |                      |                                                                              |       |
| 43 |                          |                      |                                                                              |       |
| 44 | Informed consent         | <a href="#">#32</a>  | Model consent form and other related documentation given to                  | 11    |
| 45 | materials                |                      | participants and authorised surrogates                                       |       |
| 46 |                          |                      |                                                                              |       |
| 47 |                          |                      |                                                                              |       |
| 48 | Biological specimens     | <a href="#">#33</a>  | Plans for collection, laboratory evaluation, and storage of biological       | 14,19 |
| 49 |                          |                      | specimens for genetic or molecular analysis in the current trial and for     |       |
| 50 |                          |                      | future use in ancillary studies, if applicable                               |       |
| 51 |                          |                      |                                                                              |       |
| 52 |                          |                      |                                                                              |       |
| 53 |                          |                      |                                                                              |       |
| 54 |                          |                      |                                                                              |       |

None The SPIRIT Explanation and Elaboration paper is distributed under the terms of the Creative Commons Attribution License CC-BY-NC. This checklist can be completed online using <https://www.goodreports.org/>, a tool made by the EQUATOR Network in collaboration with [Penelope.ai](#)
